# Supplementary material for: Isolation of Scalarane-Type Sesterterpenoids from the Marine Sponge Dysidea sp. and Stereochemical Reassignment of 12-epi-Phyllactone D/E
Source: MDPI journal article supplement (doi:10.3390/md19110627), 2021-11-09
Supplement: s1 [file s1]

Supporting Information

*NMR Spectra*

Isolation of Scalarane-type Sesterterpenoids from the  
Marine Sponge *Dysidea* sp. and Stereochemical  
Reassignment of 12-*epi*-phyllactone D/E

*A-Young Shin,<sup>1,2</sup> Arang Son,<sup>3</sup> Changhoon Choi,<sup>3</sup>*

*and Jihoon Lee<sup>\*1,2</sup>*

<sup>1</sup>Korea Institute of Ocean Science and Technology (KIOST), Busan 49111, Republic of Korea

<sup>2</sup>Department of Marine Biotechnology, University of Science and Technology (UST), Daejeon 34113,  
Republic of Korea

<sup>3</sup>Department of Radiation Oncology, Samsung Medical Center, Seoul 06351, Republic of Korea

## Table of contents

|                                                                                                                      |    |
|----------------------------------------------------------------------------------------------------------------------|----|
| <b>Figure S-1.</b> $^1\text{H}$ NMR spectrum of compound <b>1</b> ( $\text{CDCl}_3$ , 600 MHz).....                  | 6  |
| <b>Figure S-2.</b> $^{13}\text{C}$ NMR spectrum of compound <b>1</b> ( $\text{CDCl}_3$ , 150 MHz).....               | 6  |
| <b>Figure S-3.</b> HSQC spectrum of compound <b>1</b> ( $\text{CDCl}_3$ , 600 MHz). ....                             | 7  |
| <b>Figure S-4.</b> $^1\text{H}$ - $^1\text{H}$ COSY spectrum of compound <b>1</b> ( $\text{CDCl}_3$ , 600 MHz).....  | 7  |
| <b>Figure S-5.</b> HMBC spectrum of compound <b>1</b> ( $\text{CDCl}_3$ , 600 MHz). ....                             | 8  |
| <b>Figure S-6.</b> NOESY spectrum of compound <b>1</b> ( $\text{CDCl}_3$ , 600 MHz).....                             | 8  |
| <b>Figure S-7.</b> HRMS spectrum of compound <b>1</b> . ....                                                         | 8  |
| <b>Figure S-8.</b> $^1\text{H}$ NMR spectrum of compound <b>2</b> ( $\text{CDCl}_3$ , 600 MHz).....                  | 9  |
| <b>Figure S-9.</b> $^{13}\text{C}$ NMR spectrum of compound <b>2</b> ( $\text{CDCl}_3$ , 150 MHz).....               | 9  |
| <b>Figure S-10.</b> HSQC spectrum of compound <b>2</b> ( $\text{CDCl}_3$ , 600 MHz). ....                            | 10 |
| <b>Figure S-11.</b> $^1\text{H}$ - $^1\text{H}$ COSY spectrum of compound <b>2</b> ( $\text{CDCl}_3$ , 600 MHz)..... | 10 |
| <b>Figure S-12.</b> HMBC spectrum of compound <b>2</b> ( $\text{CDCl}_3$ , 600 MHz). ....                            | 11 |
| <b>Figure S-13.</b> NOESY spectrum of compound <b>2</b> ( $\text{CDCl}_3$ , 600 MHz).....                            | 11 |
| <b>Figure S-14.</b> HRMS spectrum of compound <b>2</b> . ....                                                        | 11 |
| <b>Figure S-15.</b> $^1\text{H}$ NMR spectrum of compound <b>3</b> ( $\text{CDCl}_3$ , 600 MHz).....                 | 12 |
| <b>Figure S-16.</b> $^{13}\text{C}$ NMR spectrum of compound <b>3</b> ( $\text{CDCl}_3$ , 150 MHz).....              | 12 |
| <b>Figure S-17.</b> HSQC spectrum of compound <b>3</b> ( $\text{CDCl}_3$ , 600 MHz). ....                            | 13 |
| <b>Figure S-18.</b> $^1\text{H}$ - $^1\text{H}$ COSY spectrum of compound <b>3</b> ( $\text{CDCl}_3$ , 600 MHz)..... | 13 |
| <b>Figure S-19.</b> HMBC spectrum of compound <b>3</b> ( $\text{CDCl}_3$ , 600 MHz). ....                            | 14 |
| <b>Figure S-20.</b> NOESY spectrum of compound <b>3</b> ( $\text{CDCl}_3$ , 600 MHz).....                            | 14 |
| <b>Figure S-21.</b> HRMS spectrum of compound <b>3</b> . ....                                                        | 14 |
| <b>Figure S-22.</b> $^1\text{H}$ NMR spectrum of compound <b>4</b> ( $\text{CDCl}_3$ , 600 MHz).....                 | 15 |
| <b>Figure S-23.</b> $^{13}\text{C}$ NMR spectrum of compound <b>4</b> ( $\text{CDCl}_3$ , 150 MHz).....              | 15 |
| <b>Figure S-24.</b> HSQC spectrum of compound <b>4</b> ( $\text{CDCl}_3$ , 600 MHz). ....                            | 16 |
| <b>Figure S-25.</b> $^1\text{H}$ - $^1\text{H}$ COSY spectrum of compound <b>4</b> ( $\text{CDCl}_3$ , 600 MHz)..... | 16 |
| <b>Figure S-26.</b> HMBC spectrum of compound <b>4</b> ( $\text{CDCl}_3$ , 600 MHz). ....                            | 17 |
| <b>Figure S-27.</b> NOESY spectrum of compound <b>4</b> ( $\text{CDCl}_3$ , 600 MHz).....                            | 17 |
| <b>Figure S-28.</b> HRMS spectrum of compound <b>4</b> . ....                                                        | 17 |
| <b>Figure S-29.</b> $^1\text{H}$ NMR spectrum of compound <b>5</b> ( $\text{CDCl}_3$ , 600 MHz).....                 | 18 |
| <b>Figure S-30.</b> $^{13}\text{C}$ NMR spectrum of compound <b>5</b> ( $\text{CDCl}_3$ , 150 MHz).....              | 18 |
| <b>Figure S-31.</b> HSQC spectrum of compound <b>5</b> ( $\text{CDCl}_3$ , 600 MHz). ....                            | 19 |
| <b>Figure S-32.</b> $^1\text{H}$ - $^1\text{H}$ COSY spectrum of compound <b>5</b> ( $\text{CDCl}_3$ , 600 MHz)..... | 19 |
| <b>Figure S-33.</b> HMBC spectrum of compound <b>5</b> ( $\text{CDCl}_3$ , 600 MHz). ....                            | 20 |
| <b>Figure S-34.</b> NOESY spectrum of compound <b>5</b> ( $\text{CDCl}_3$ , 600 MHz).....                            | 20 |
| <b>Figure S-35.</b> HRMS spectrum of compound <b>5</b> . ....                                                        | 20 |

|                                                                                                                       |    |
|-----------------------------------------------------------------------------------------------------------------------|----|
| <b>Figure S-36.</b> $^1\text{H}$ NMR spectrum of compound <b>6</b> ( $\text{CDCl}_3$ , 600 MHz).....                  | 21 |
| <b>Figure S-37.</b> $^{13}\text{C}$ NMR spectrum of compound <b>6</b> ( $\text{CDCl}_3$ , 150 MHz).....               | 21 |
| <b>Figure S-38.</b> HSQC spectrum of compound <b>6</b> ( $\text{CDCl}_3$ , 600 MHz). ....                             | 22 |
| <b>Figure S-39.</b> $^1\text{H}$ - $^1\text{H}$ COSY spectrum of compound <b>6</b> ( $\text{CDCl}_3$ , 600 MHz).....  | 22 |
| <b>Figure S-40.</b> HMBC spectrum of compound <b>6</b> ( $\text{CDCl}_3$ , 600 MHz). ....                             | 23 |
| <b>Figure S-41.</b> NOESY spectrum of compound <b>6</b> ( $\text{CDCl}_3$ , 600 MHz).....                             | 23 |
| <b>Figure S-42.</b> HRMS spectrum of compound <b>6</b> . ....                                                         | 23 |
| <b>Figure S-43.</b> $^1\text{H}$ NMR spectrum of compound <b>7</b> ( $\text{CDCl}_3$ , 600 MHz).....                  | 24 |
| <b>Figure S-44.</b> $^{13}\text{C}$ NMR spectrum of compound <b>7</b> ( $\text{CDCl}_3$ , 150 MHz).....               | 24 |
| <b>Figure S-45.</b> HSQC spectrum of compound <b>7</b> ( $\text{CDCl}_3$ , 600 MHz). ....                             | 25 |
| <b>Figure S-46.</b> $^1\text{H}$ - $^1\text{H}$ COSY spectrum of compound <b>7</b> ( $\text{CDCl}_3$ , 600 MHz).....  | 25 |
| <b>Figure S-47.</b> HMBC spectrum of compound <b>7</b> ( $\text{CDCl}_3$ , 600 MHz). ....                             | 26 |
| <b>Figure S-48.</b> NOESY spectrum of compound <b>7</b> ( $\text{CDCl}_3$ , 600 MHz).....                             | 26 |
| <b>Figure S-49.</b> HRMS spectrum of compound <b>7</b> . ....                                                         | 26 |
| <b>Figure S-50.</b> $^1\text{H}$ NMR spectrum of compound <b>8</b> ( $\text{CDCl}_3$ , 600 MHz).....                  | 27 |
| <b>Figure S-51.</b> $^{13}\text{C}$ NMR spectrum of compound <b>8</b> ( $\text{CDCl}_3$ , 150 MHz).....               | 27 |
| <b>Figure S-52.</b> HSQC spectrum of compound <b>8</b> ( $\text{CDCl}_3$ , 600 MHz). ....                             | 28 |
| <b>Figure S-53.</b> $^1\text{H}$ - $^1\text{H}$ COSY spectrum of compound <b>8</b> ( $\text{CDCl}_3$ , 600 MHz).....  | 28 |
| <b>Figure S-54.</b> HMBC spectrum of compound <b>8</b> ( $\text{CDCl}_3$ , 600 MHz). ....                             | 29 |
| <b>Figure S-55.</b> NOESY spectrum of compound <b>8</b> ( $\text{CDCl}_3$ , 600 MHz).....                             | 29 |
| <b>Figure S-56.</b> HRMS of compound <b>8</b> . ....                                                                  | 29 |
| <b>Figure S-57.</b> $^1\text{H}$ NMR spectrum of compound <b>9</b> ( $\text{CDCl}_3$ , 600 MHz).....                  | 30 |
| <b>Figure S-58.</b> $^{13}\text{C}$ NMR spectrum of compound <b>9</b> ( $\text{CDCl}_3$ , 150 MHz).....               | 30 |
| <b>Figure S-59.</b> HSQC spectrum of compound <b>9</b> ( $\text{CDCl}_3$ , 600 MHz). ....                             | 31 |
| <b>Figure S-60.</b> $^1\text{H}$ - $^1\text{H}$ COSY spectrum of compound <b>9</b> ( $\text{CDCl}_3$ , 600 MHz).....  | 31 |
| <b>Figure S-61.</b> HMBC spectrum of compound <b>9</b> ( $\text{CDCl}_3$ , 600 MHz). ....                             | 32 |
| <b>Figure S-62.</b> NOESY spectrum of compound <b>9</b> ( $\text{CDCl}_3$ , 600 MHz).....                             | 32 |
| <b>Figure S-63.</b> HRMS spectrum of compound <b>9</b> . ....                                                         | 32 |
| <b>Figure S-64.</b> $^1\text{H}$ NMR spectrum of compound <b>10</b> ( $\text{CDCl}_3$ , 600 MHz).....                 | 33 |
| <b>Figure S-65.</b> $^{13}\text{C}$ NMR spectrum of compound <b>10</b> ( $\text{CDCl}_3$ , 150 MHz).....              | 33 |
| <b>Figure S-66.</b> HSQC spectrum of compound <b>10</b> ( $\text{CDCl}_3$ , 600 MHz). ....                            | 34 |
| <b>Figure S-67.</b> $^1\text{H}$ - $^1\text{H}$ COSY spectrum of compound <b>10</b> ( $\text{CDCl}_3$ , 600 MHz)..... | 34 |
| <b>Figure S-68.</b> HMBC spectrum of compound <b>10</b> ( $\text{CDCl}_3$ , 600 MHz). ....                            | 35 |
| <b>Figure S-69.</b> NOESY spectrum of compound <b>10</b> ( $\text{CDCl}_3$ , 600 MHz).....                            | 35 |
| <b>Figure S-70.</b> HRMS spectrum of compound <b>10</b> . ....                                                        | 35 |
| <b>Figure S-71.</b> $^1\text{H}$ NMR spectrum of compound <b>11</b> ( $\text{CDCl}_3$ , 600 MHz).....                 | 36 |
| <b>Figure S-72.</b> $^{13}\text{C}$ NMR spectrum of compound <b>11</b> ( $\text{CDCl}_3$ , 150 MHz).....              | 36 |

|                                                                                                                        |    |
|------------------------------------------------------------------------------------------------------------------------|----|
| <b>Figure S-73.</b> HSQC spectrum of compound <b>11</b> (CDCl <sub>3</sub> , 600 MHz).                                 | 37 |
| <b>Figure S-74.</b> <sup>1</sup> H- <sup>1</sup> H COSY spectrum of compound <b>11</b> (CDCl <sub>3</sub> , 600 MHz).  | 37 |
| <b>Figure S-75.</b> HMBC spectrum of compound <b>11</b> (CDCl <sub>3</sub> , 600 MHz).                                 | 38 |
| <b>Figure S-76.</b> NOESY spectrum of compound <b>11</b> (CDCl <sub>3</sub> , 600 MHz).                                | 38 |
| <b>Figure S-77.</b> HRMS spectrum of compound <b>11</b> .                                                              | 38 |
| <b>Figure S-78.</b> <sup>1</sup> H NMR spectrum of compound <b>12</b> (CDCl <sub>3</sub> , 600 MHz).                   | 39 |
| <b>Figure S-79.</b> <sup>13</sup> C NMR spectrum of compound <b>12</b> (CDCl <sub>3</sub> , 150 MHz).                  | 39 |
| <b>Figure S-80.</b> HSQC spectrum of compound <b>12</b> (CDCl <sub>3</sub> , 600 MHz).                                 | 40 |
| <b>Figure S-81.</b> <sup>1</sup> H- <sup>1</sup> H COSY spectrum of compound <b>12</b> (CDCl <sub>3</sub> , 600 MHz).  | 40 |
| <b>Figure S-82.</b> HMBC spectrum of compound <b>12</b> (CDCl <sub>3</sub> , 600 MHz).                                 | 41 |
| <b>Figure S-83.</b> NOESY spectrum of compound <b>12</b> (CDCl <sub>3</sub> , 600 MHz).                                | 41 |
| <b>Figure S-84.</b> HRMS spectrum of compound <b>12</b> .                                                              | 41 |
| <b>Figure S-85.</b> <sup>1</sup> H NMR spectrum of compound <b>13</b> (CDCl <sub>3</sub> , 600 MHz).                   | 42 |
| <b>Figure S-86.</b> <sup>13</sup> C NMR spectrum of compound <b>13</b> (CDCl <sub>3</sub> , 150 MHz).                  | 42 |
| <b>Figure S-87.</b> HSQC spectrum of compound <b>13</b> (CDCl <sub>3</sub> , 600 MHz).                                 | 43 |
| <b>Figure S-88.</b> <sup>1</sup> H- <sup>1</sup> H COSY spectrum of compound <b>13</b> (CDCl <sub>3</sub> , 600 MHz).  | 43 |
| <b>Figure S-89.</b> HMBC spectrum of compound <b>13</b> (CDCl <sub>3</sub> , 600 MHz).                                 | 44 |
| <b>Figure S-90.</b> NOESY spectrum of compound <b>13</b> (CDCl <sub>3</sub> , 600 MHz).                                | 44 |
| <b>Figure S-91.</b> HRMS spectrum of compound <b>13</b> .                                                              | 44 |
| <b>Figure S-92.</b> <sup>1</sup> H NMR spectrum of compound <b>14</b> (CDCl <sub>3</sub> , 600 MHz).                   | 45 |
| <b>Figure S-93.</b> <sup>13</sup> C NMR spectrum of compound <b>14</b> (CDCl <sub>3</sub> , 150 MHz).                  | 45 |
| <b>Figure S-94.</b> HSQC spectrum of compound <b>14</b> (CDCl <sub>3</sub> , 600 MHz).                                 | 46 |
| <b>Figure S-95.</b> <sup>1</sup> H- <sup>1</sup> H COSY spectrum of compound <b>14</b> (CDCl <sub>3</sub> , 600 MHz).  | 46 |
| <b>Figure S-96.</b> HMBC spectrum of compound <b>14</b> (CDCl <sub>3</sub> , 600 MHz).                                 | 47 |
| <b>Figure S-97.</b> NOESY spectrum of compound <b>14</b> (CDCl <sub>3</sub> , 600 MHz).                                | 47 |
| <b>Figure S-98.</b> HRMS spectrum of compound <b>14</b> .                                                              | 47 |
| <b>Figure S-99.</b> <sup>1</sup> H NMR spectrum of compound <b>15</b> (CDCl <sub>3</sub> , 600 MHz).                   | 48 |
| <b>Figure S-100.</b> <sup>13</sup> C NMR spectrum of compound <b>15</b> (CDCl <sub>3</sub> , 150 MHz).                 | 48 |
| <b>Figure S-101.</b> HSQC spectrum of compound <b>15</b> (CDCl <sub>3</sub> , 600 MHz).                                | 49 |
| <b>Figure S-102.</b> <sup>1</sup> H- <sup>1</sup> H COSY spectrum of compound <b>15</b> (CDCl <sub>3</sub> , 600 MHz). | 49 |
| <b>Figure S-103.</b> HMBC spectrum of compound <b>15</b> (CDCl <sub>3</sub> , 600 MHz).                                | 50 |
| <b>Figure S-104.</b> NOESY spectrum of compound <b>15</b> (CDCl <sub>3</sub> , 600 MHz).                               | 50 |
| <b>Figure S-105.</b> HRMS spectrum of compound <b>15</b> .                                                             | 50 |
| <b>Figure S-106.</b> <sup>1</sup> H NMR spectrum of compound <b>16</b> (CDCl <sub>3</sub> , 600 MHz).                  | 51 |
| <b>Figure S-107.</b> <sup>13</sup> C NMR spectrum of compound <b>16</b> (CDCl <sub>3</sub> , 150 MHz).                 | 51 |
| <b>Figure S-108.</b> HSQC spectrum of compound <b>16</b> (CDCl <sub>3</sub> , 600 MHz).                                | 52 |
| <b>Figure S-109.</b> <sup>1</sup> H- <sup>1</sup> H COSY spectrum of compound <b>16</b> (CDCl <sub>3</sub> , 600 MHz). | 52 |

|                                                                                               |    |
|-----------------------------------------------------------------------------------------------|----|
| <b>Figure S-110.</b> HMBC spectrum of compound <b>16</b> (CDCl <sub>3</sub> , 600 MHz). ..... | 53 |
| <b>Figure S-111.</b> NOESY spectrum of compound <b>16</b> (CDCl <sub>3</sub> , 600 MHz).....  | 53 |
| <b>Figure S-112.</b> HRMS spectrum of compound <b>16</b> . .....                              | 53 |

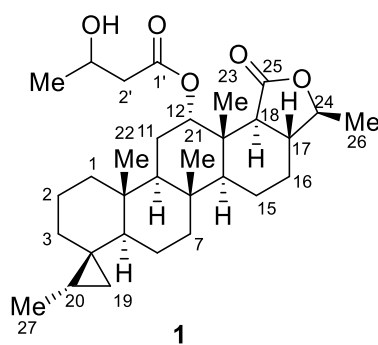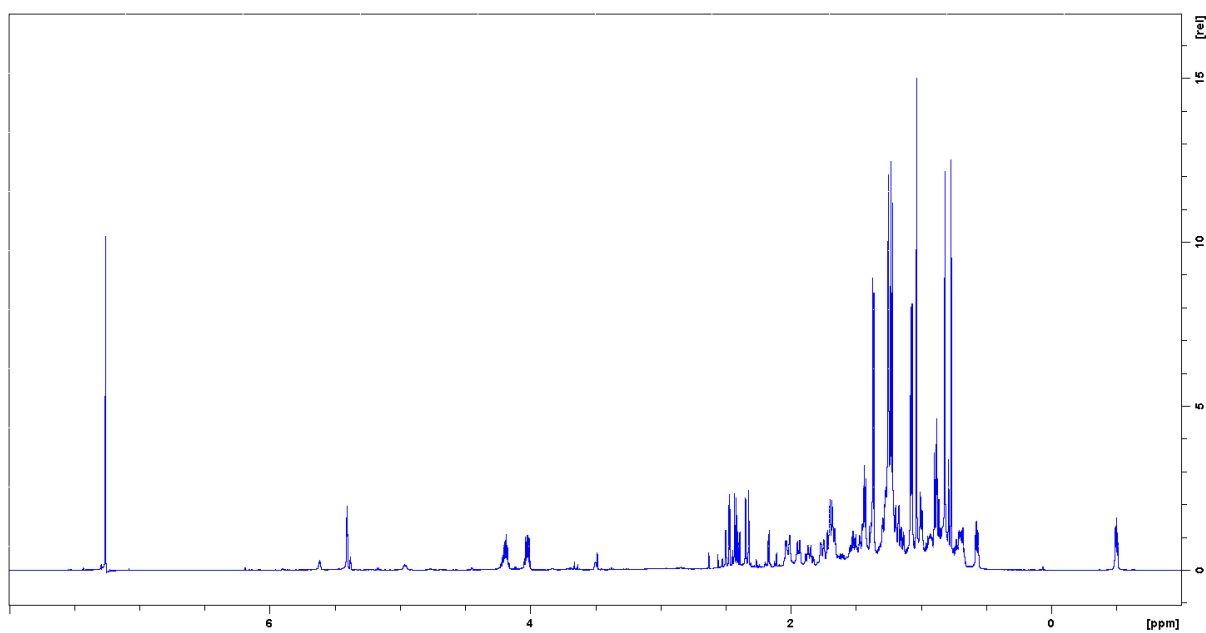

**Figure S-1.**  $^1\text{H}$  NMR spectrum of compound **1** ( $\text{CDCl}_3$ , 600 MHz).

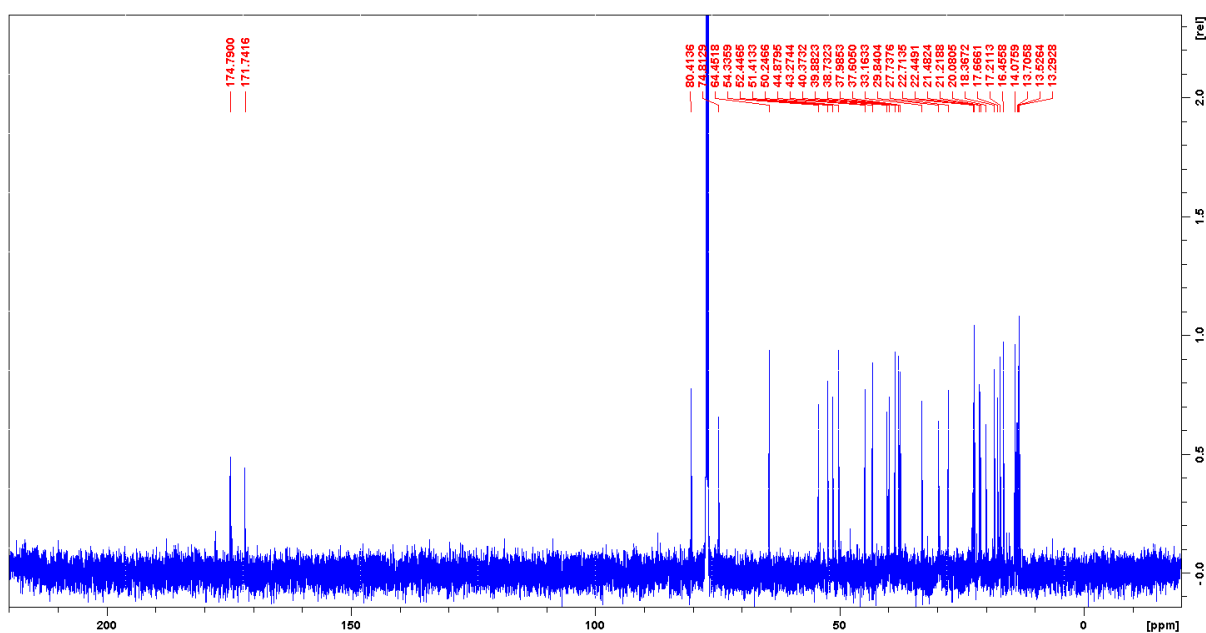

**Figure S-2.**  $^{13}\text{C}$  NMR spectrum of compound **1** ( $\text{CDCl}_3$ , 150 MHz).

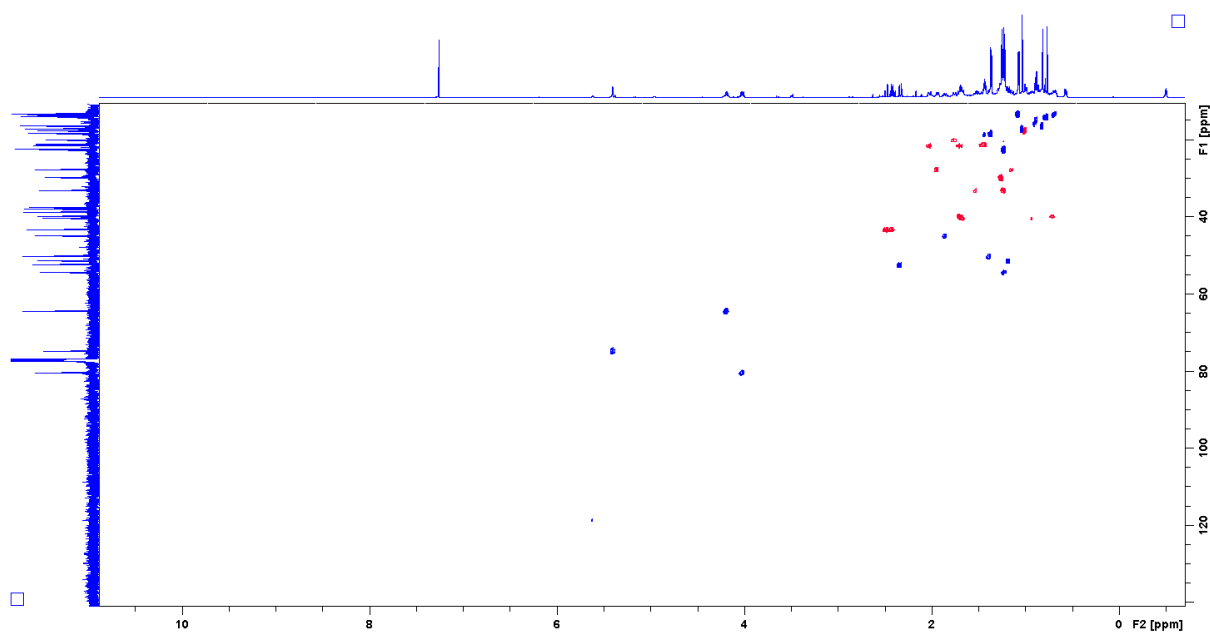

**Figure S-3.** HSQC spectrum of compound **1** (CDCl<sub>3</sub>, 600 MHz).

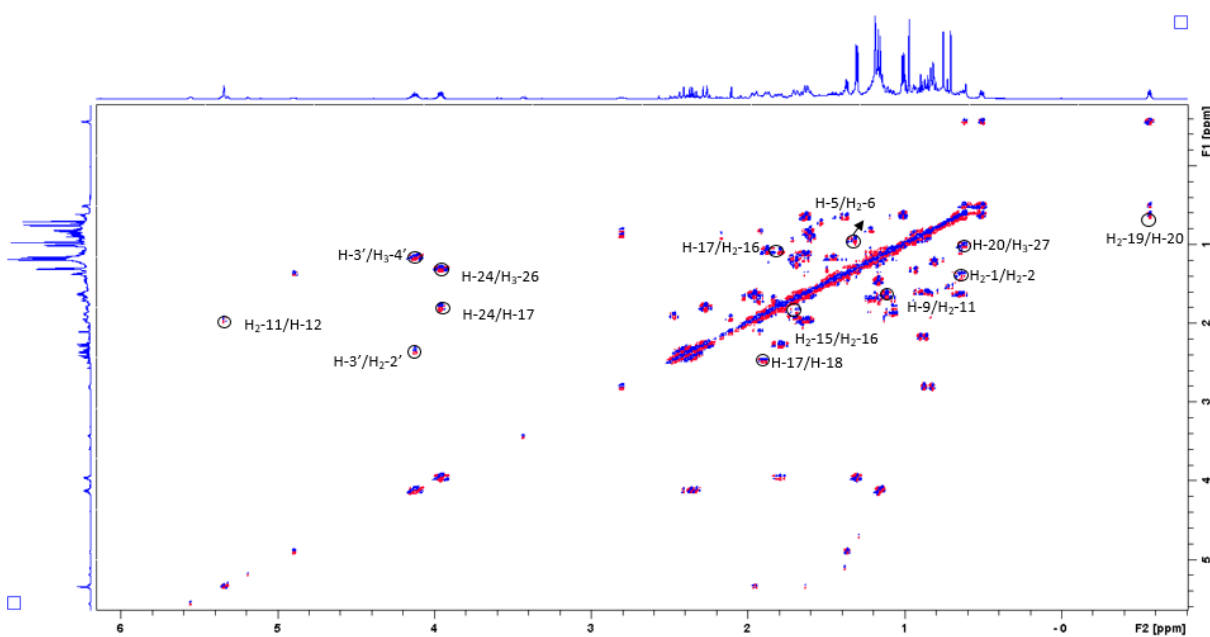

**Figure S-4.** <sup>1</sup>H-<sup>1</sup>H COSY spectrum of compound **1** (CDCl<sub>3</sub>, 600 MHz).

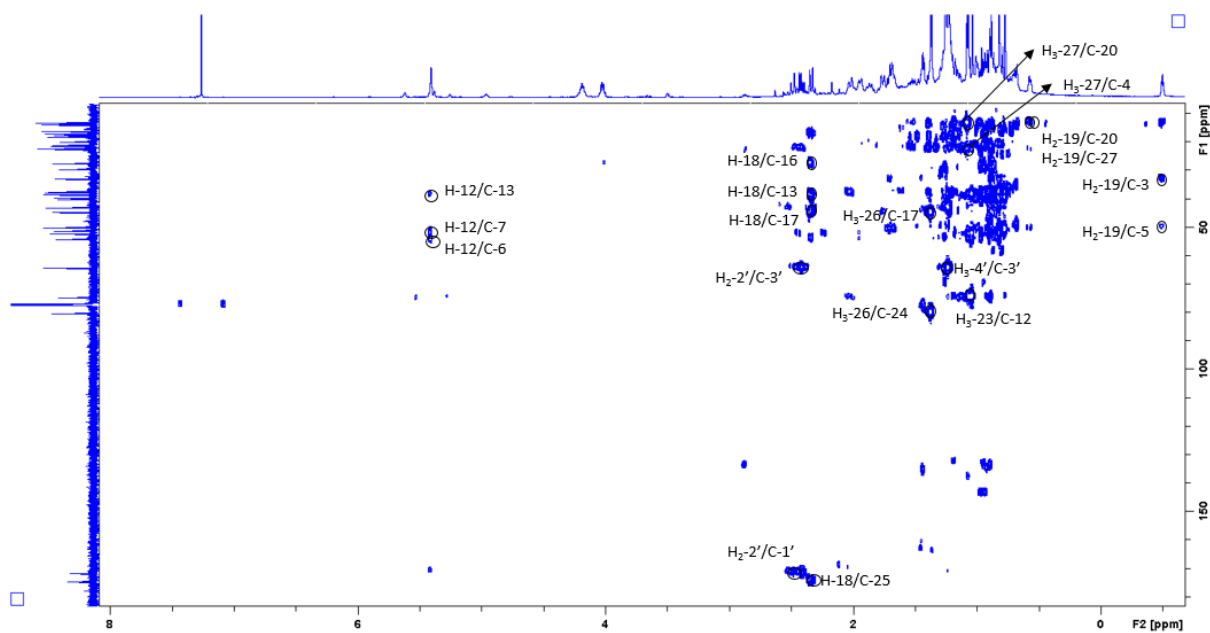

Figure S-5. HMBC spectrum of compound **1** (CDCl<sub>3</sub>, 600 MHz).

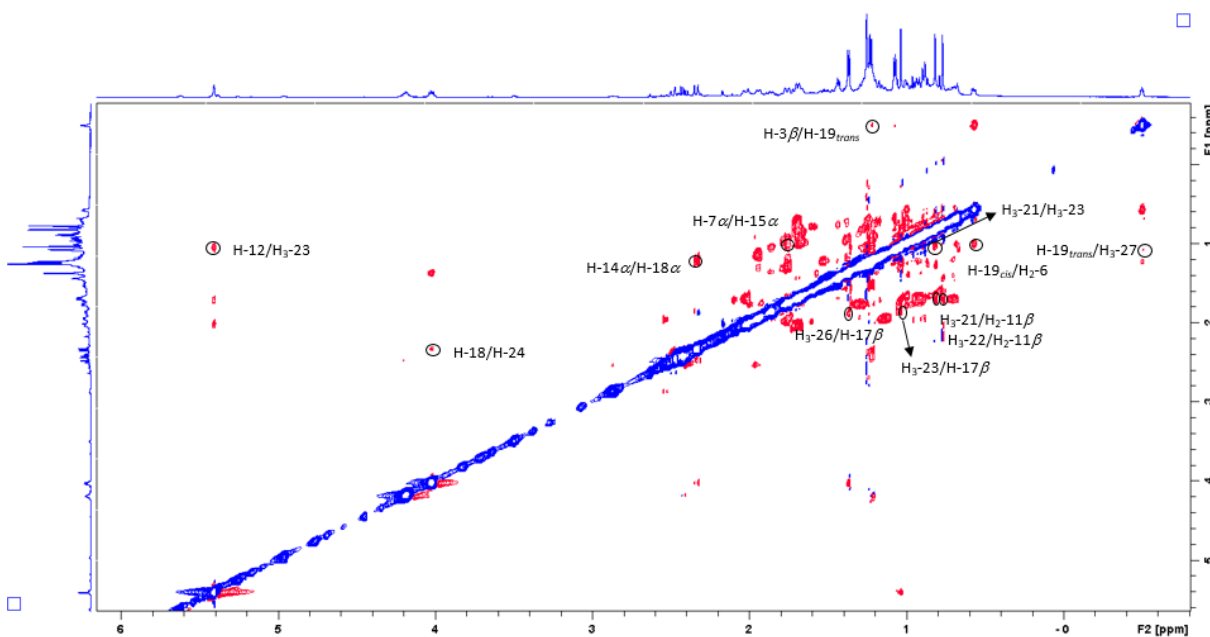

Figure S-6. NOESY spectrum of compound **1** (CDCl<sub>3</sub>, 600 MHz).

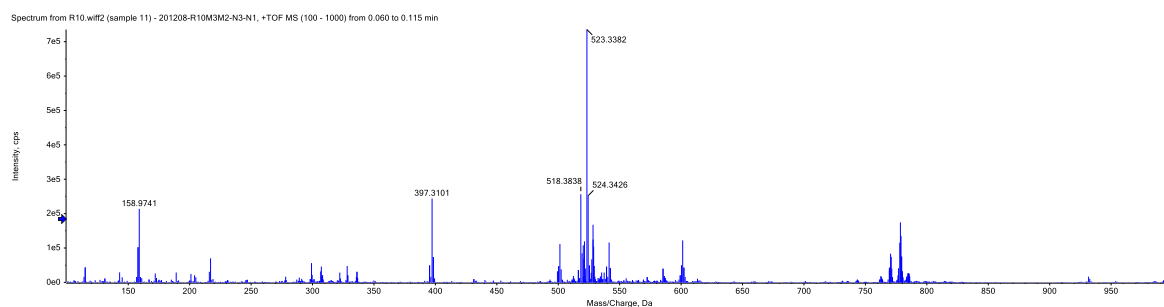

Figure S-7. HRMS spectrum of compound **1**.



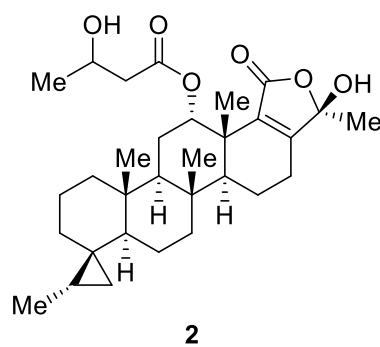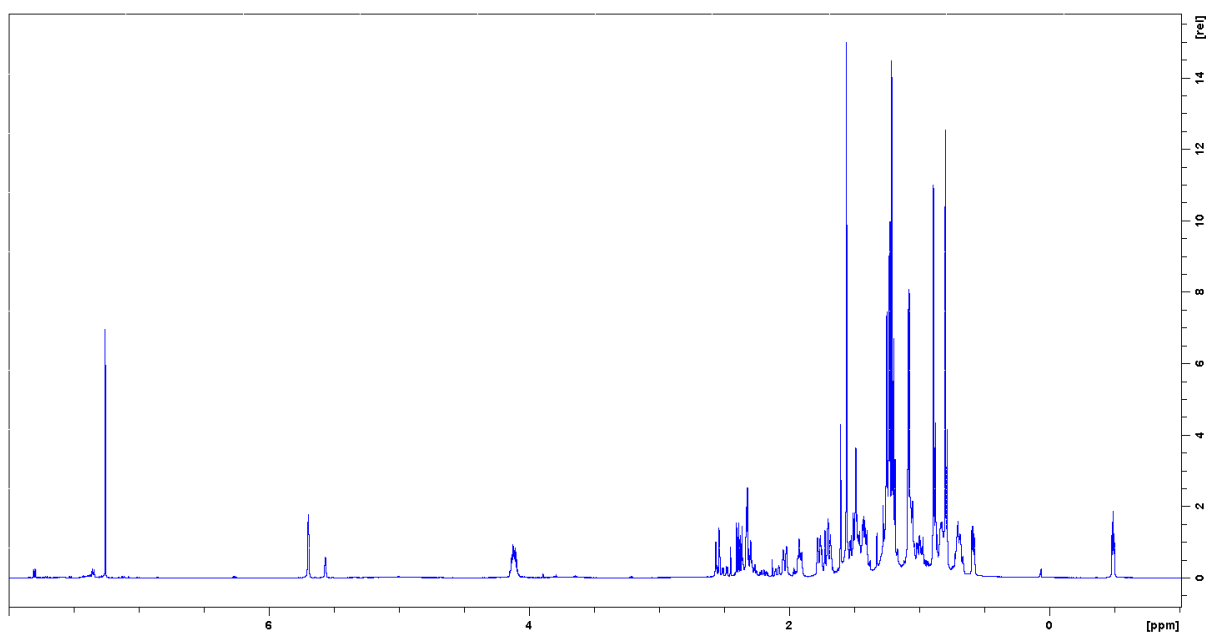

**Figure S-8.**  $^1\text{H}$  NMR spectrum of compound **2** ( $\text{CDCl}_3$ , 600 MHz).

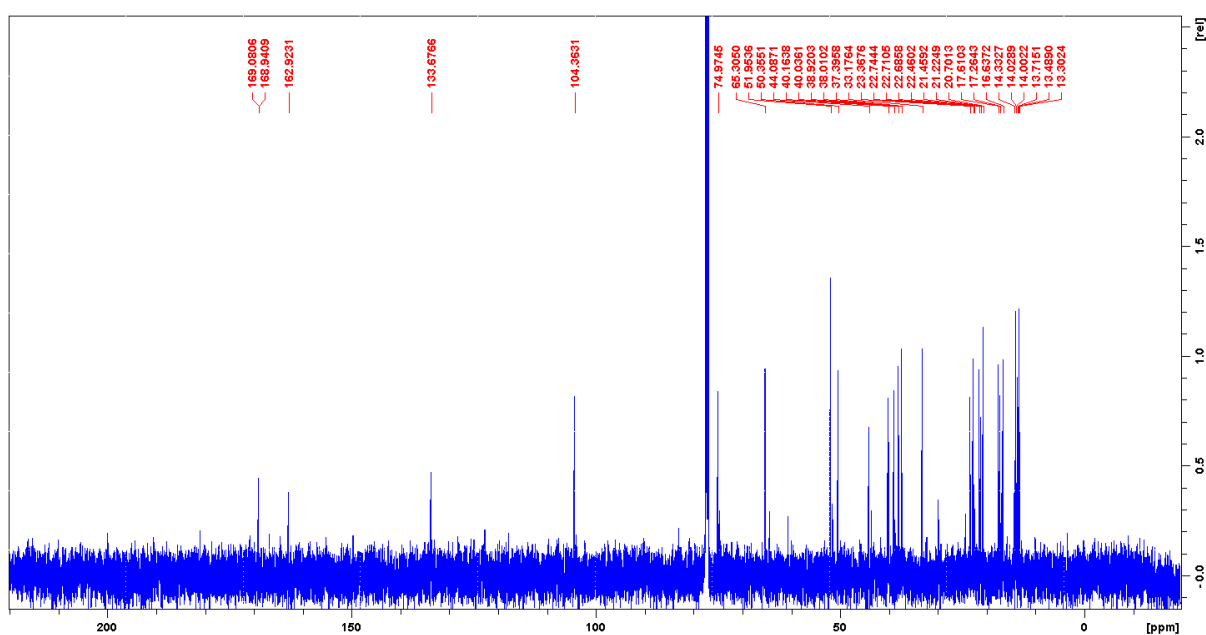

**Figure S-9.**  $^{13}\text{C}$  NMR spectrum of compound **2** ( $\text{CDCl}_3$ , 150 MHz).

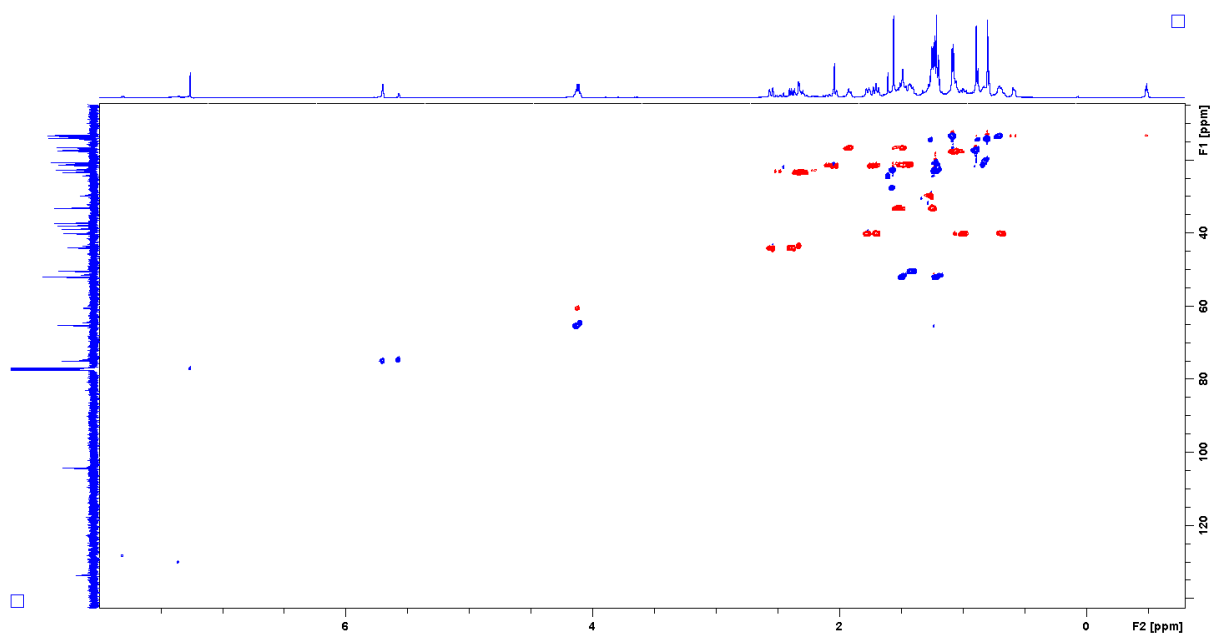

**Figure S-10.** HSQC spectrum of compound **2** (CDCl<sub>3</sub>, 600 MHz).

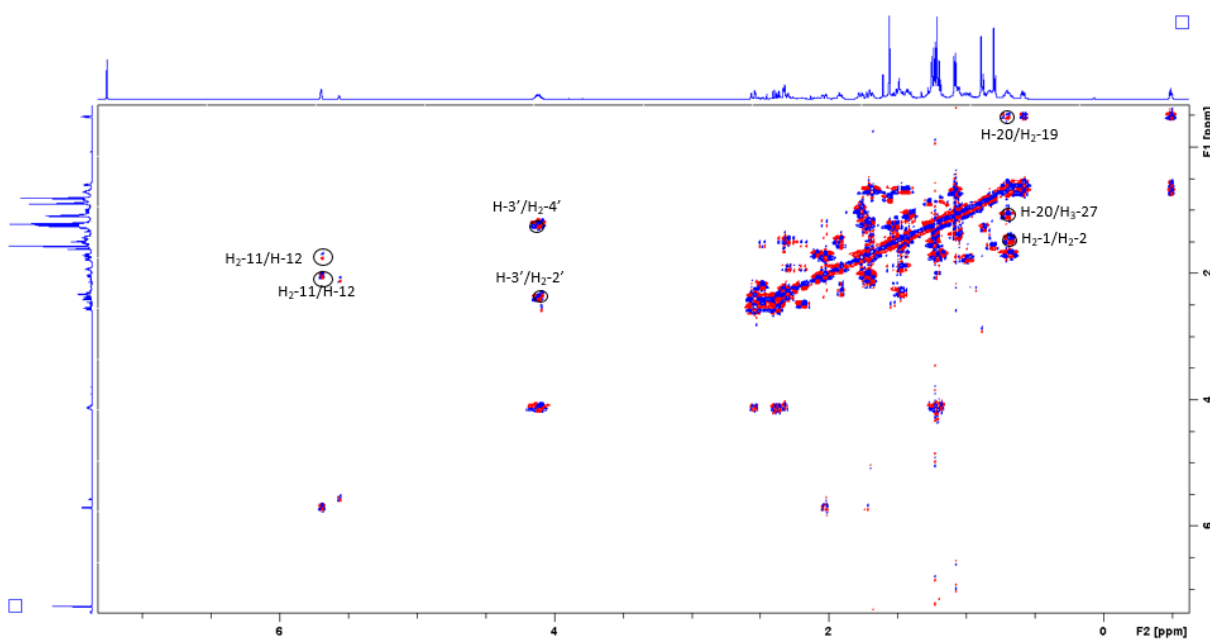

**Figure S-11.** <sup>1</sup>H-<sup>1</sup>H COSY spectrum of compound **2** (CDCl<sub>3</sub>, 600 MHz).

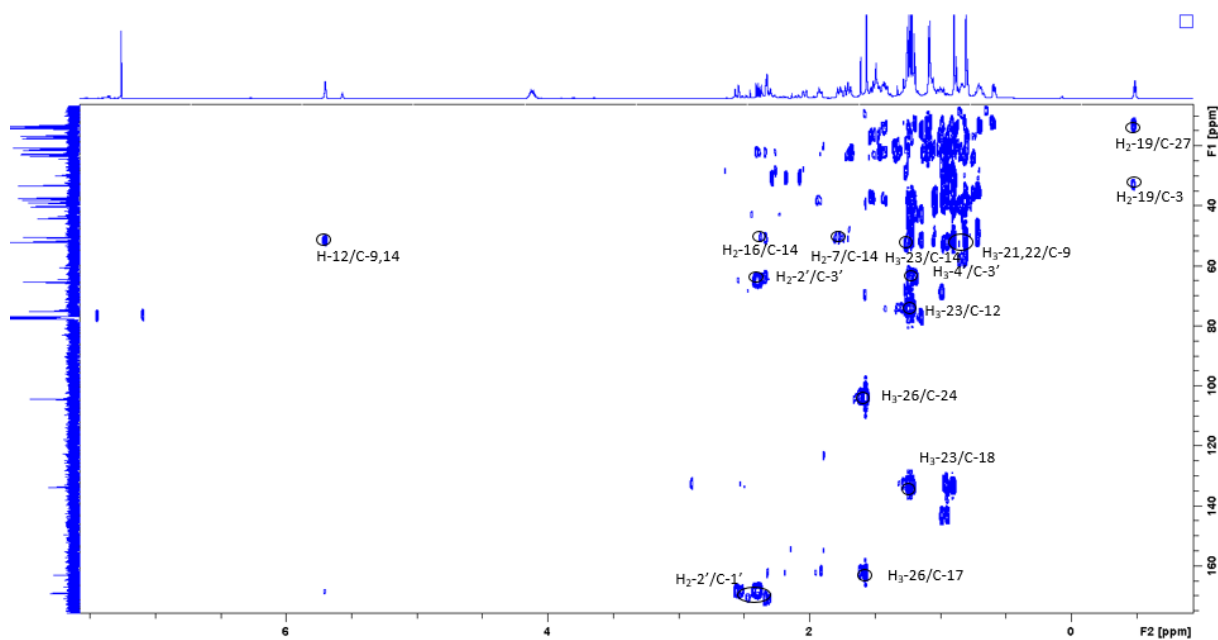

**Figure S-12.** HMBC spectrum of compound **2** (CDCl<sub>3</sub>, 600 MHz).

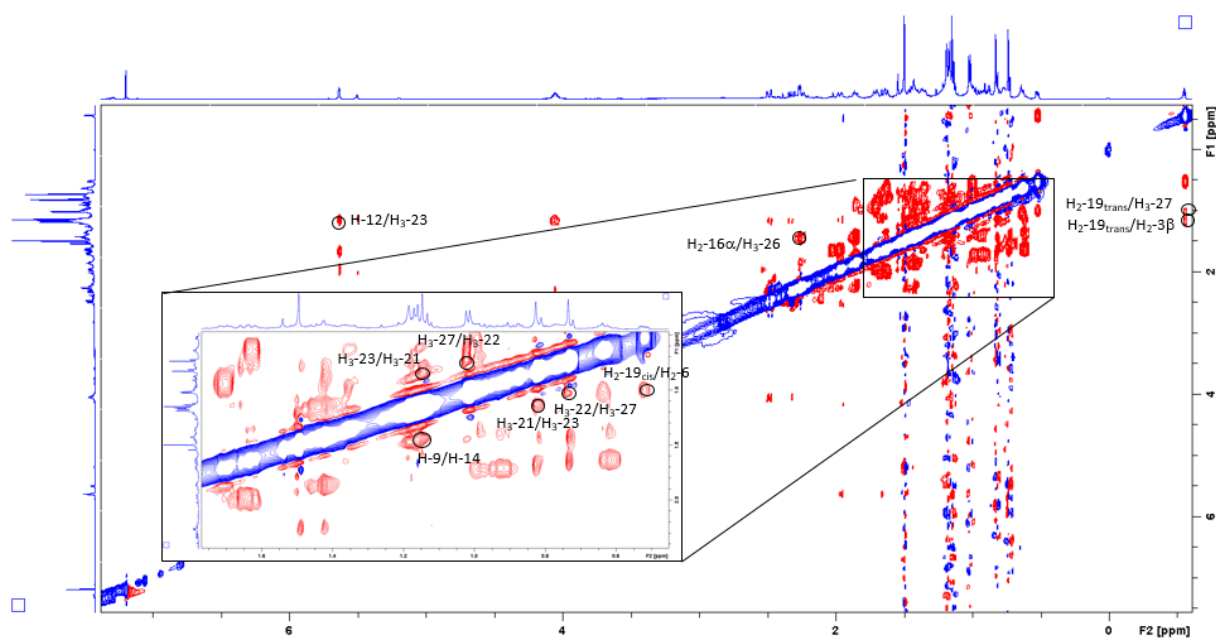

**Figure S-13.** NOESY spectrum of compound **2** (CDCl<sub>3</sub>, 600 MHz).

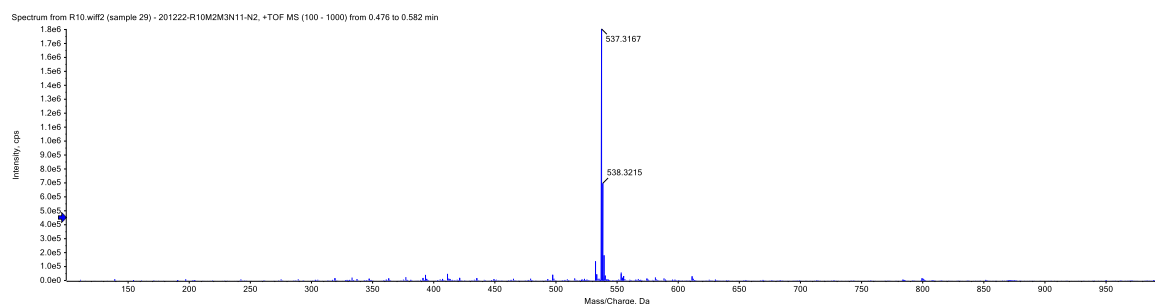

**Figure S-14.** HRMS spectrum of compound **2**.

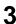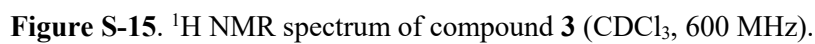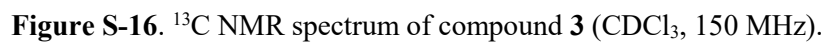

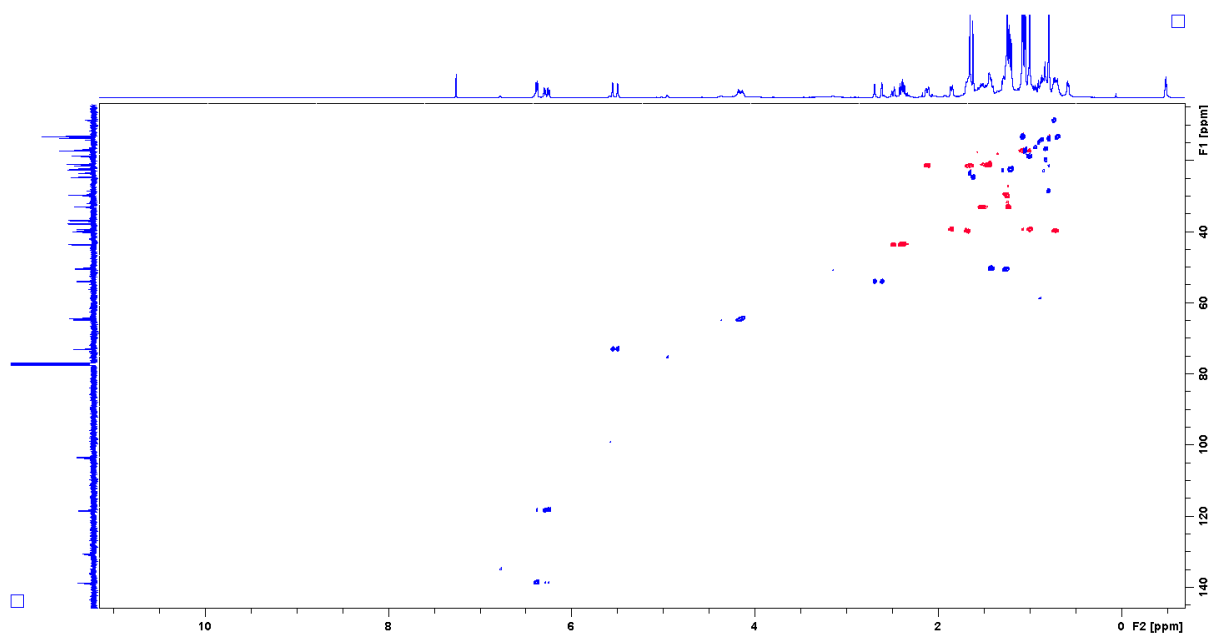

**Figure S-17.** HSQC spectrum of compound **3** (CDCl<sub>3</sub>, 600 MHz).

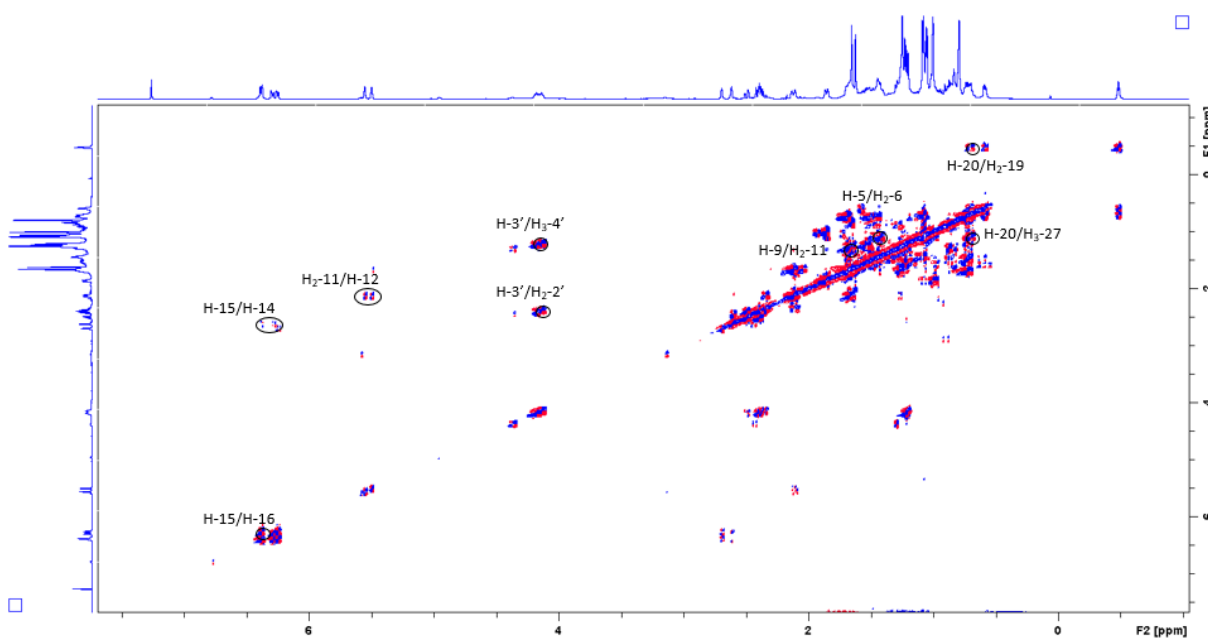

**Figure S-18.** <sup>1</sup>H-<sup>1</sup>H COSY spectrum of compound **3** (CDCl<sub>3</sub>, 600 MHz).

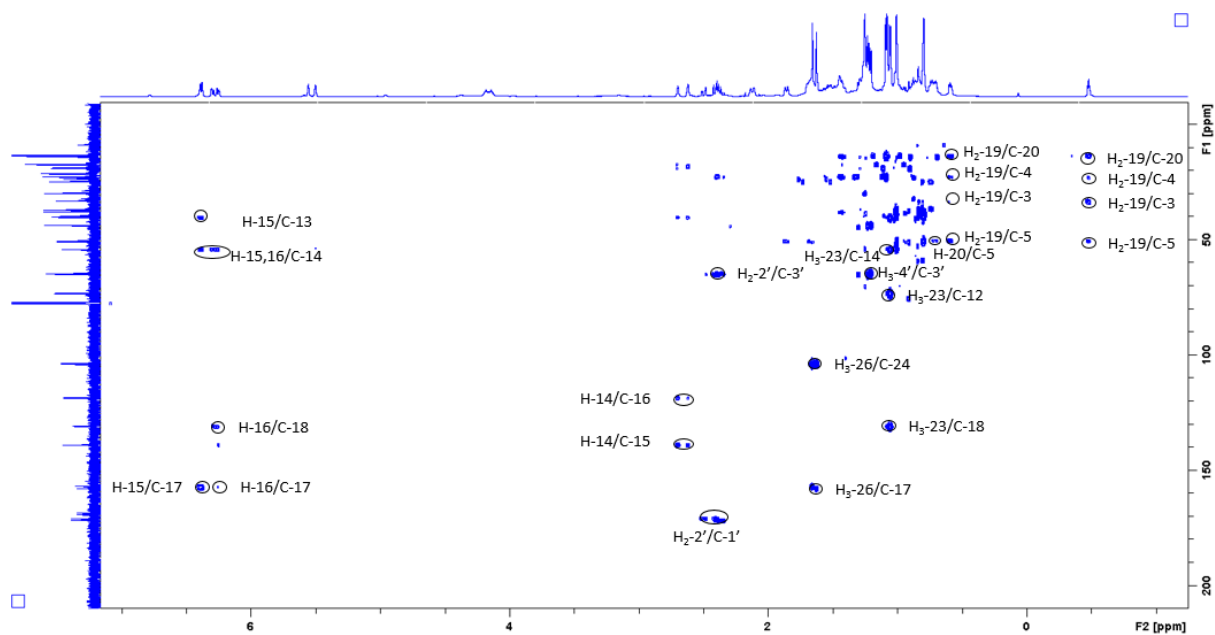

**Figure S-19.** HMBC spectrum of compound **3** (CDCl<sub>3</sub>, 600 MHz).

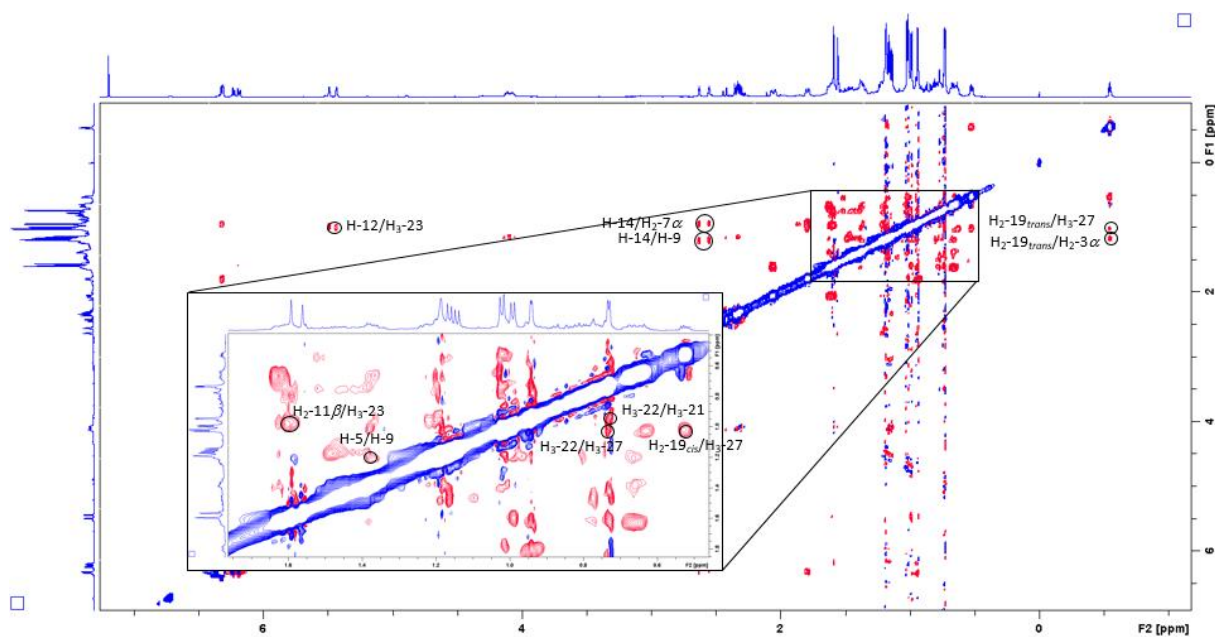

**Figure S-20.** NOESY spectrum of compound **3** (CDCl<sub>3</sub>, 600 MHz).

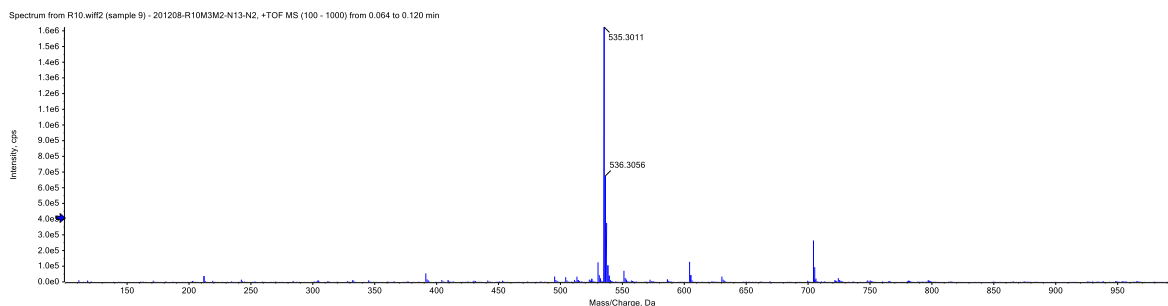

**Figure S-21.** HRMS spectrum of compound **3**.

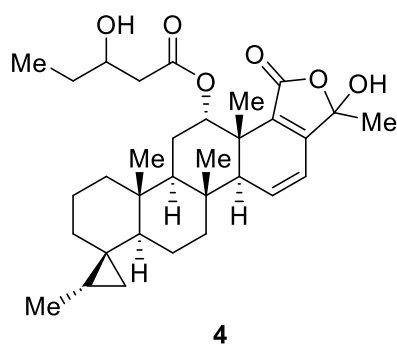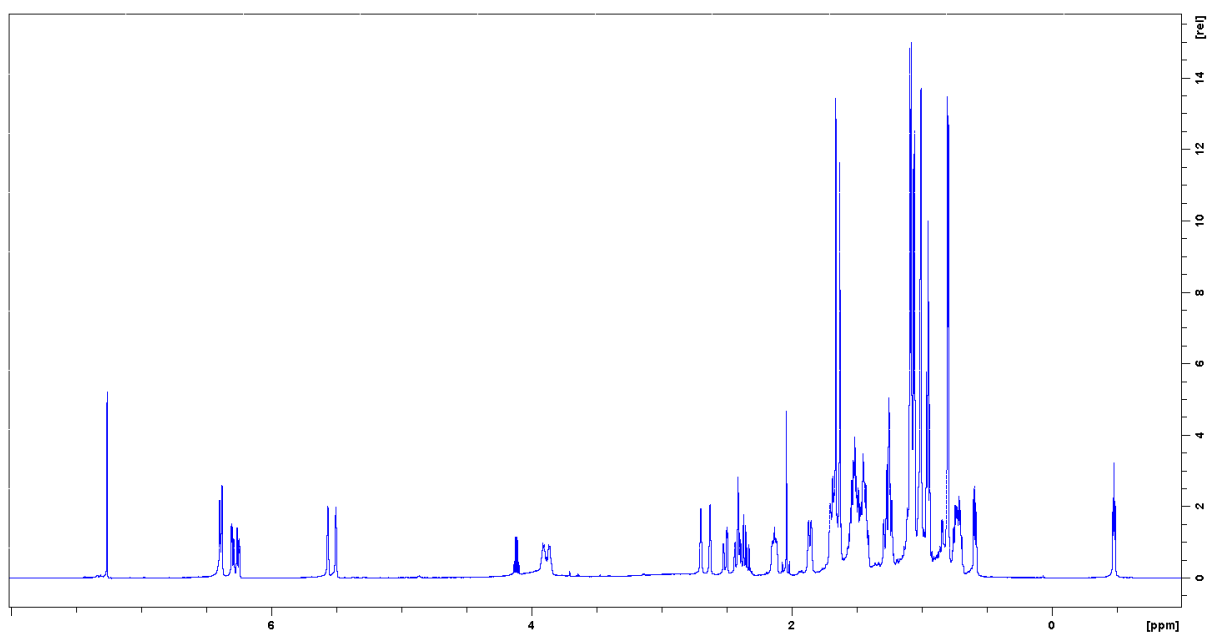

**Figure S-22.**  $^1\text{H}$  NMR spectrum of compound **4** ( $\text{CDCl}_3$ , 600 MHz).

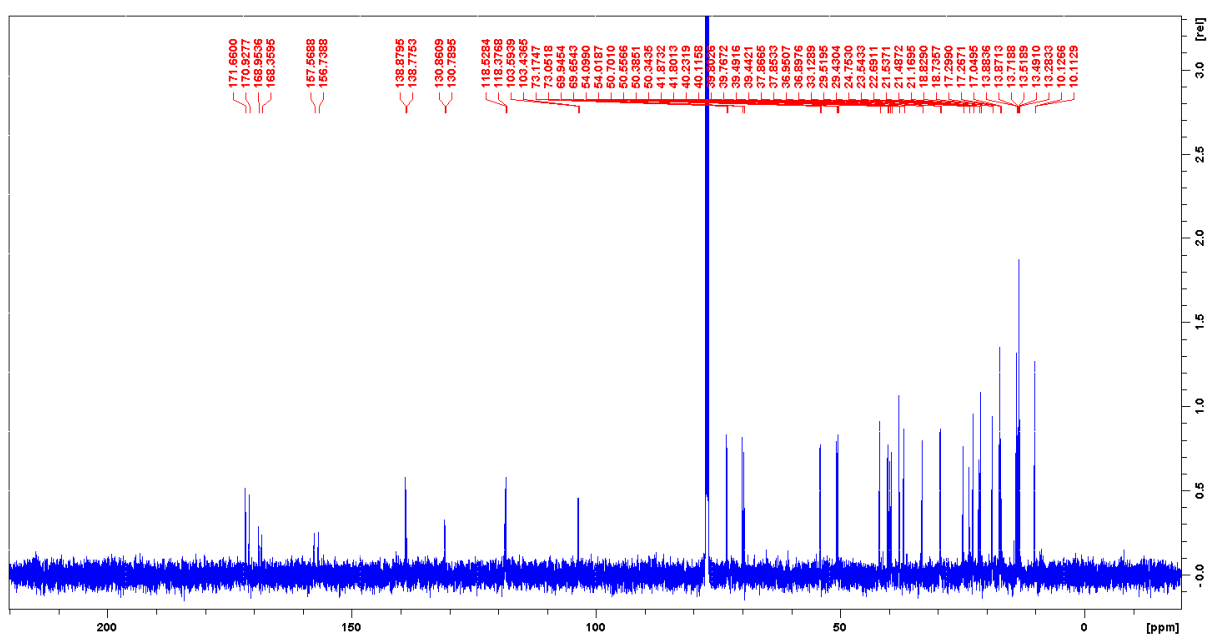

**Figure S-23.**  $^{13}\text{C}$  NMR spectrum of compound **4** ( $\text{CDCl}_3$ , 150 MHz).

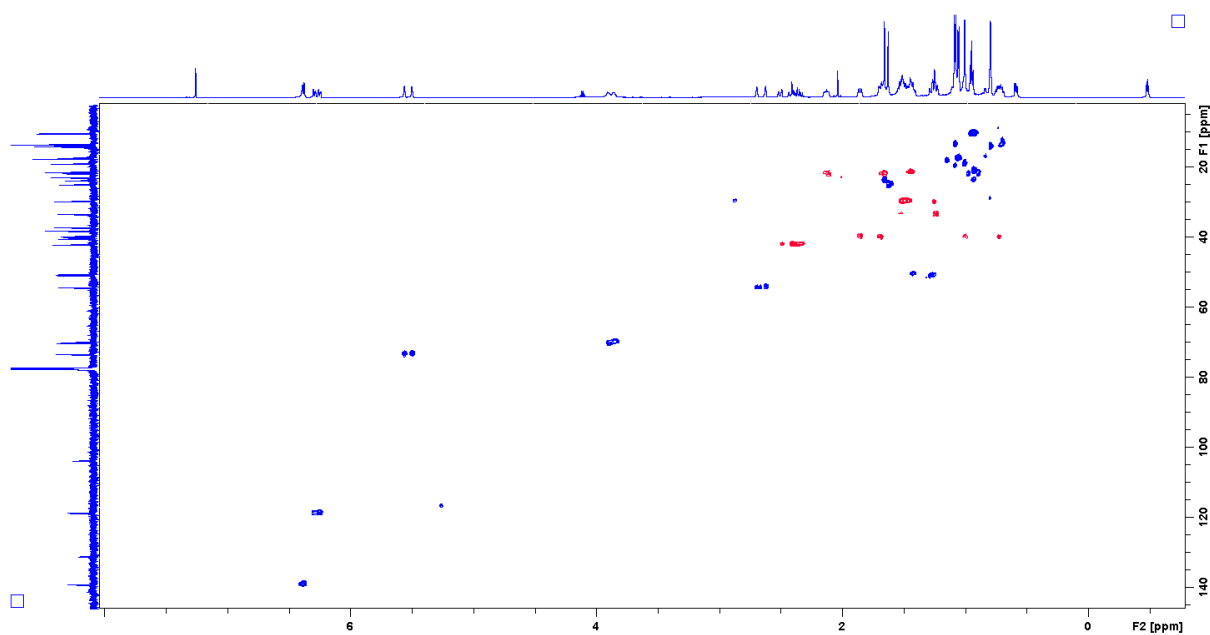

**Figure S-24.** HSQC spectrum of compound **4** (CDCl<sub>3</sub>, 600 MHz).

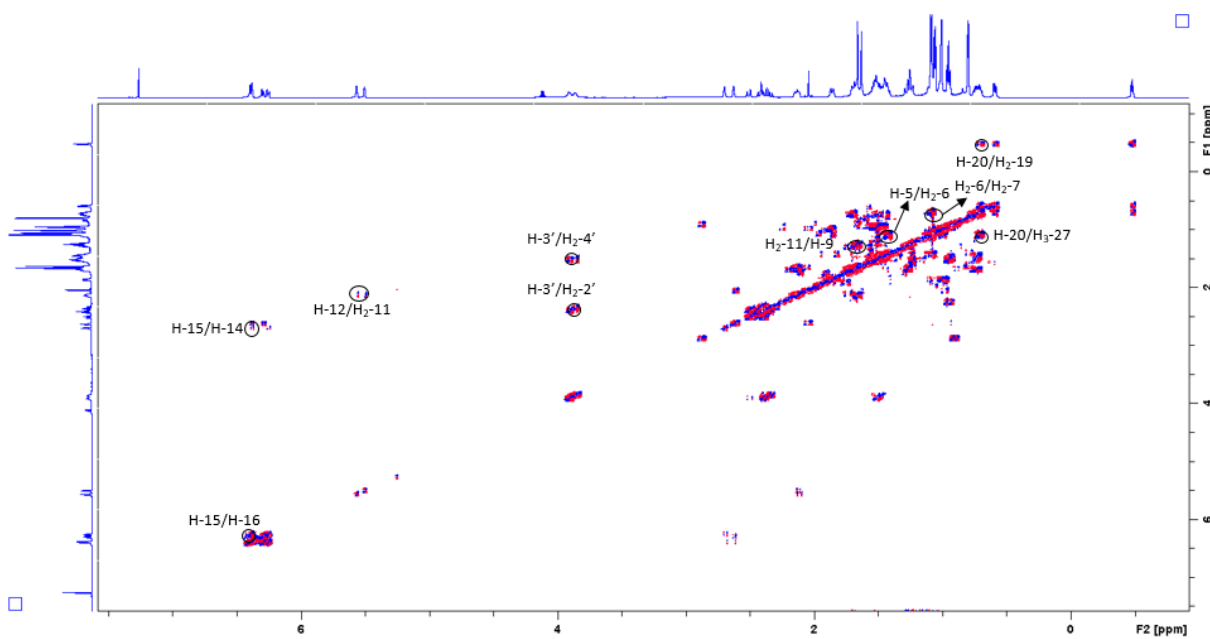

**Figure S-25.** <sup>1</sup>H-<sup>1</sup>H COSY spectrum of compound **4** (CDCl<sub>3</sub>, 600 MHz).



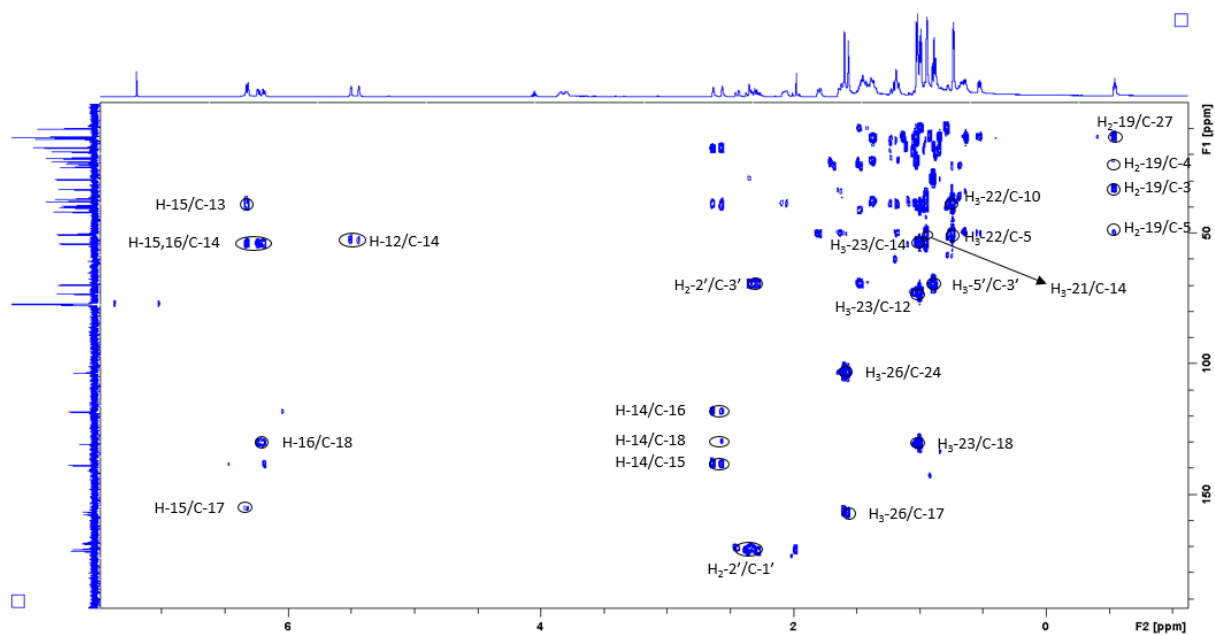

Figure S-26. HMBC spectrum of compound **4** (CDCl<sub>3</sub>, 600 MHz).

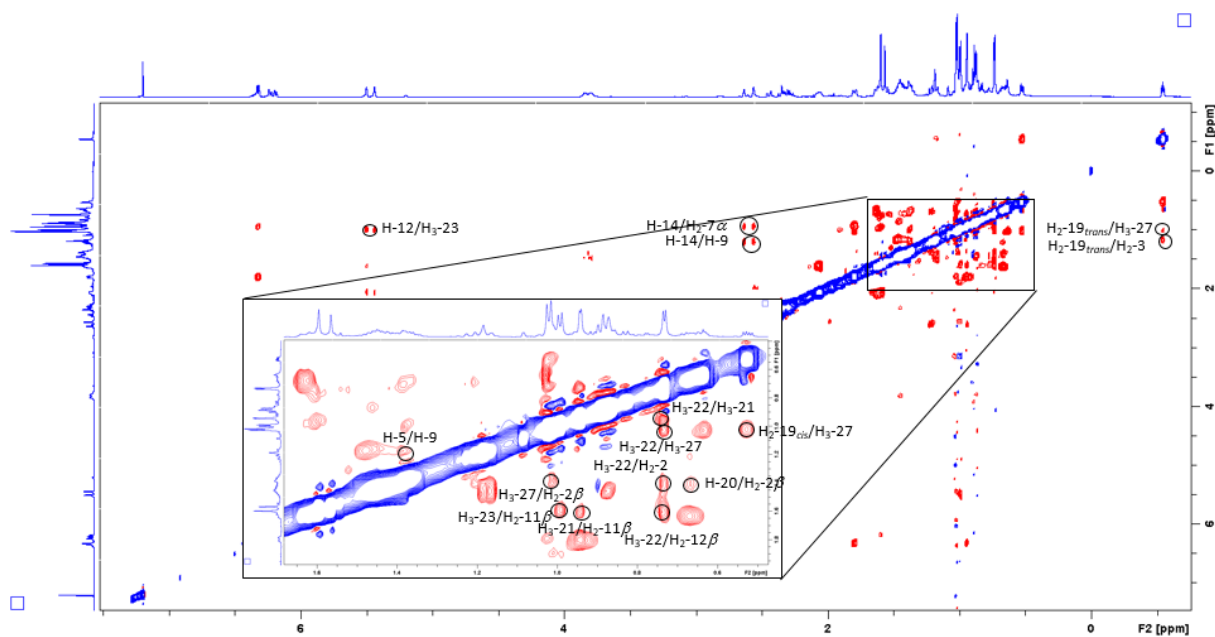

Figure S-27. NOESY spectrum of compound **4** (CDCl<sub>3</sub>, 600 MHz).

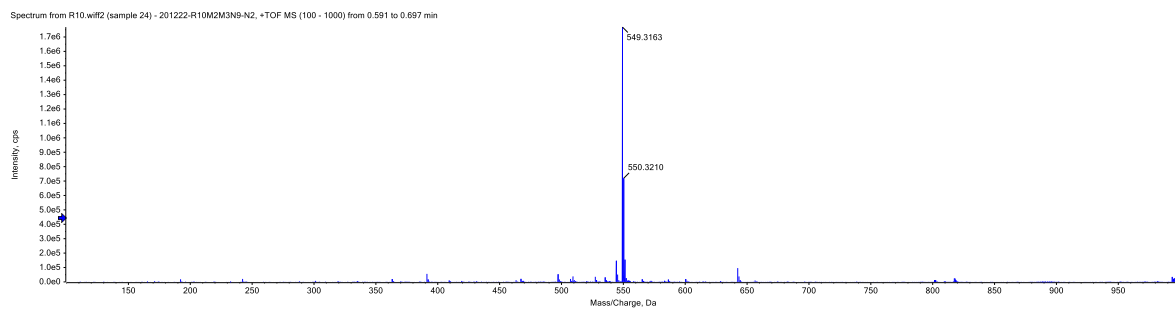

Figure S-28. HRMS spectrum of compound **4**.

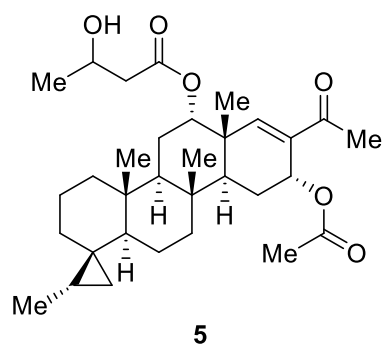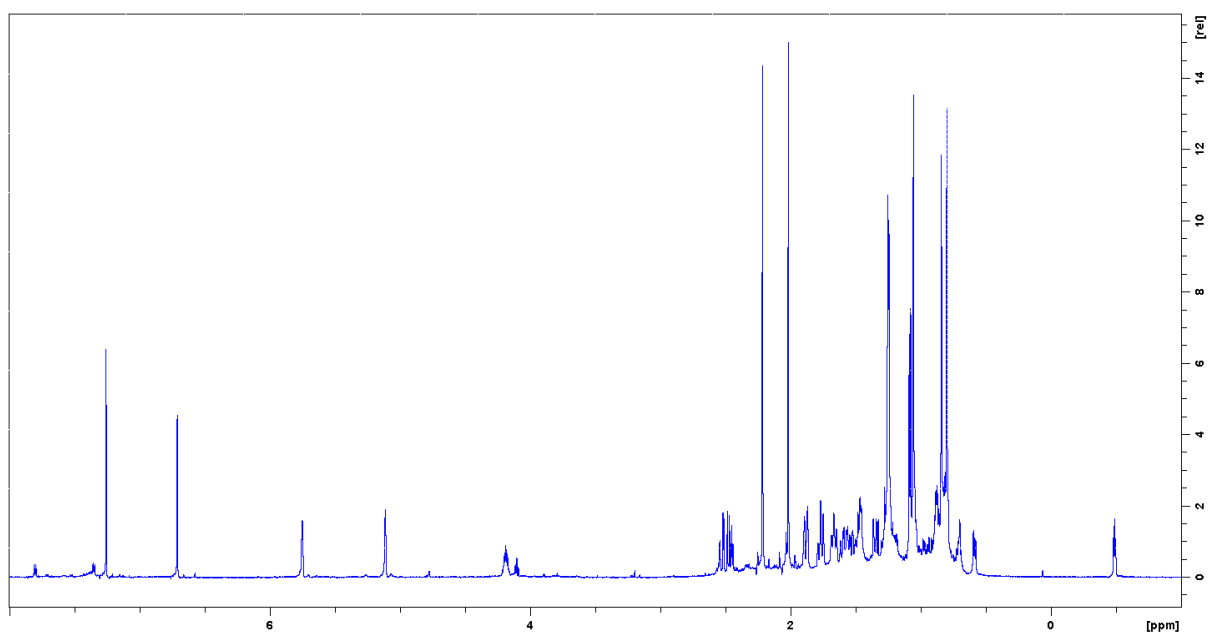

**Figure S-29.**  $^1\text{H}$  NMR spectrum of compound **5** ( $\text{CDCl}_3$ , 600 MHz).

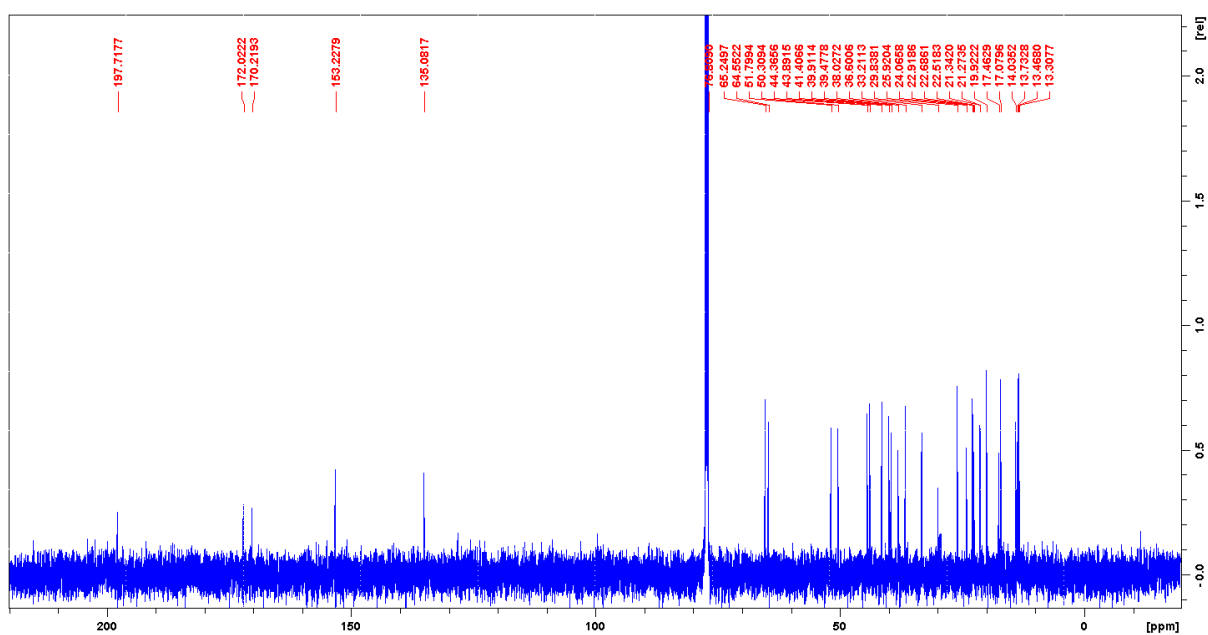

**Figure S-30.**  $^{13}\text{C}$  NMR spectrum of compound **5** ( $\text{CDCl}_3$ , 150 MHz).

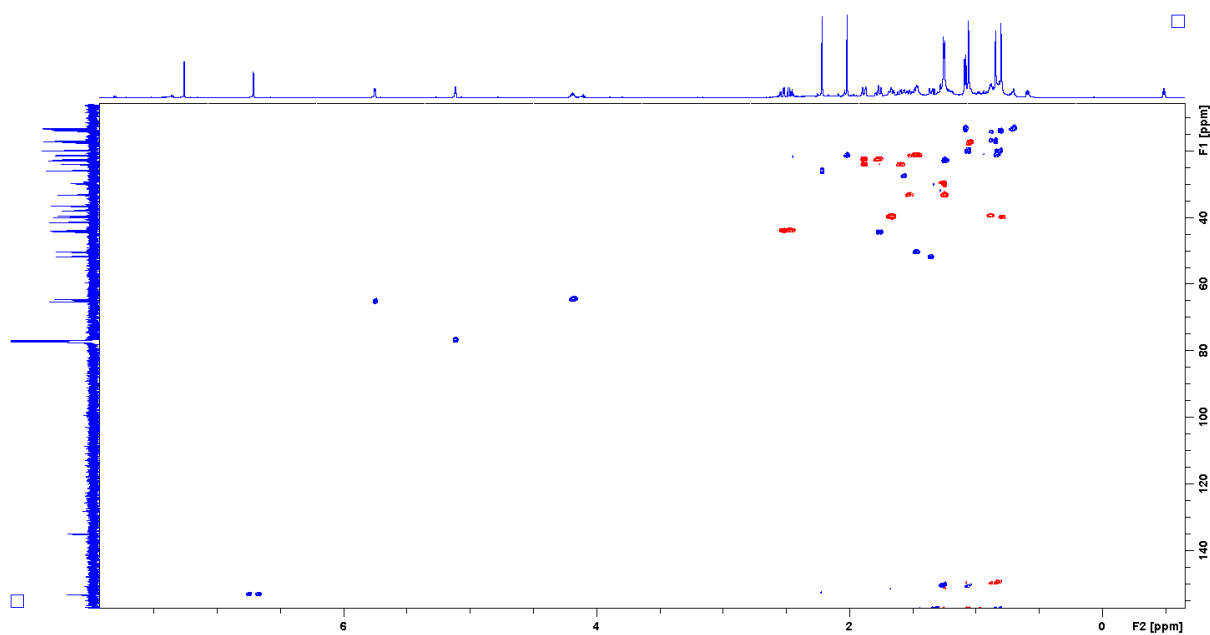

**Figure S-31.** HSQC spectrum of compound **5** (CDCl<sub>3</sub>, 600 MHz).

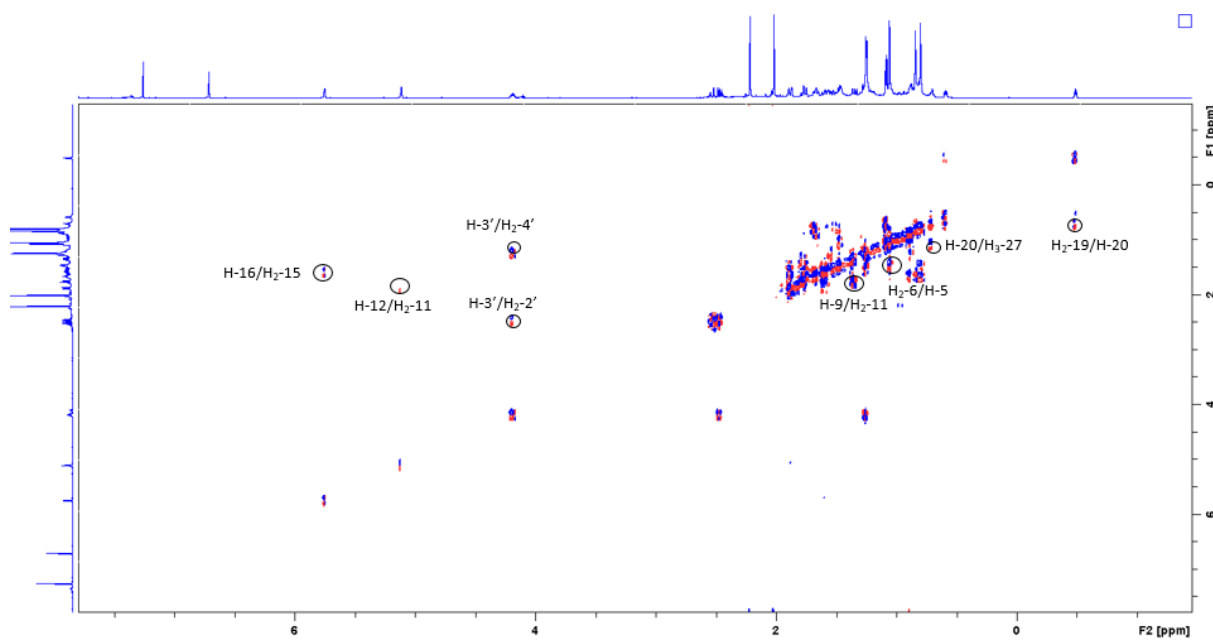

**Figure S-32.** <sup>1</sup>H-<sup>1</sup>H COSY spectrum of compound **5** (CDCl<sub>3</sub>, 600 MHz).

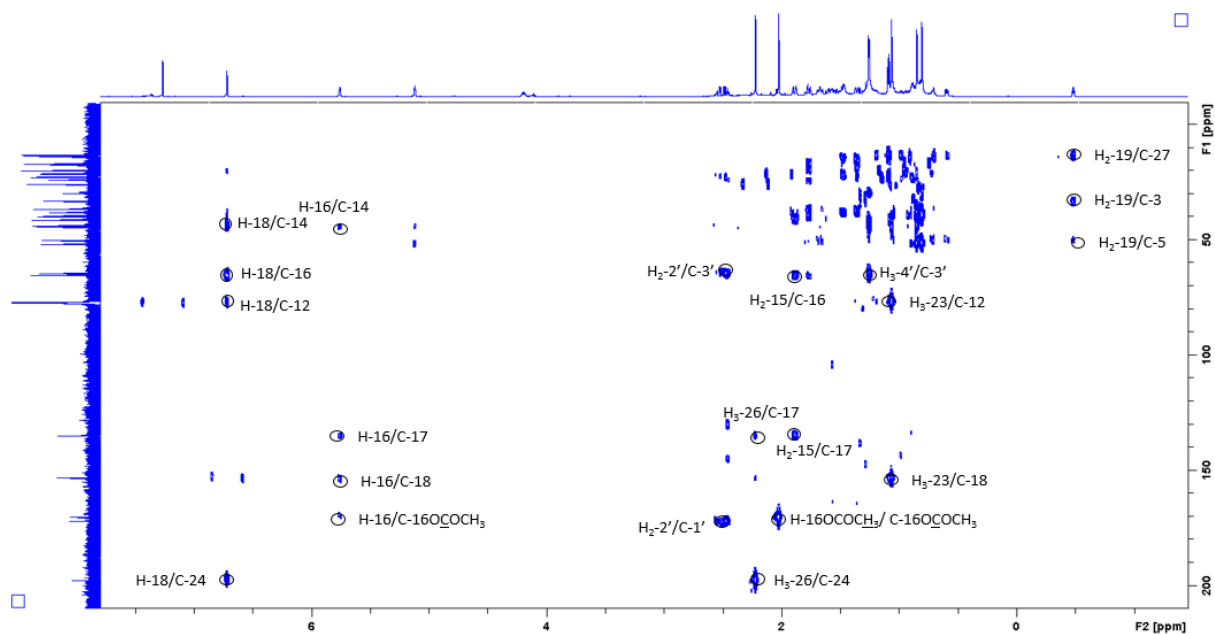

Figure S-33. HMBC spectrum of compound **5** (CDCl<sub>3</sub>, 600 MHz).

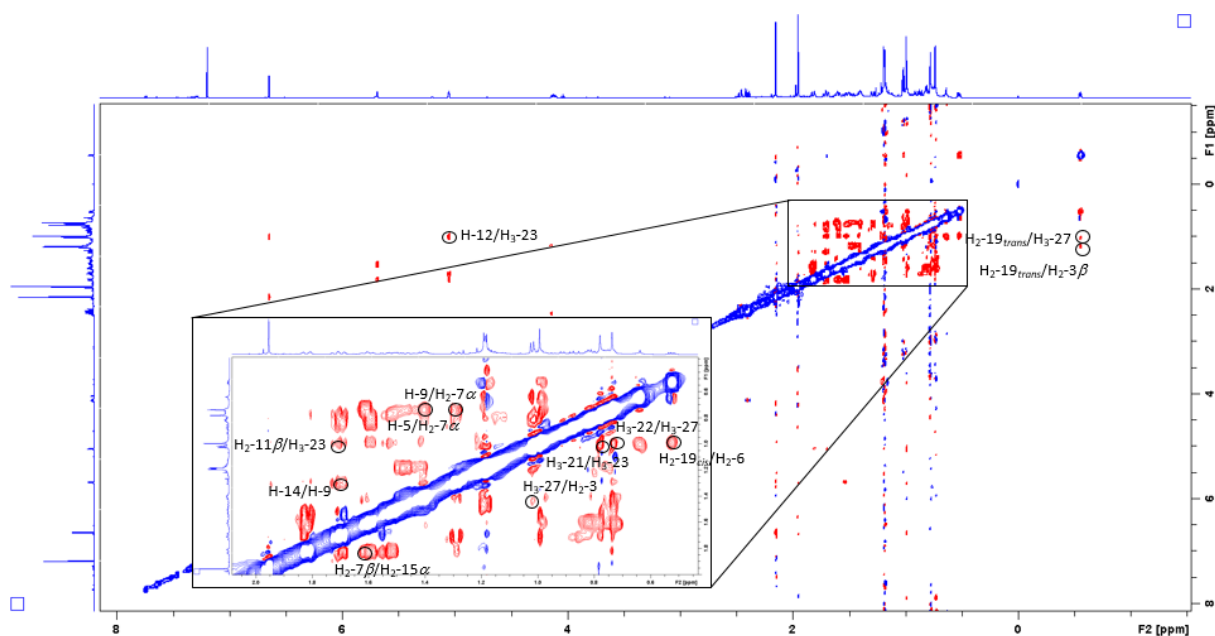

Figure S-34. NOESY spectrum of compound **5** (CDCl<sub>3</sub>, 600 MHz).

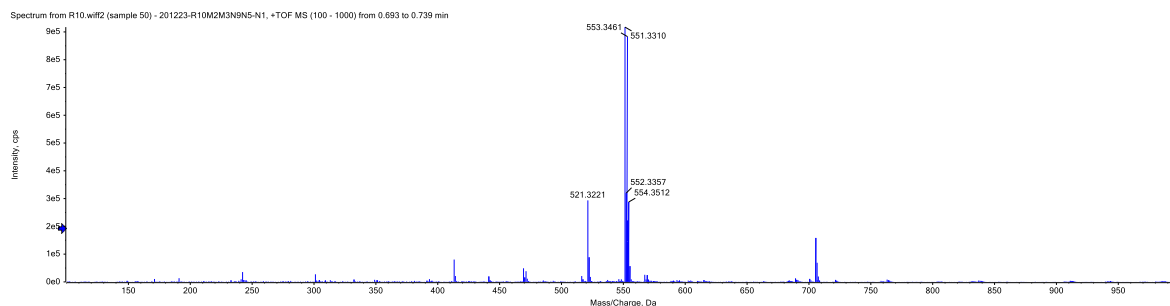

Figure S-35. HRMS spectrum of compound **5**.

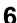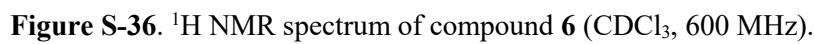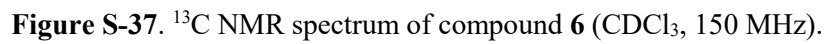

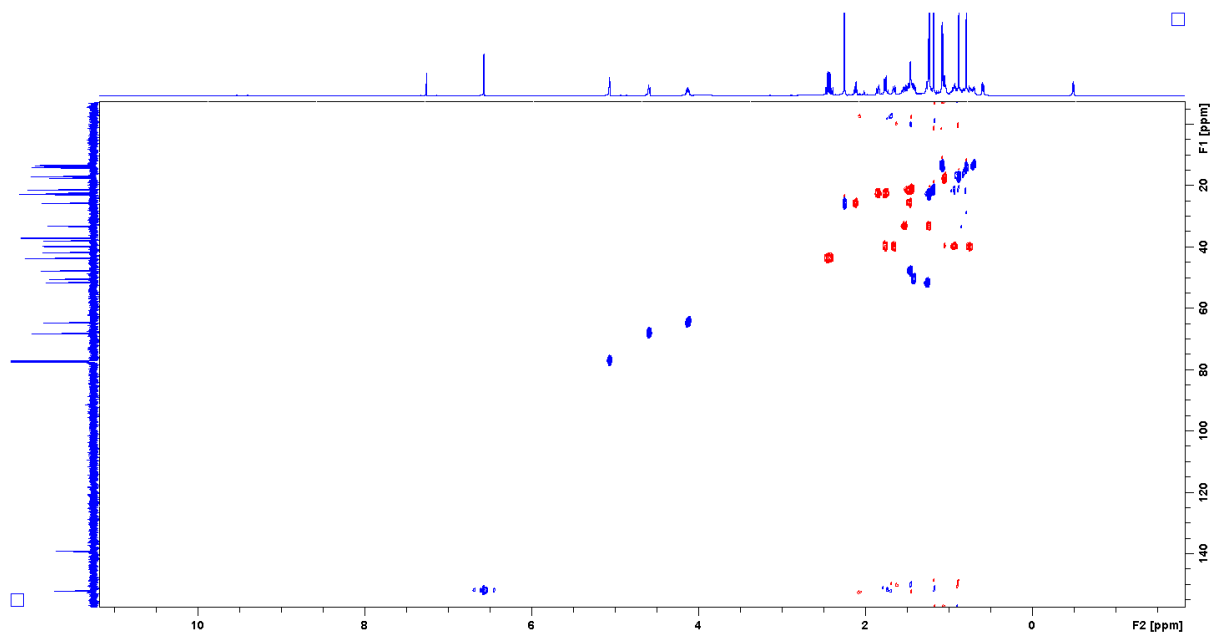

**Figure S-38.** HSQC spectrum of compound **6** (CDCl<sub>3</sub>, 600 MHz).

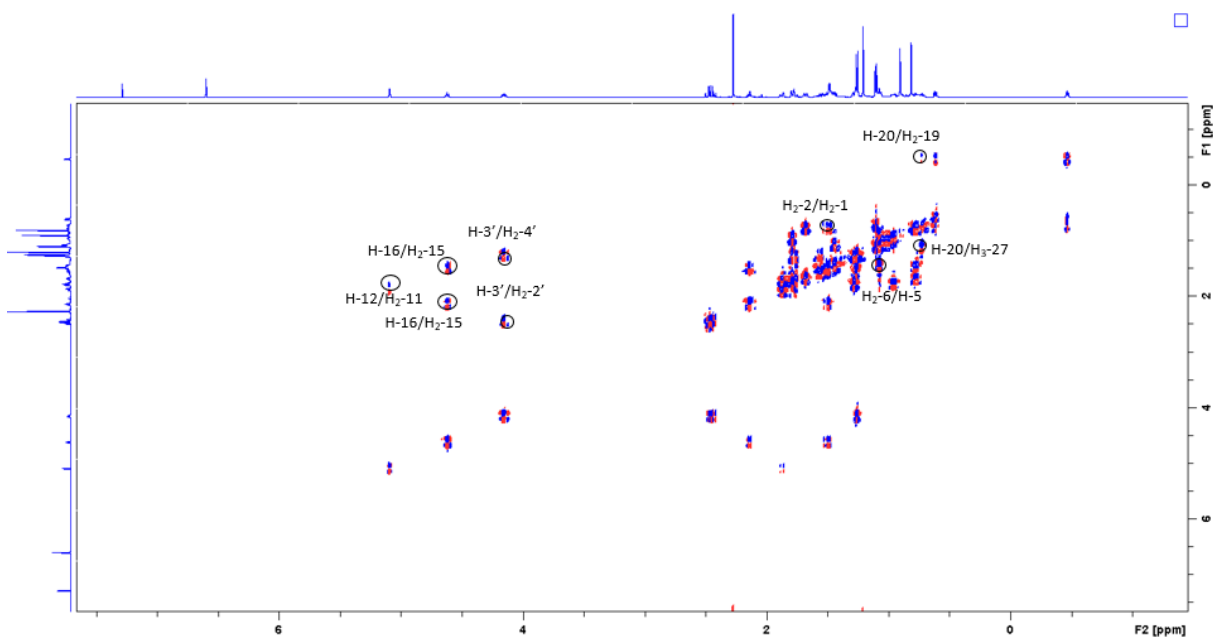

**Figure S-39.** <sup>1</sup>H-<sup>1</sup>H COSY spectrum of compound **6** (CDCl<sub>3</sub>, 600 MHz).

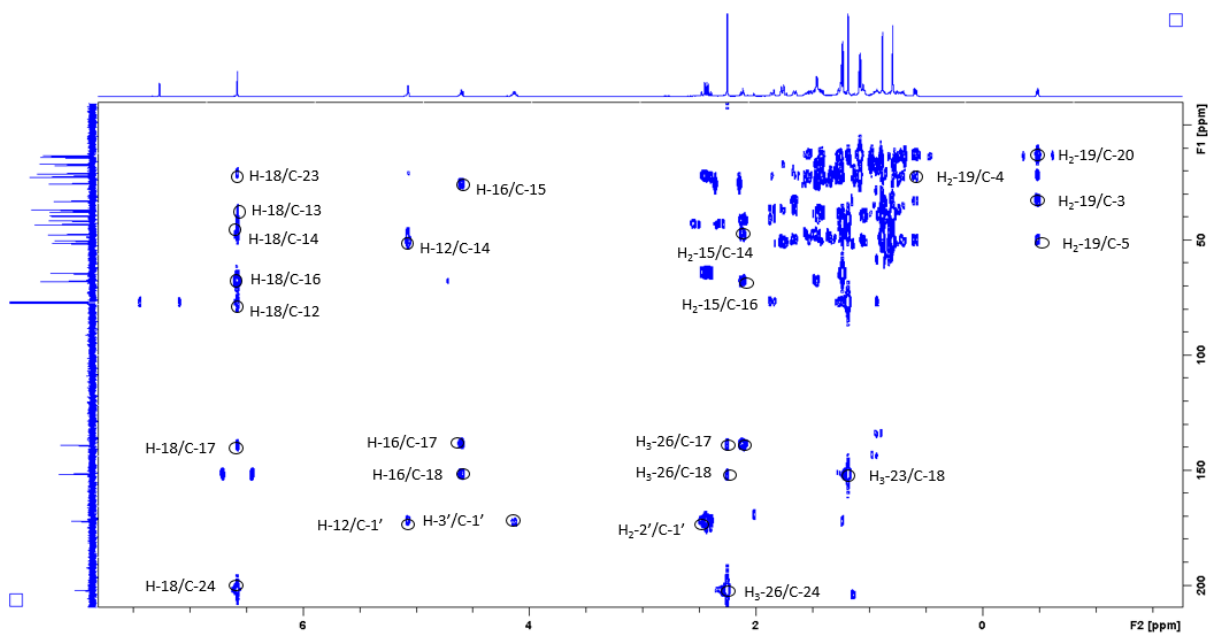

**Figure S-40.** HMBC spectrum of compound **6** (CDCl<sub>3</sub>, 600 MHz).

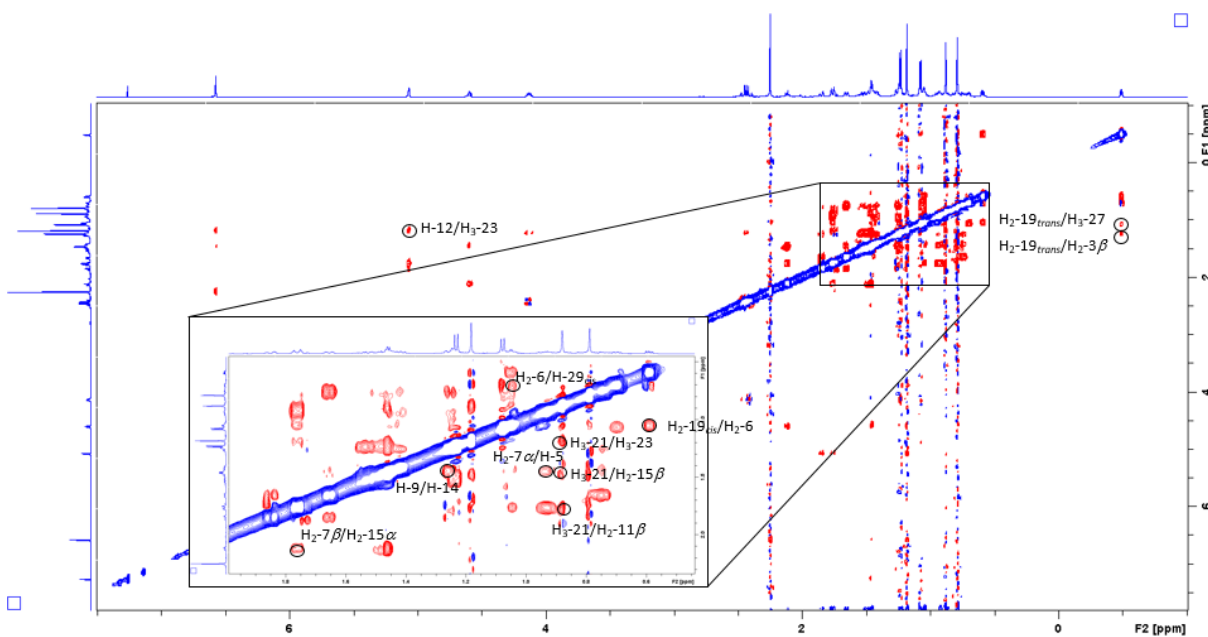

**Figure S-41.** NOESY spectrum of compound **6** (CDCl<sub>3</sub>, 600 MHz).

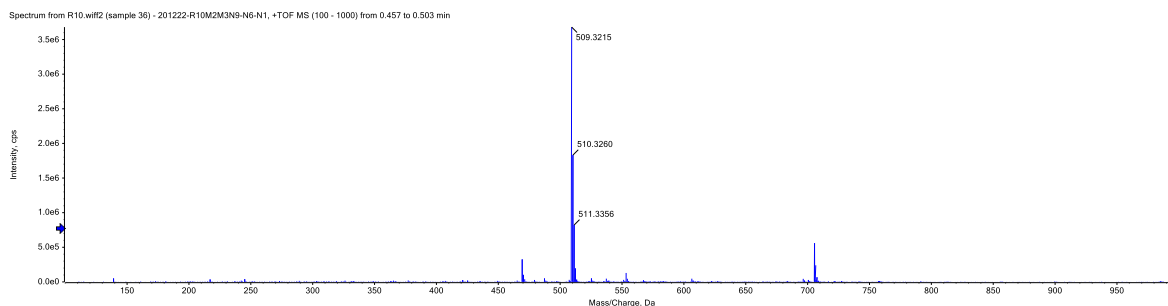

**Figure S-42.** HRMS spectrum of compound **6**.





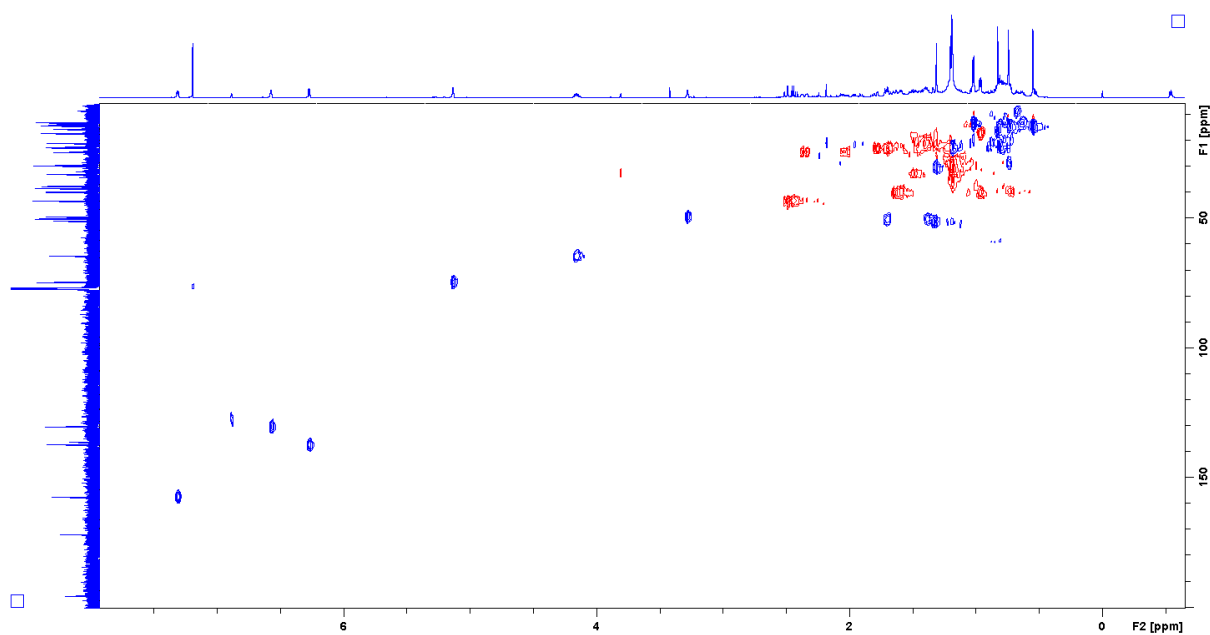

**Figure S-45.** HSQC spectrum of compound **7** (CDCl<sub>3</sub>, 600 MHz).

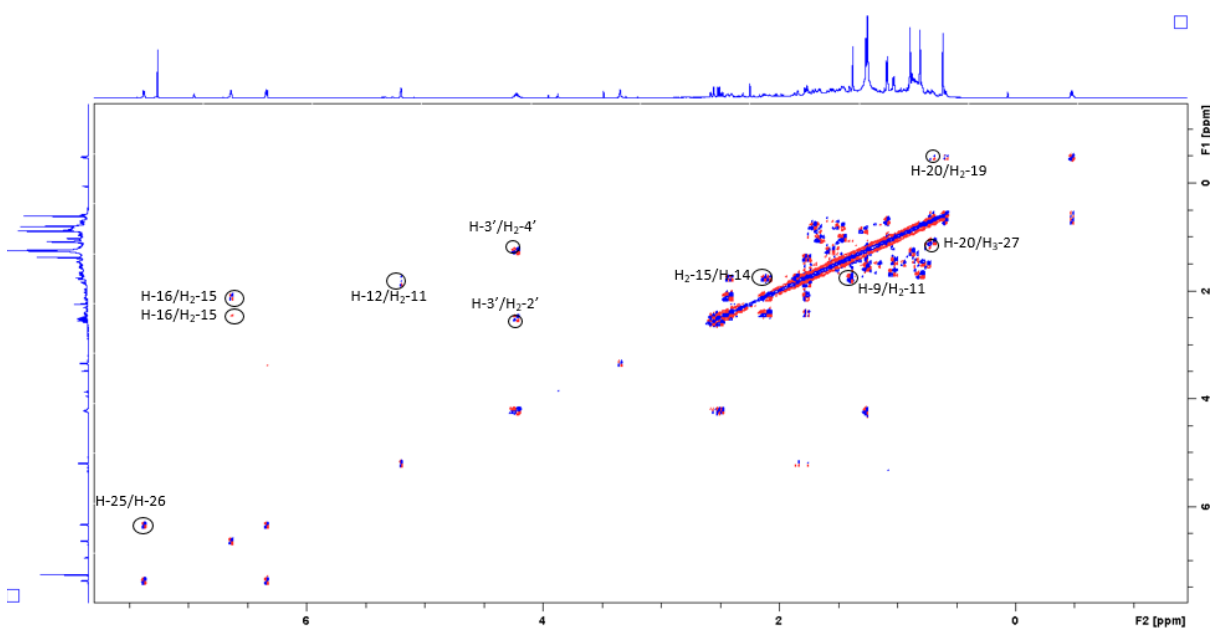

**Figure S-46.** <sup>1</sup>H-<sup>1</sup>H COSY spectrum of compound **7** (CDCl<sub>3</sub>, 600 MHz).

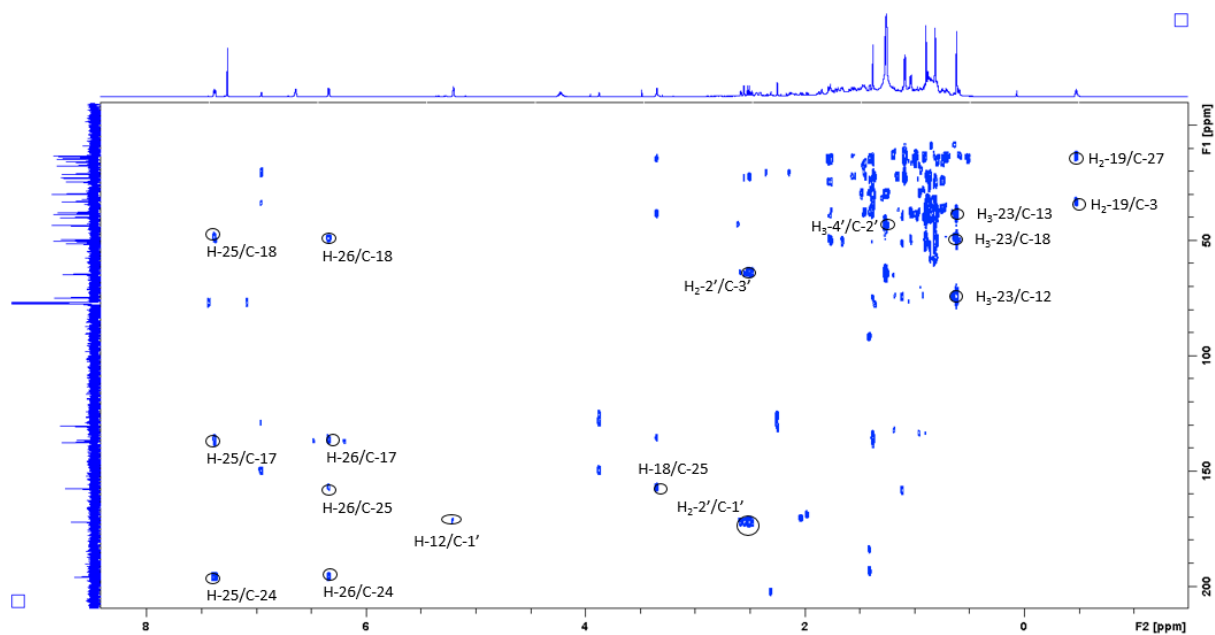

Figure S-47. HMBC spectrum of compound **7** (CDCl<sub>3</sub>, 600 MHz).

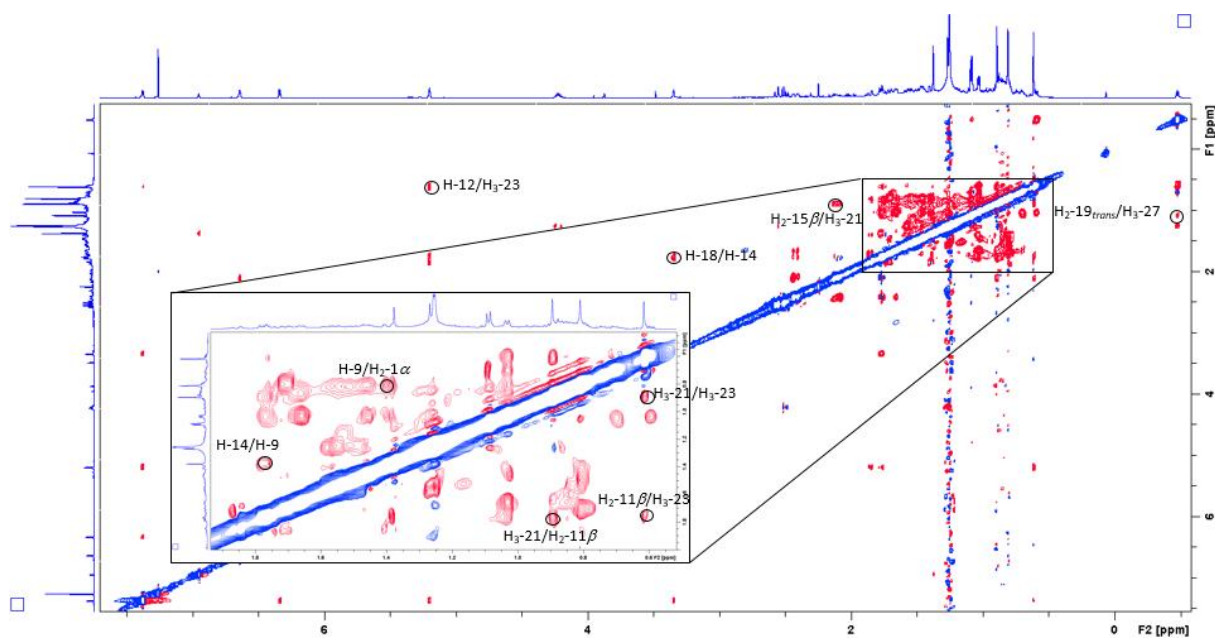

Figure S-48. NOESY spectrum of compound **7** (CDCl<sub>3</sub>, 600 MHz).

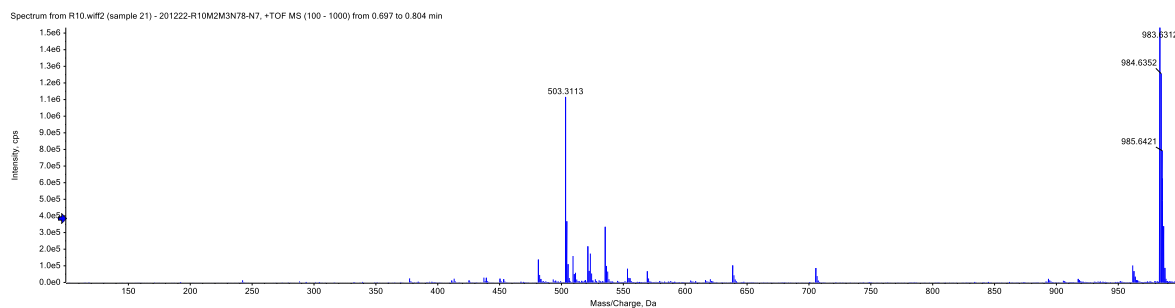

Figure S-49. HRMS spectrum of compound **7**.

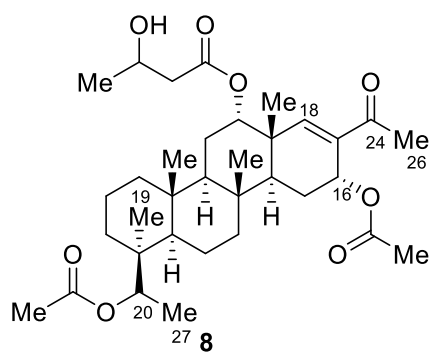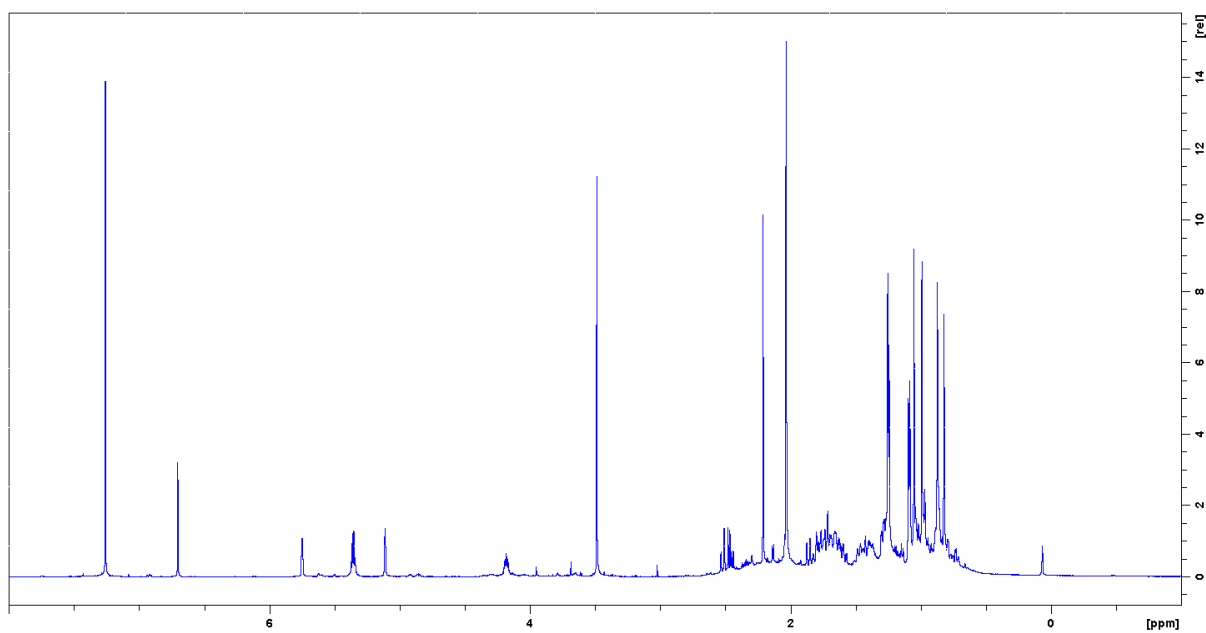

Figure S-50.  $^1\text{H}$  NMR spectrum of compound **8** ( $\text{CDCl}_3$ , 600 MHz).

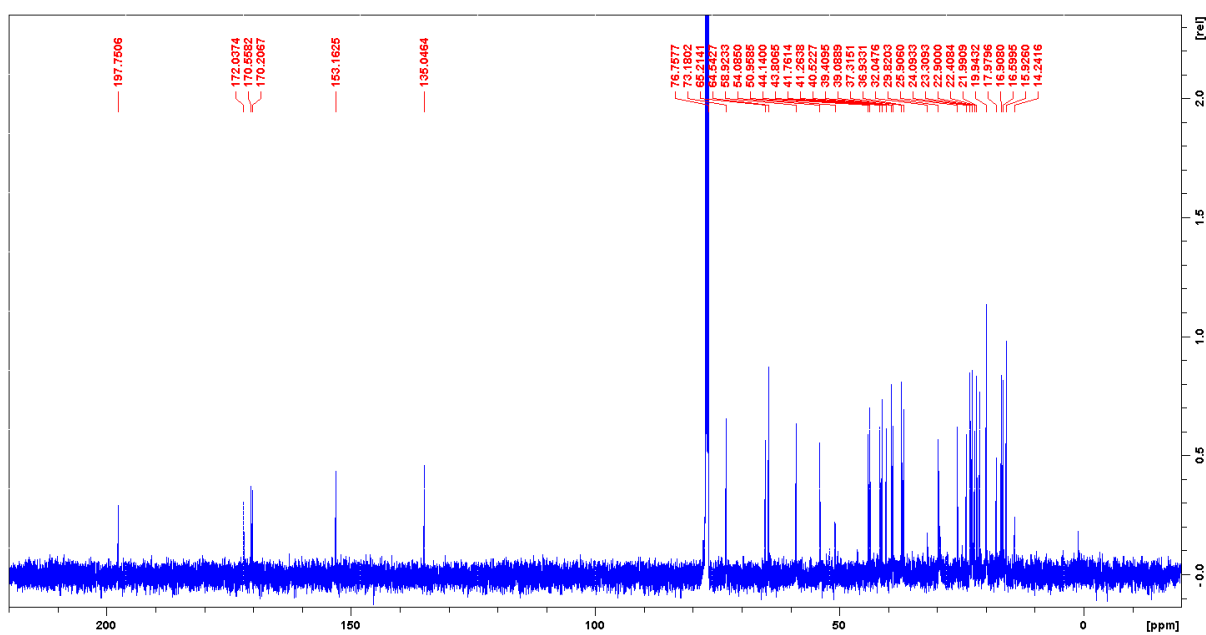

Figure S-51.  $^{13}\text{C}$  NMR spectrum of compound **8** ( $\text{CDCl}_3$ , 150 MHz).

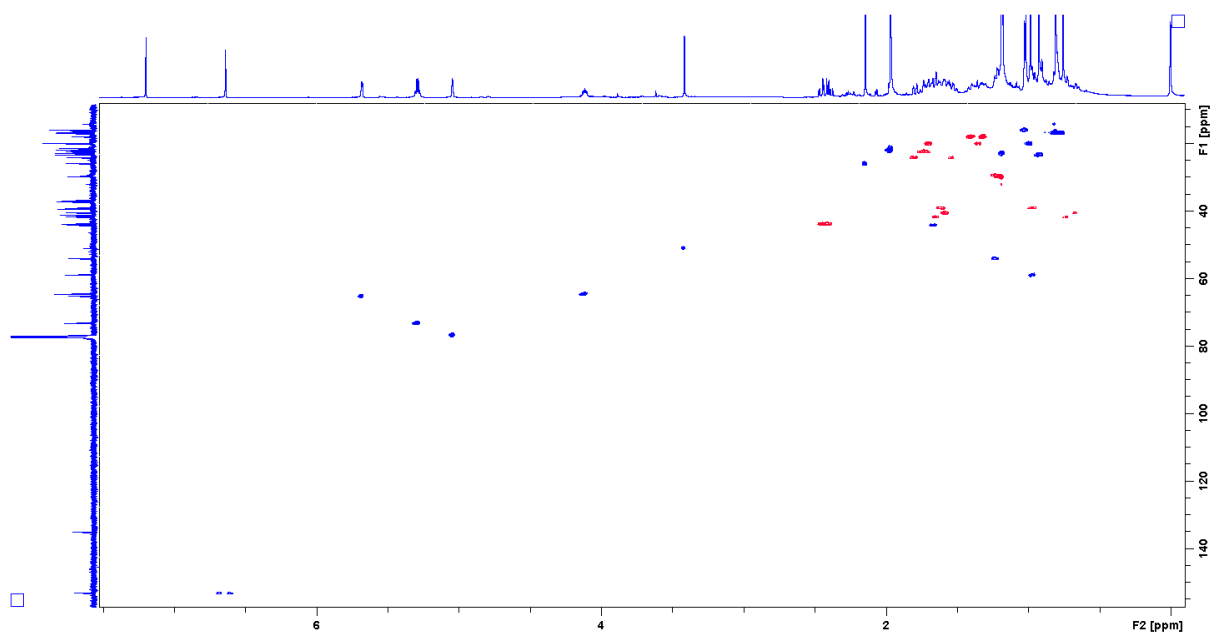

**Figure S-52.** HSQC spectrum of compound **8** (CDCl<sub>3</sub>, 600 MHz).

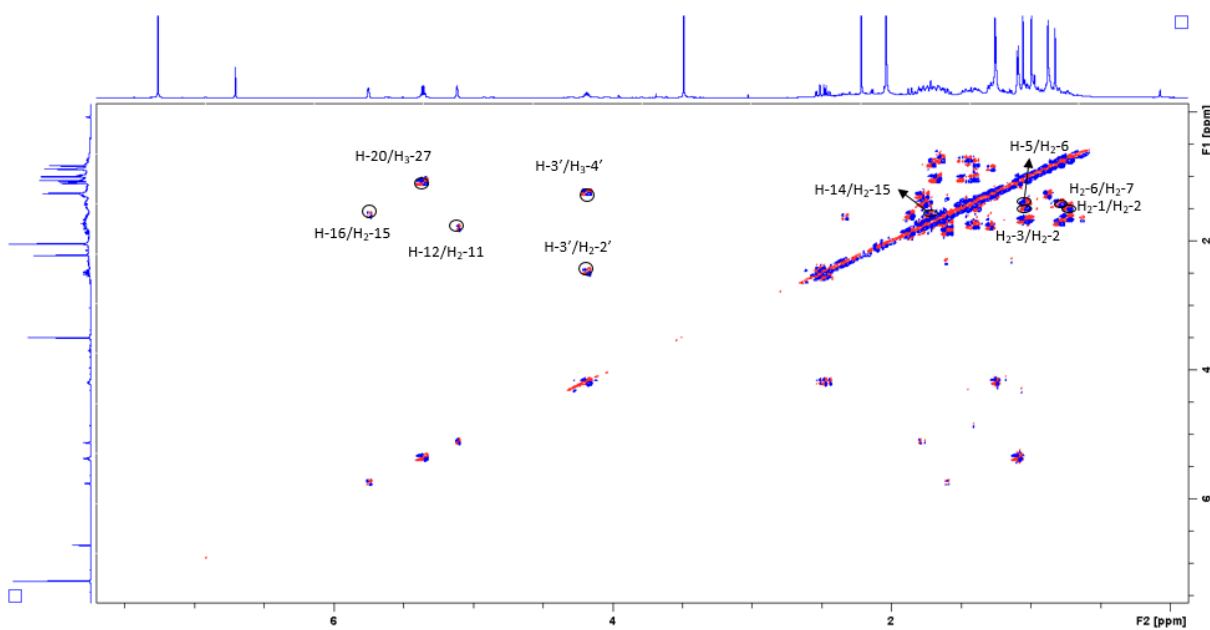

**Figure S-53.** <sup>1</sup>H-<sup>1</sup>H COSY spectrum of compound **8** (CDCl<sub>3</sub>, 600 MHz).

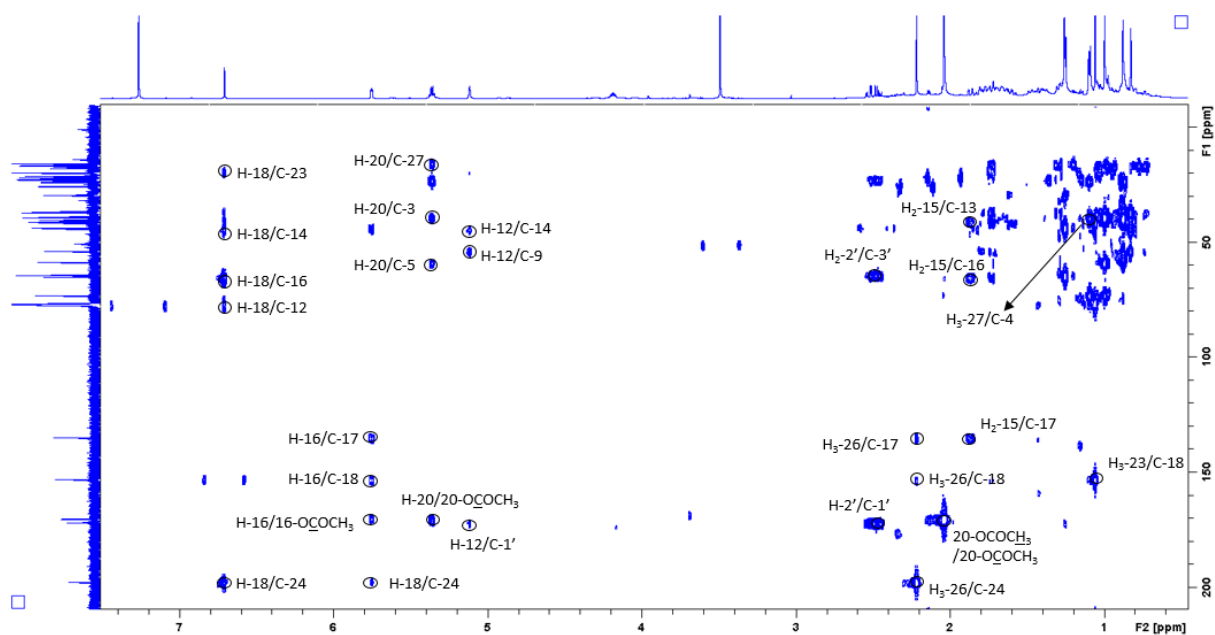

**Figure S-54.** HMBC spectrum of compound **8** (CDCl<sub>3</sub>, 600 MHz).

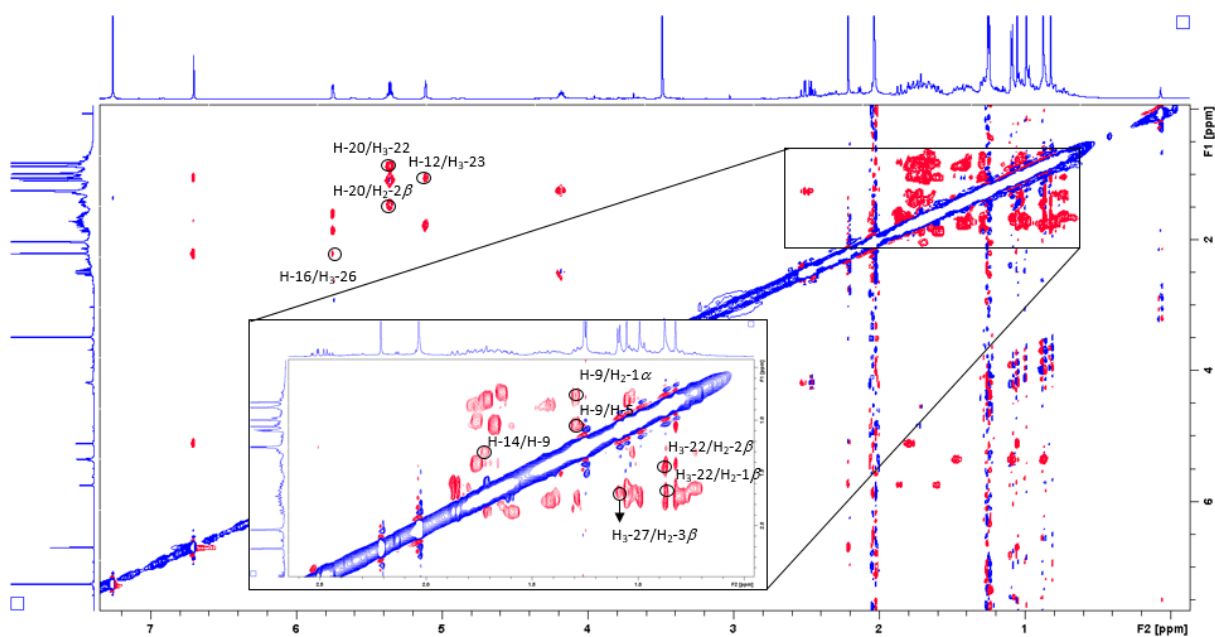

**Figure S-55.** NOESY spectrum of compound **8** (CDCl<sub>3</sub>, 600 MHz).

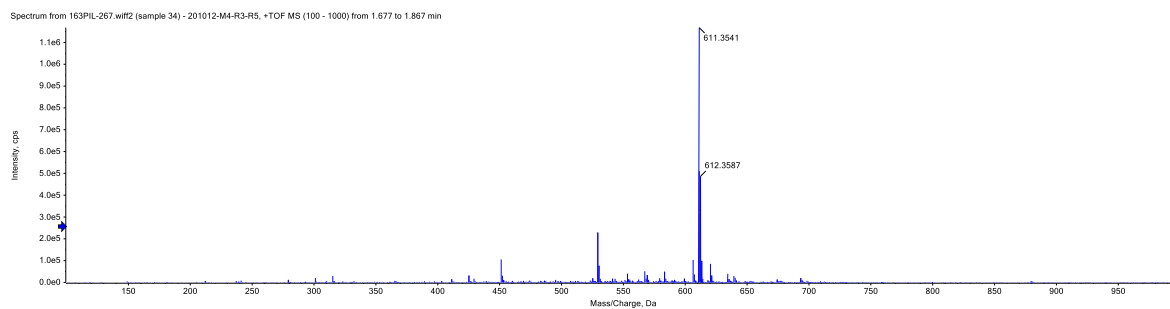

**Figure S-56.** HRMS of compound **8**.

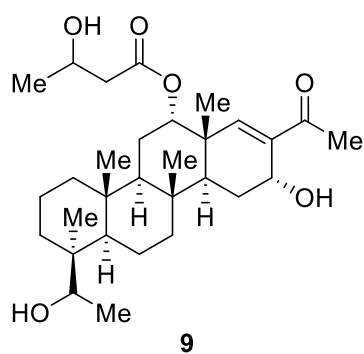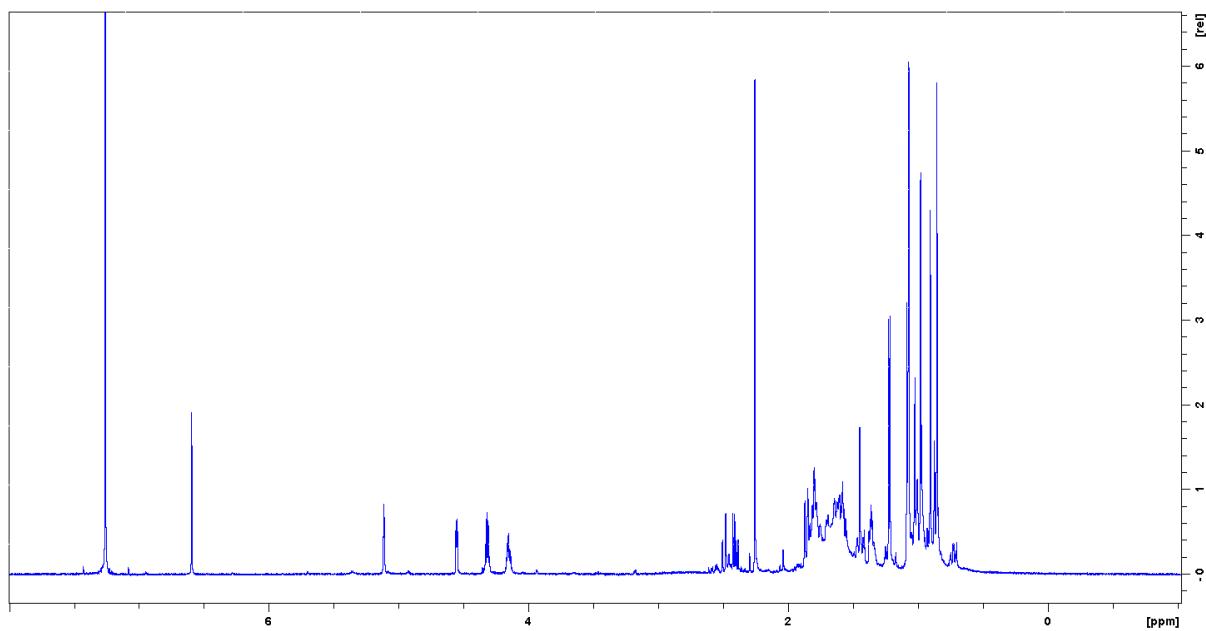

Figure S-57. <sup>1</sup>H NMR spectrum of compound **9** (CDCl<sub>3</sub>, 600 MHz).

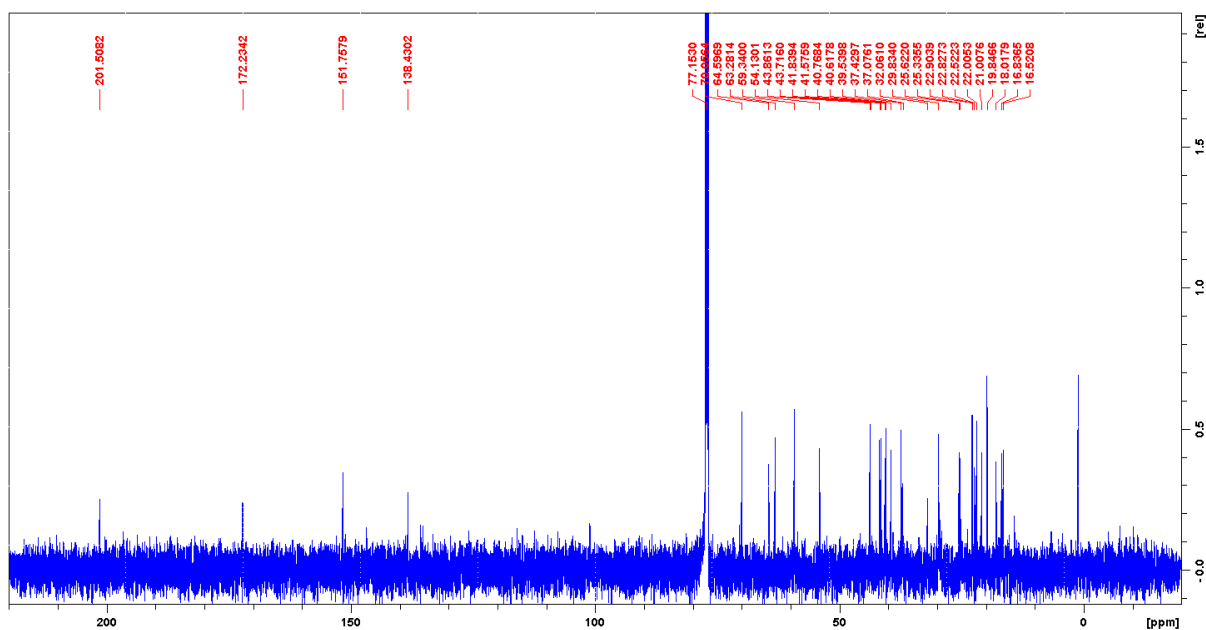

Figure S-58. <sup>13</sup>C NMR spectrum of compound **9** (CDCl<sub>3</sub>, 150 MHz).

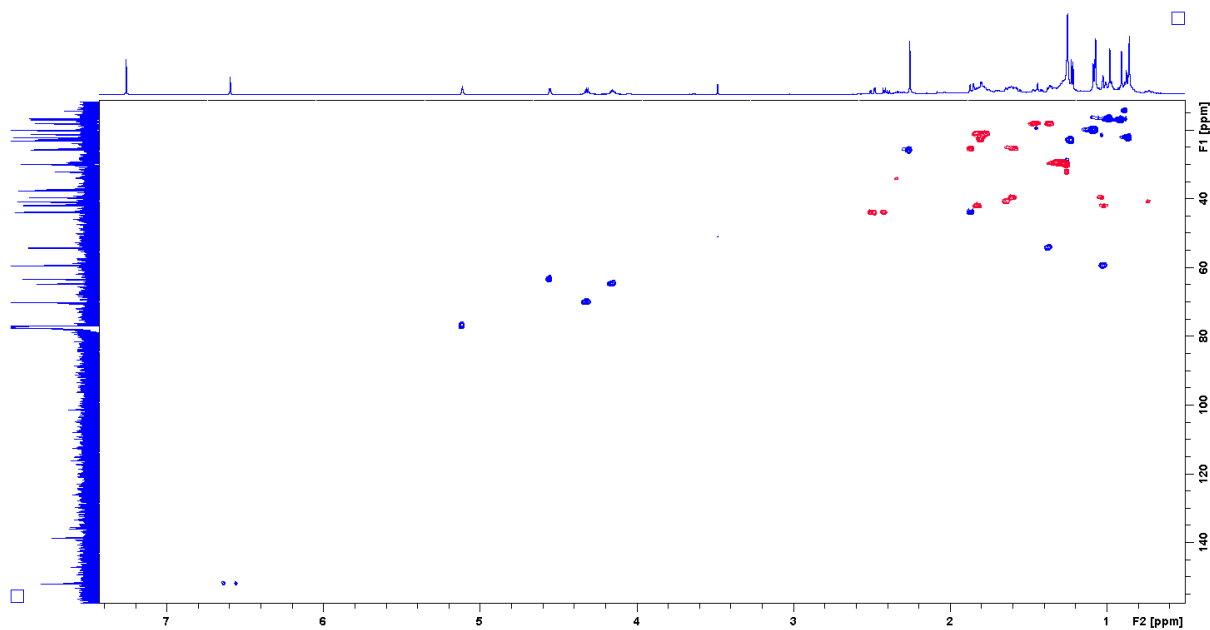

**Figure S-59.** HSQC spectrum of compound **9** (CDCl<sub>3</sub>, 600 MHz).

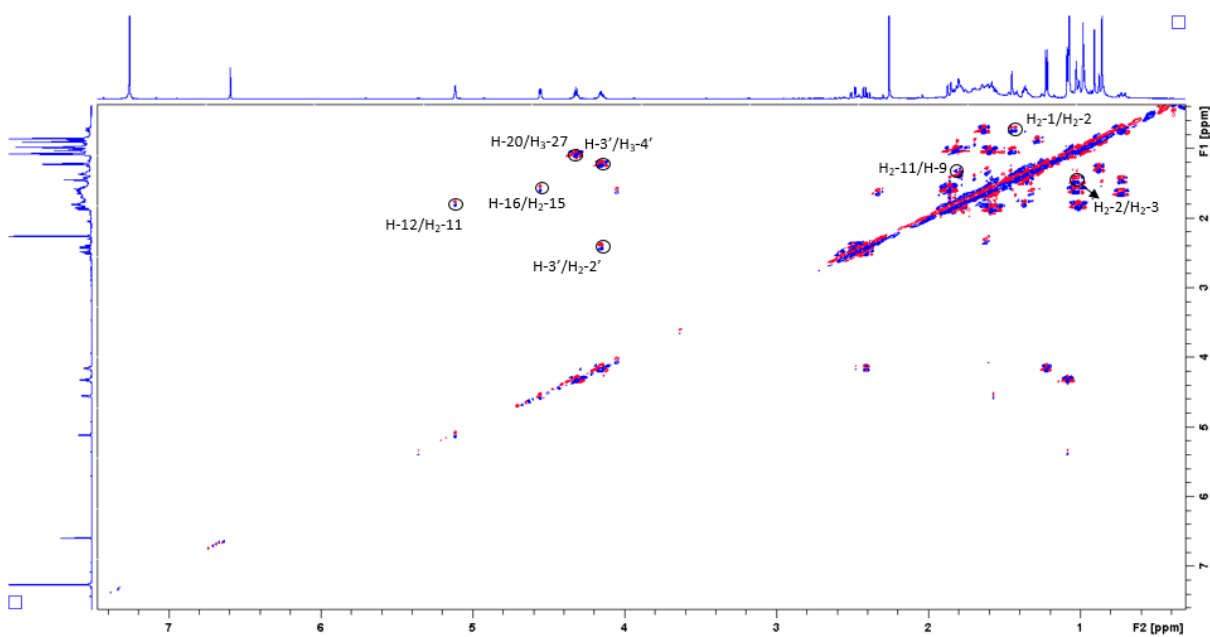

**Figure S-60.** <sup>1</sup>H-<sup>1</sup>H COSY spectrum of compound **9** (CDCl<sub>3</sub>, 600 MHz).

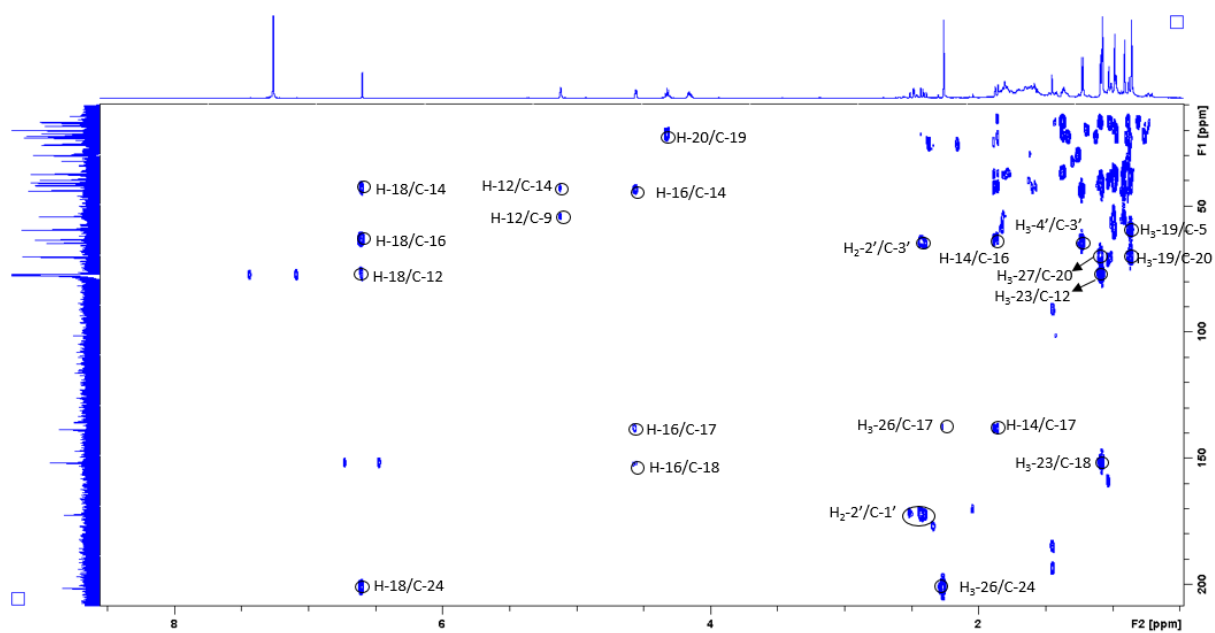

Figure S-61. HMBC spectrum of compound **9** (CDCl<sub>3</sub>, 600 MHz).

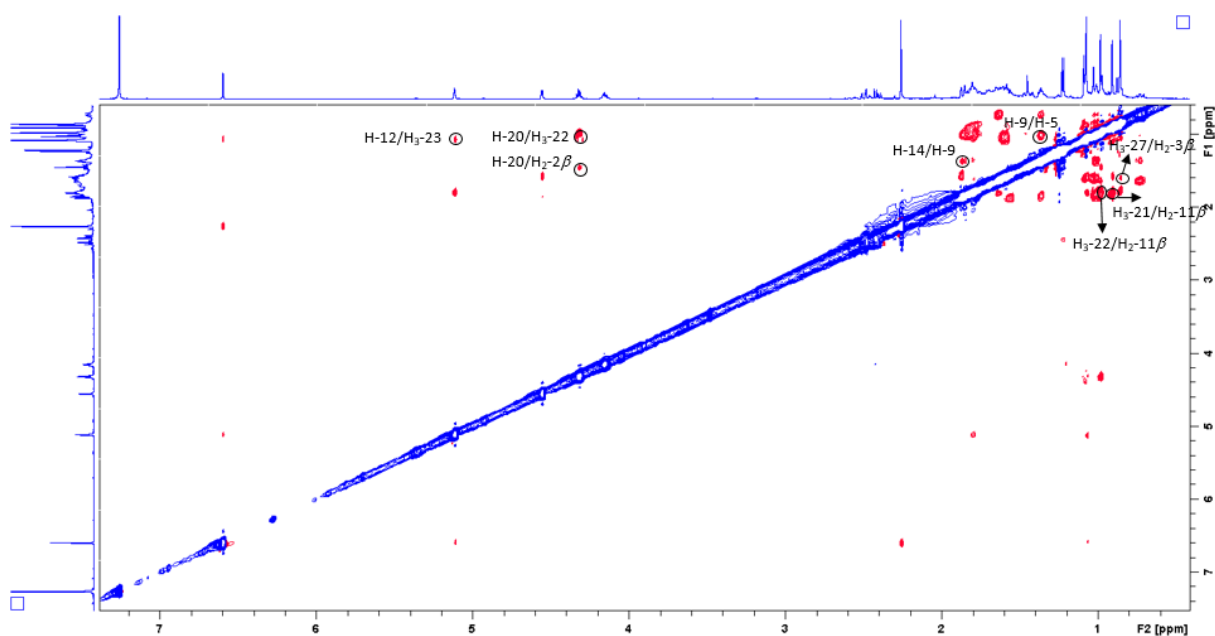

Figure S-62. NOESY spectrum of compound **9** (CDCl<sub>3</sub>, 600 MHz).

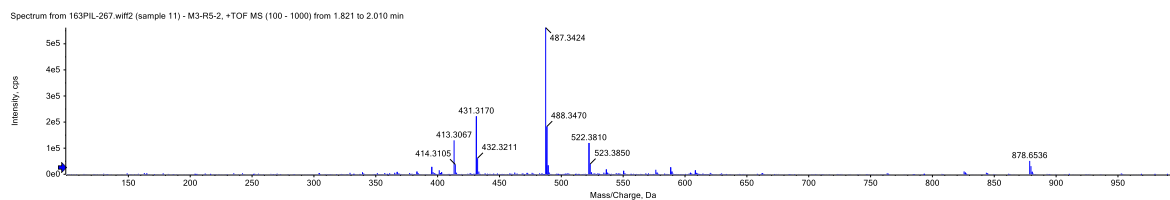

Figure S-63. HRMS spectrum of compound **9**.



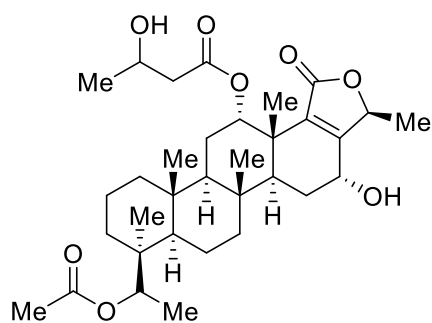

**10**

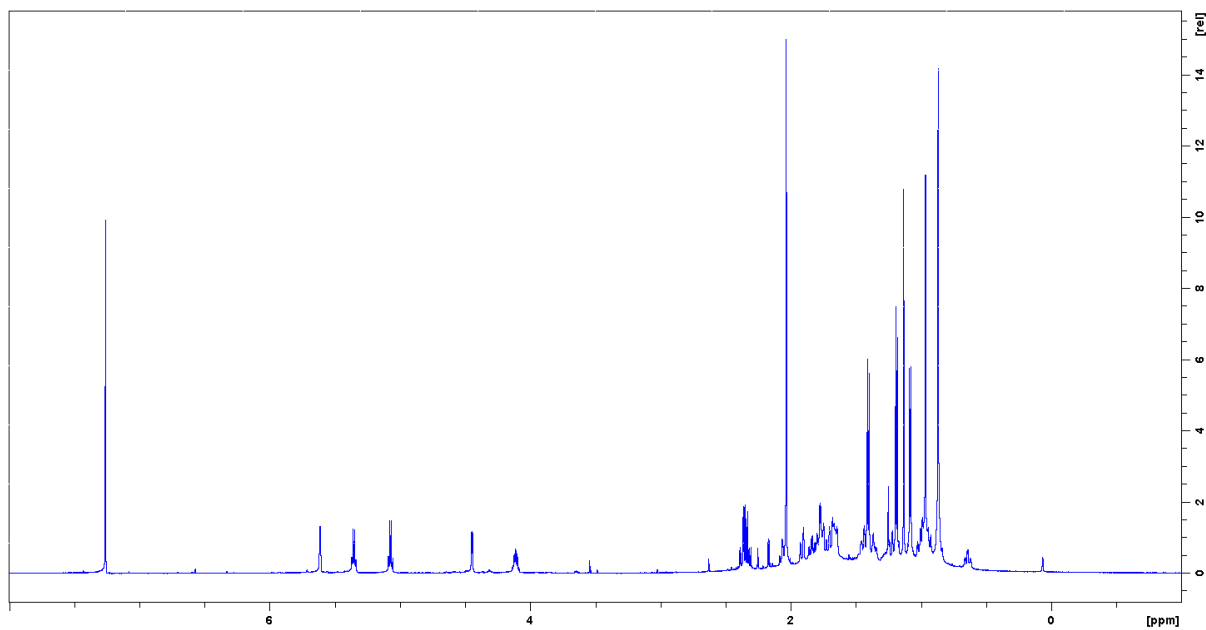

**Figure S-64.**  $^1\text{H}$  NMR spectrum of compound **10** ( $\text{CDCl}_3$ , 600 MHz).

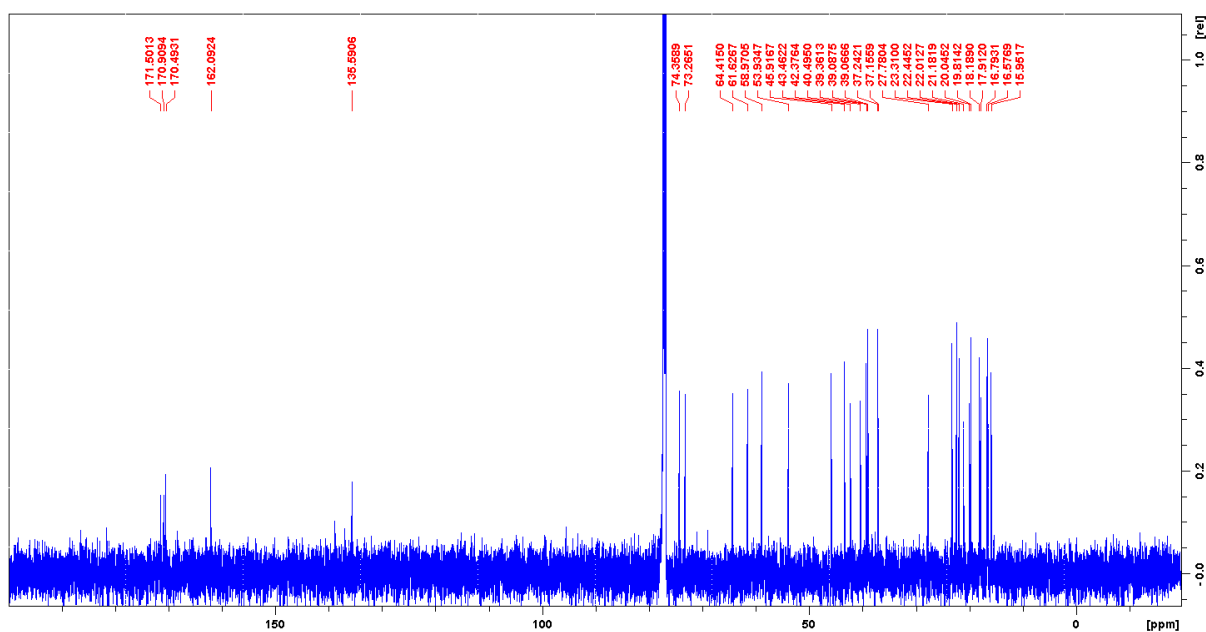

**Figure S-65.**  $^{13}\text{C}$  NMR spectrum of compound **10** ( $\text{CDCl}_3$ , 150 MHz).

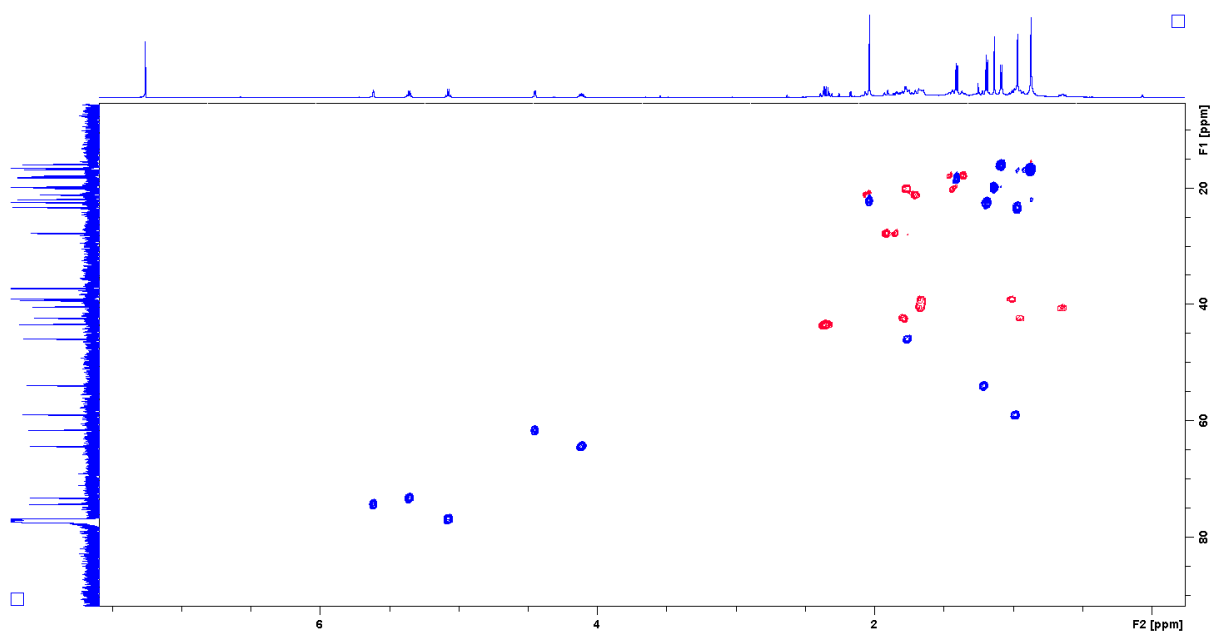

**Figure S-66.** HSQC spectrum of compound **10** (CDCl<sub>3</sub>, 600 MHz).

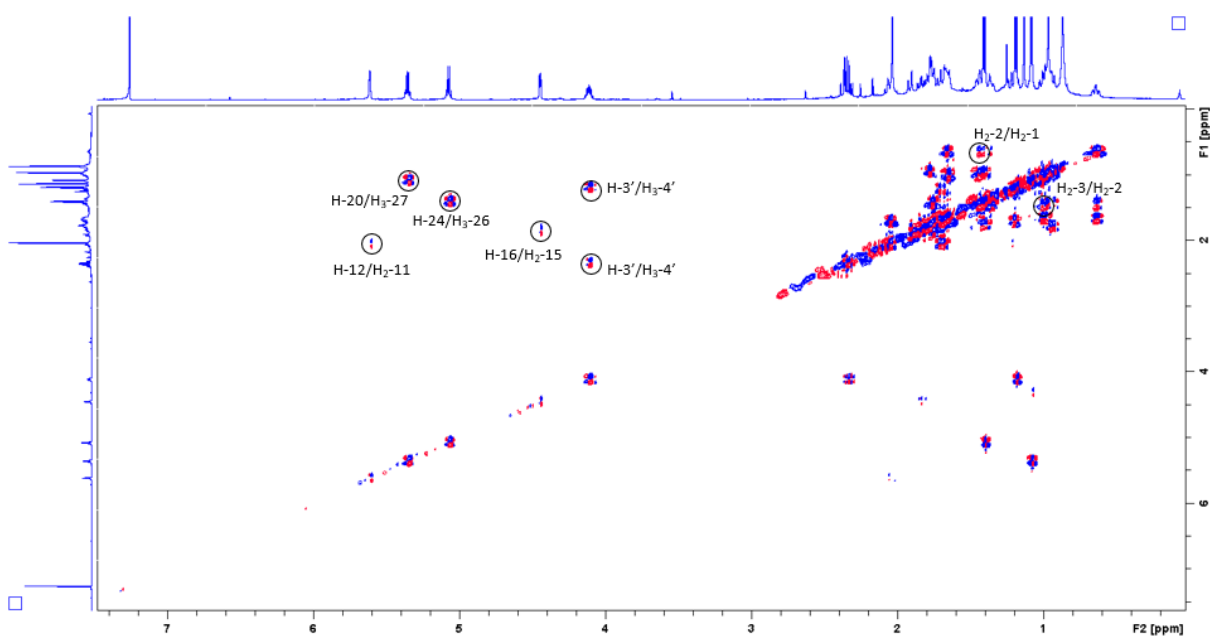

**Figure S-67.** <sup>1</sup>H-<sup>1</sup>H COSY spectrum of compound **10** (CDCl<sub>3</sub>, 600 MHz).

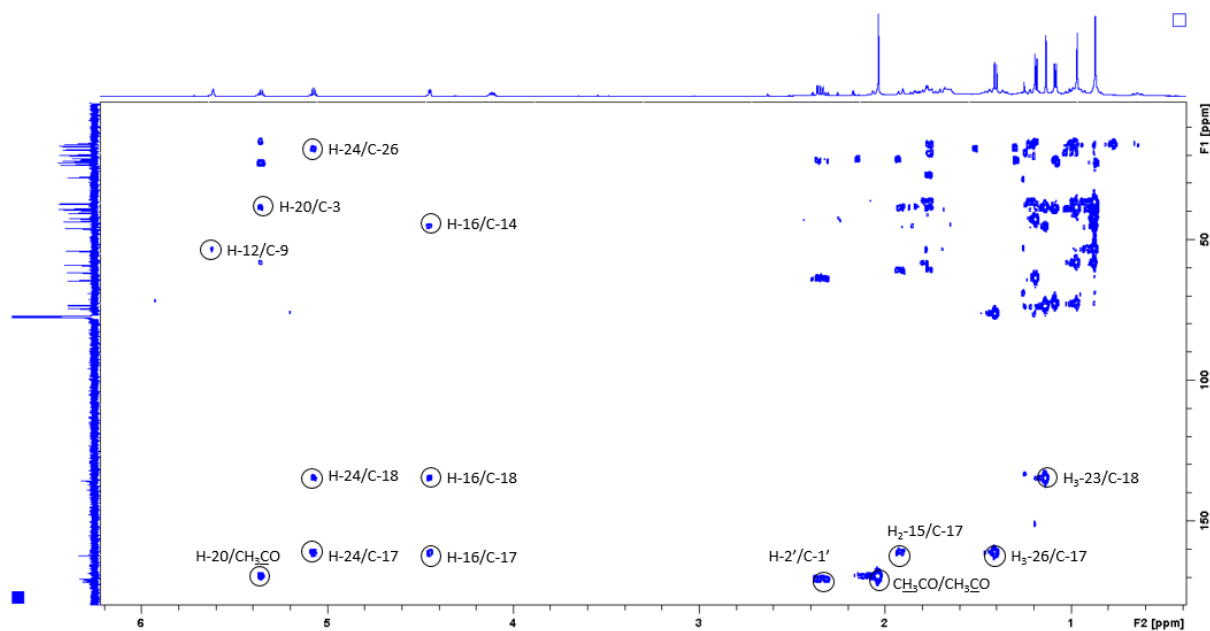

**Figure S-68.** HMBC spectrum of compound **10** (CDCl<sub>3</sub>, 600 MHz).

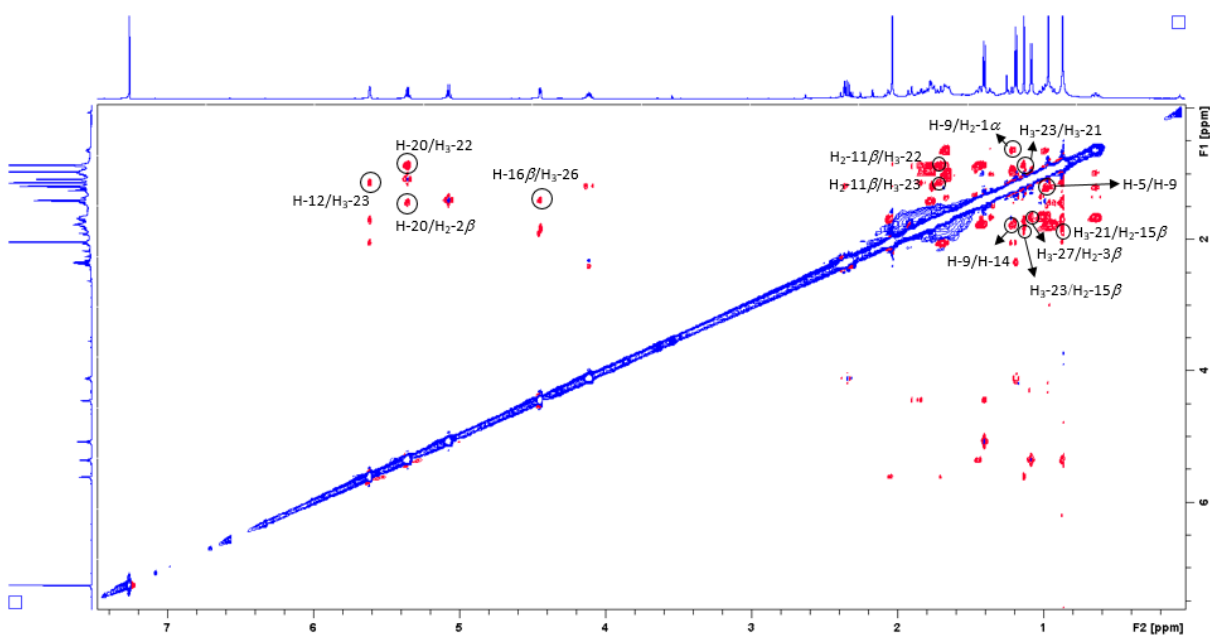

**Figure S-69.** NOESY spectrum of compound **10** (CDCl<sub>3</sub>, 600 MHz).

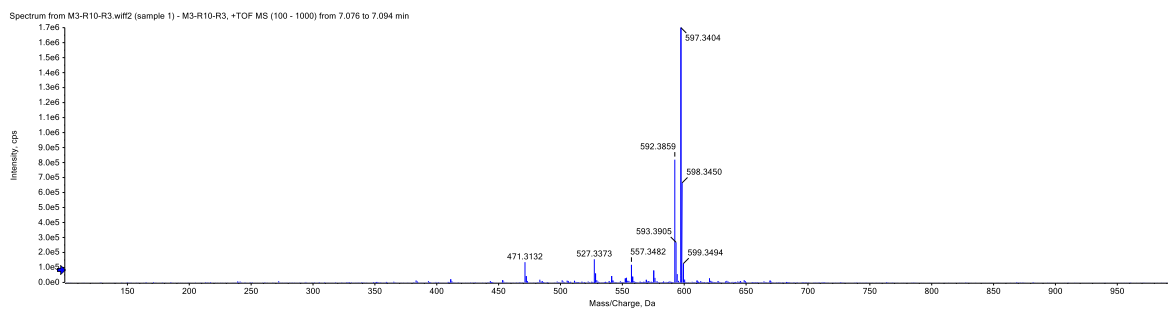

**Figure S-70.** HRMS spectrum of compound **10**.

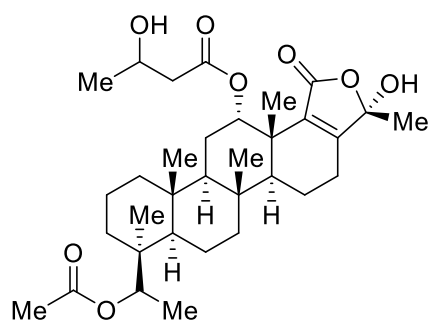

**11**

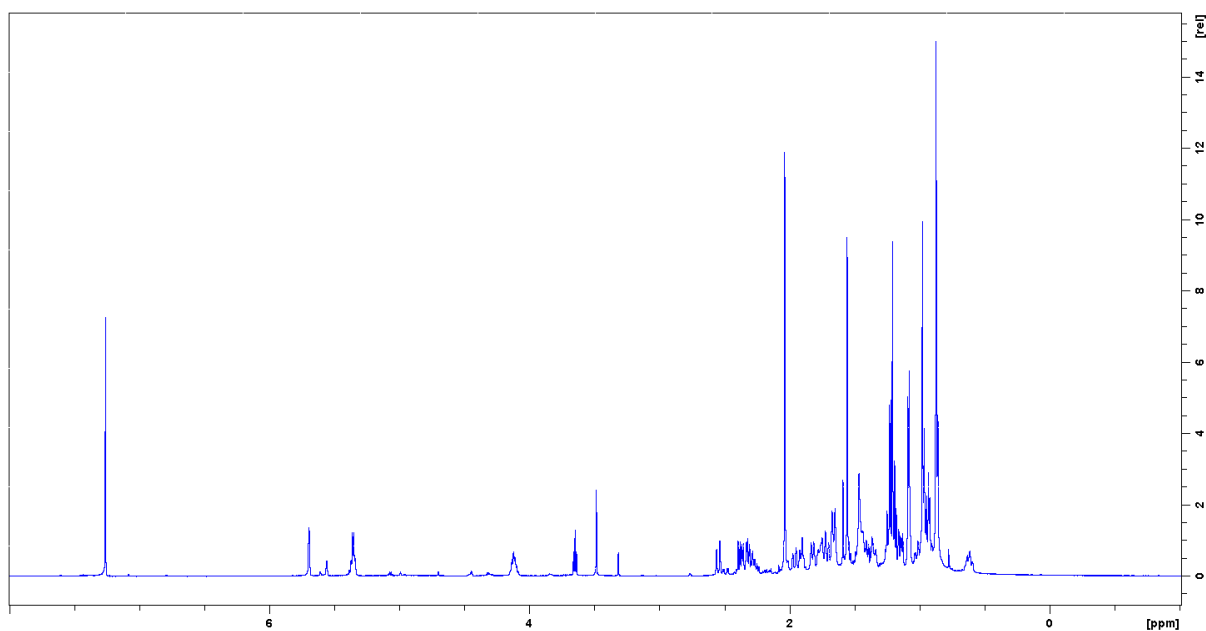

**Figure S-71.** <sup>1</sup>H NMR spectrum of compound 11 (CDCl<sub>3</sub>, 600 MHz).

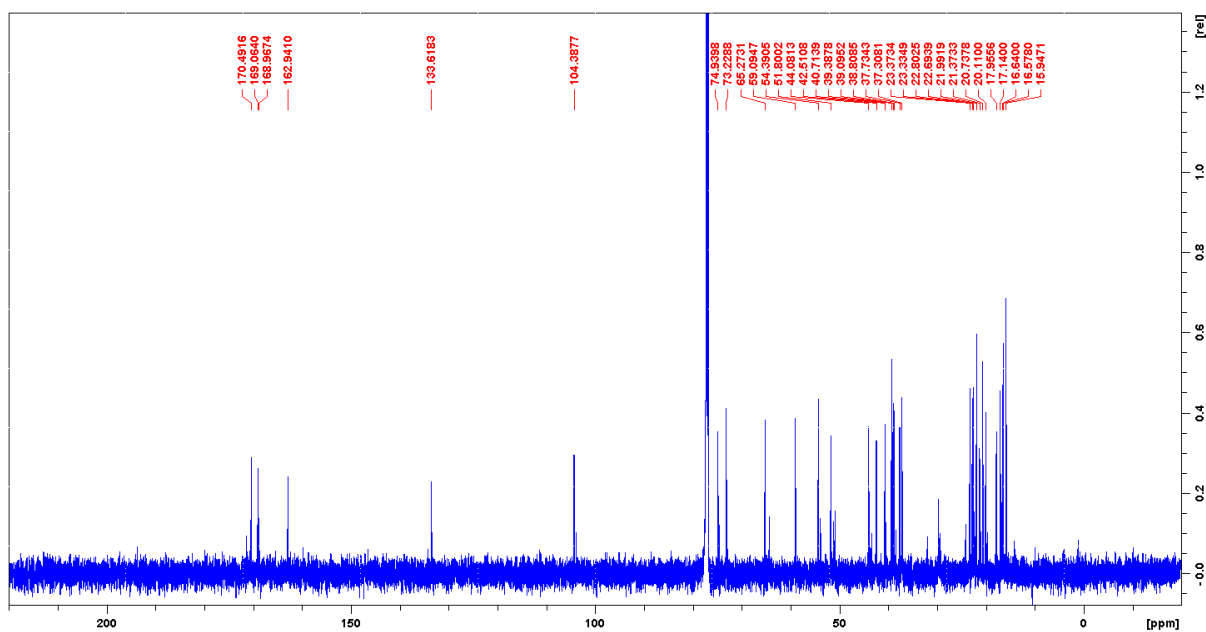

**Figure S-72.** <sup>13</sup>C NMR spectrum of compound 11 (CDCl<sub>3</sub>, 150 MHz).

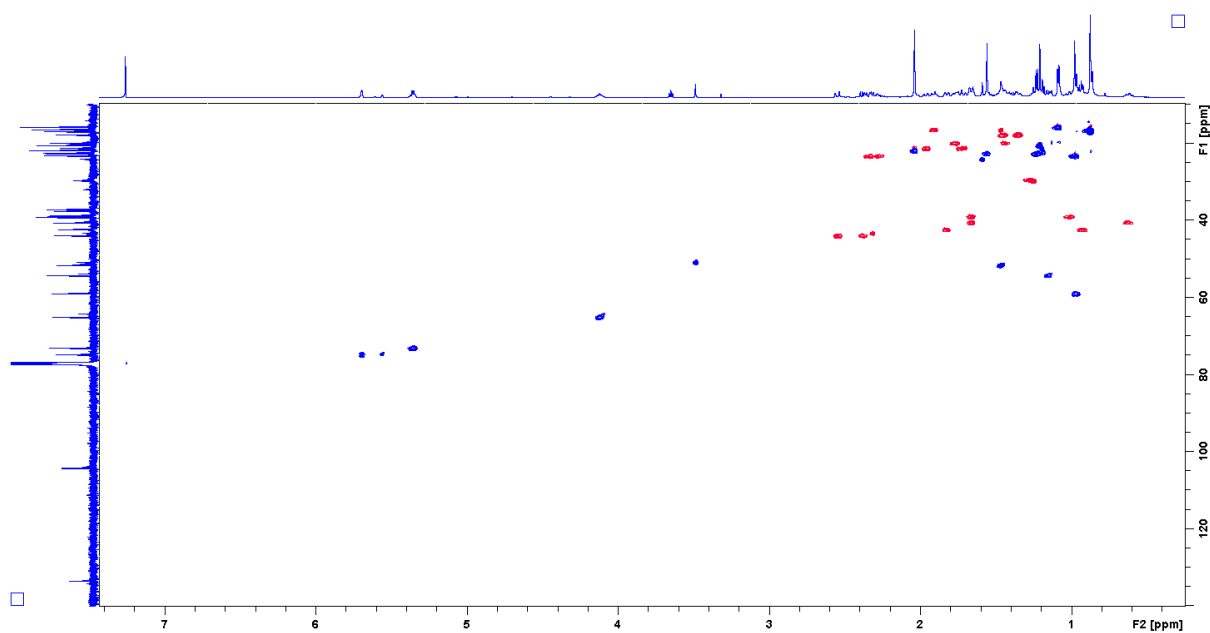

**Figure S-73.** HSQC spectrum of compound **11** (CDCl<sub>3</sub>, 600 MHz).

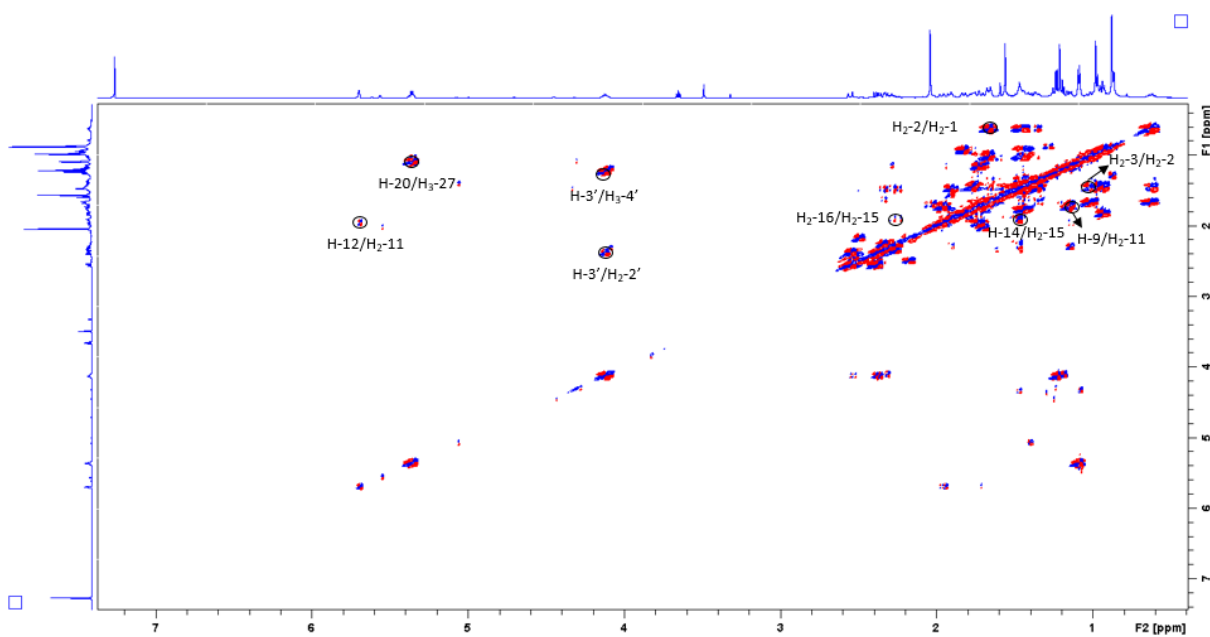

**Figure S-74.** <sup>1</sup>H-<sup>1</sup>H COSY spectrum of compound **11** (CDCl<sub>3</sub>, 600 MHz).

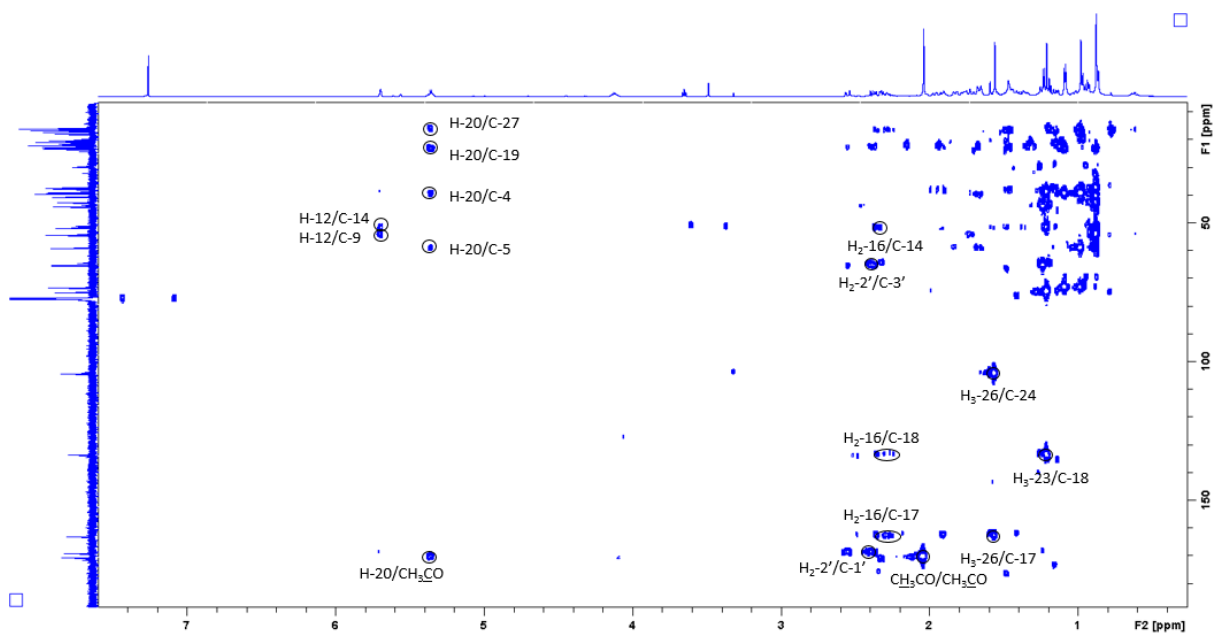

**Figure S-75.** HMBC spectrum of compound **11** (CDCl<sub>3</sub>, 600 MHz).

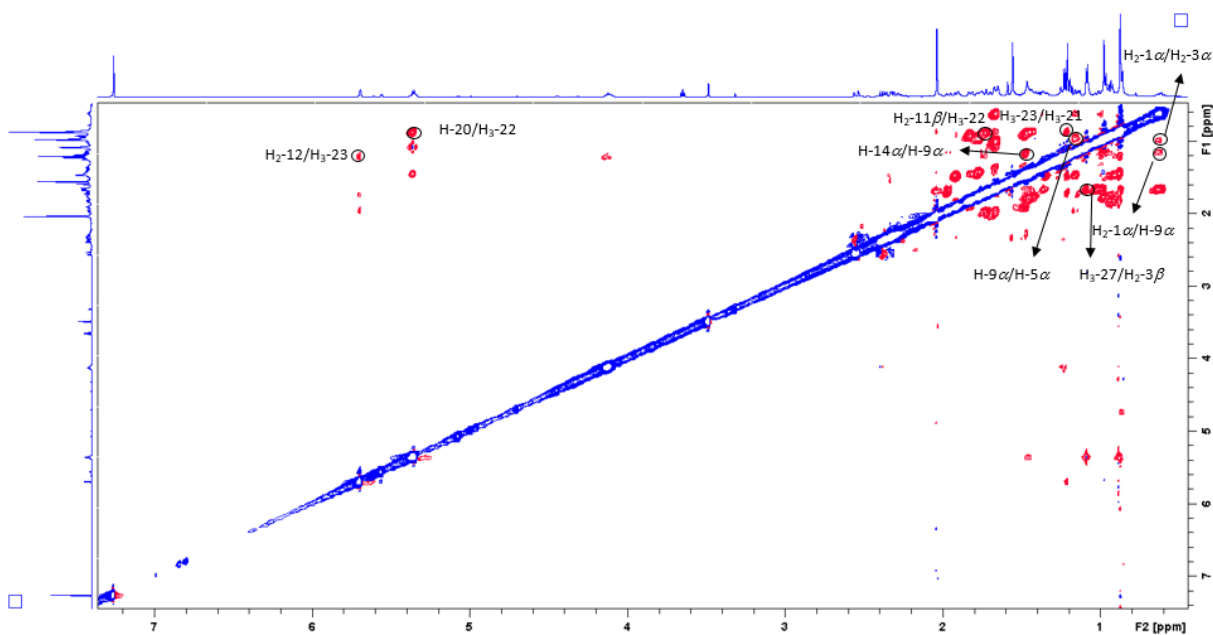

**Figure S-76.** NOESY spectrum of compound **11** (CDCl<sub>3</sub>, 600 MHz).

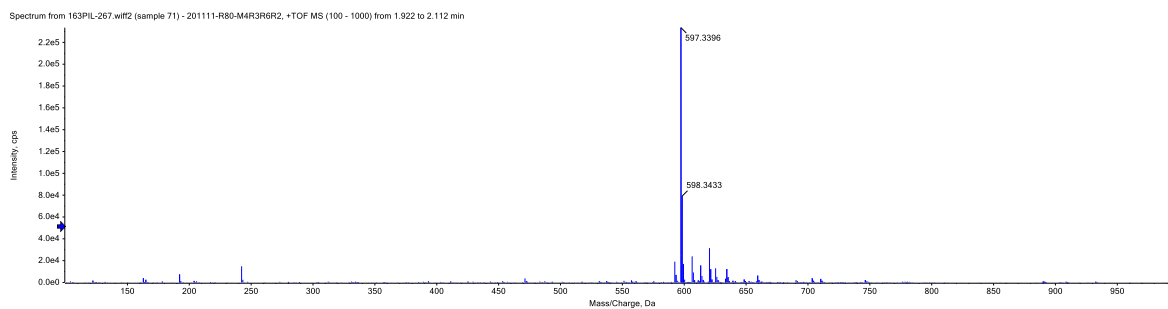

**Figure S-77.** HRMS spectrum of compound **11**.

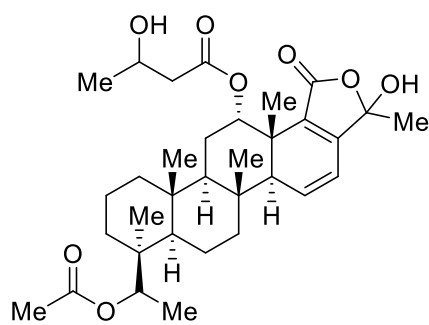

12

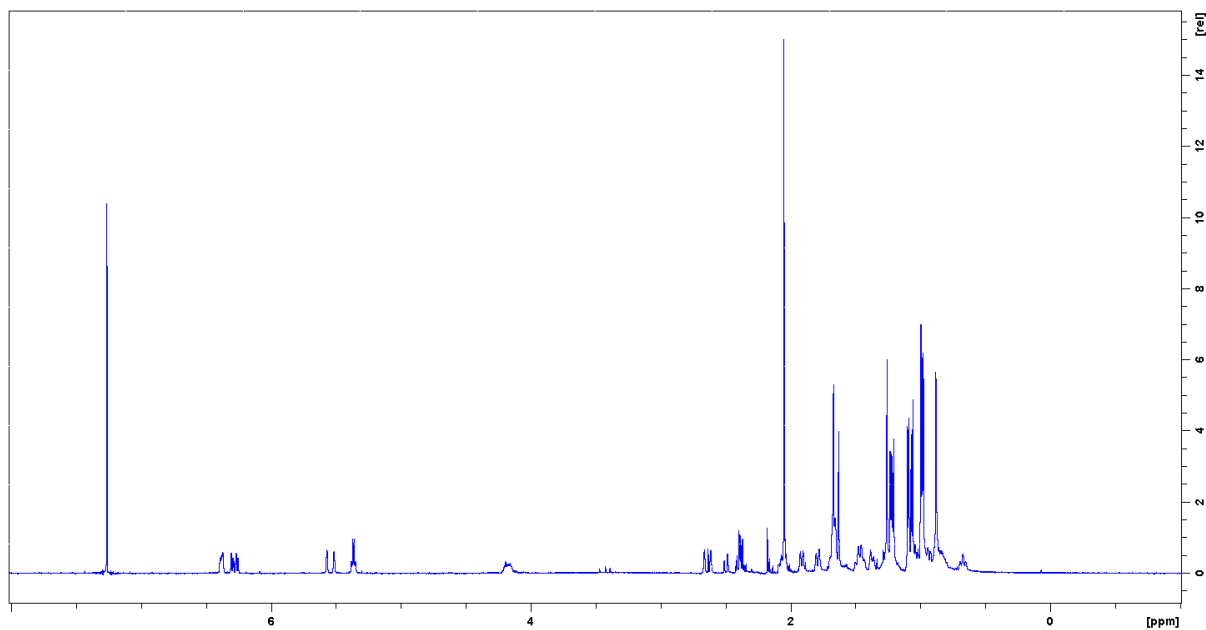

Figure S-78. <sup>1</sup>H NMR spectrum of compound 12 (CDCl<sub>3</sub>, 600 MHz).

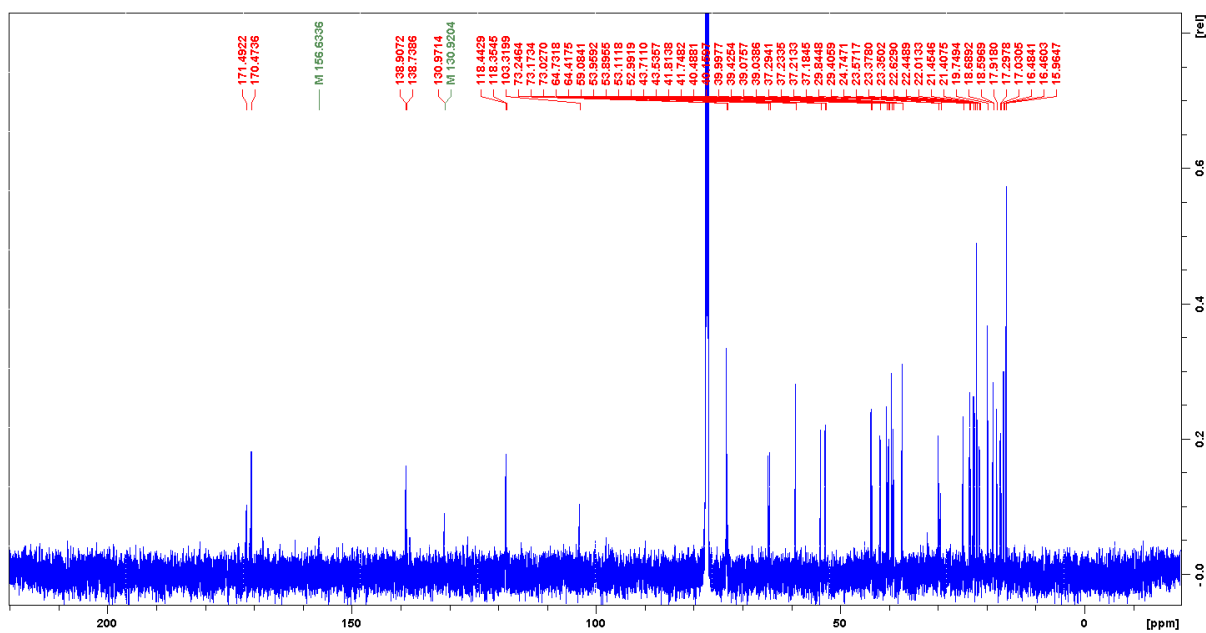

Figure S-79. <sup>13</sup>C NMR spectrum of compound 12 (CDCl<sub>3</sub>, 150 MHz).

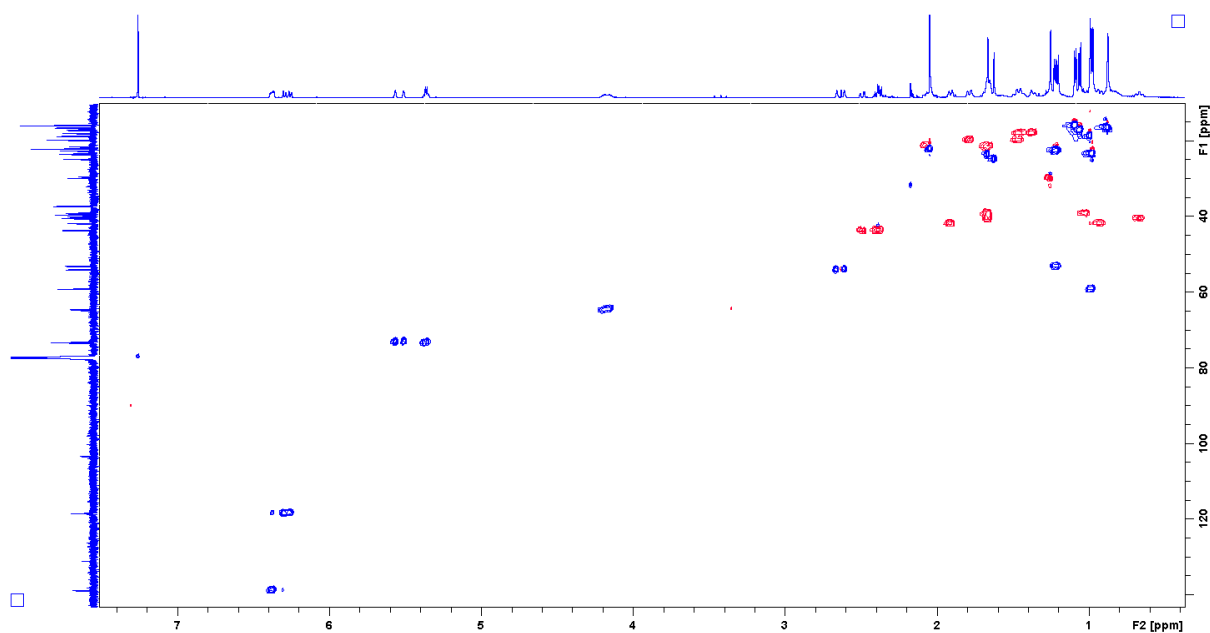

**Figure S-80.** HSQC spectrum of compound **12** (CDCl<sub>3</sub>, 600 MHz).

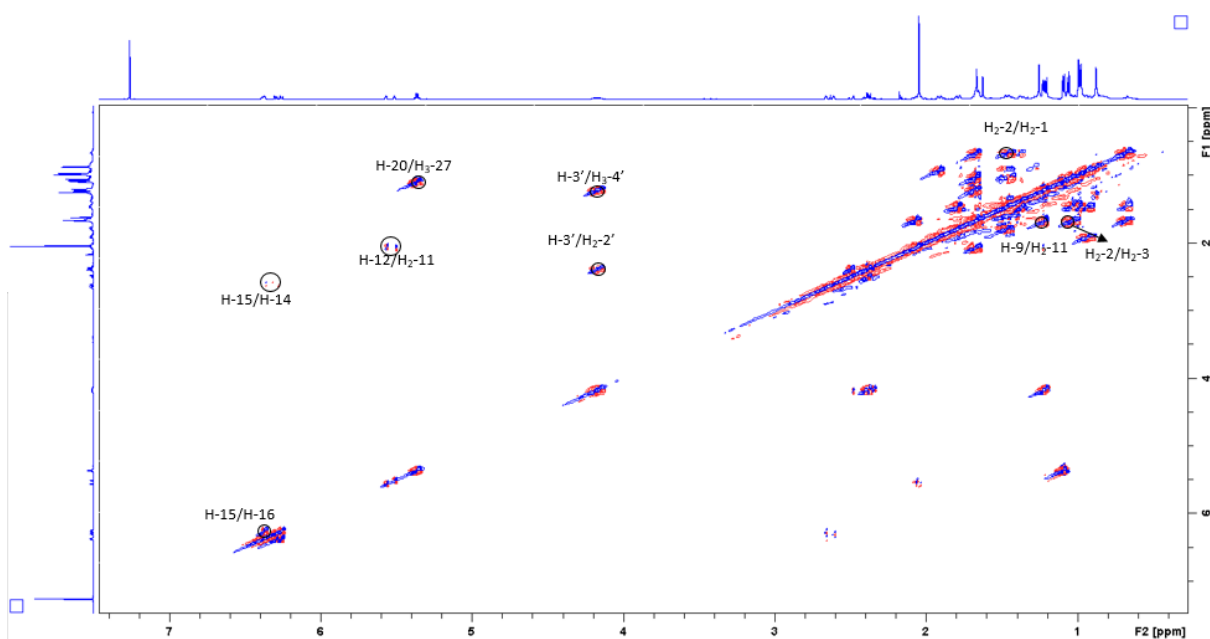

**Figure S-81.** <sup>1</sup>H-<sup>1</sup>H COSY spectrum of compound **12** (CDCl<sub>3</sub>, 600 MHz).



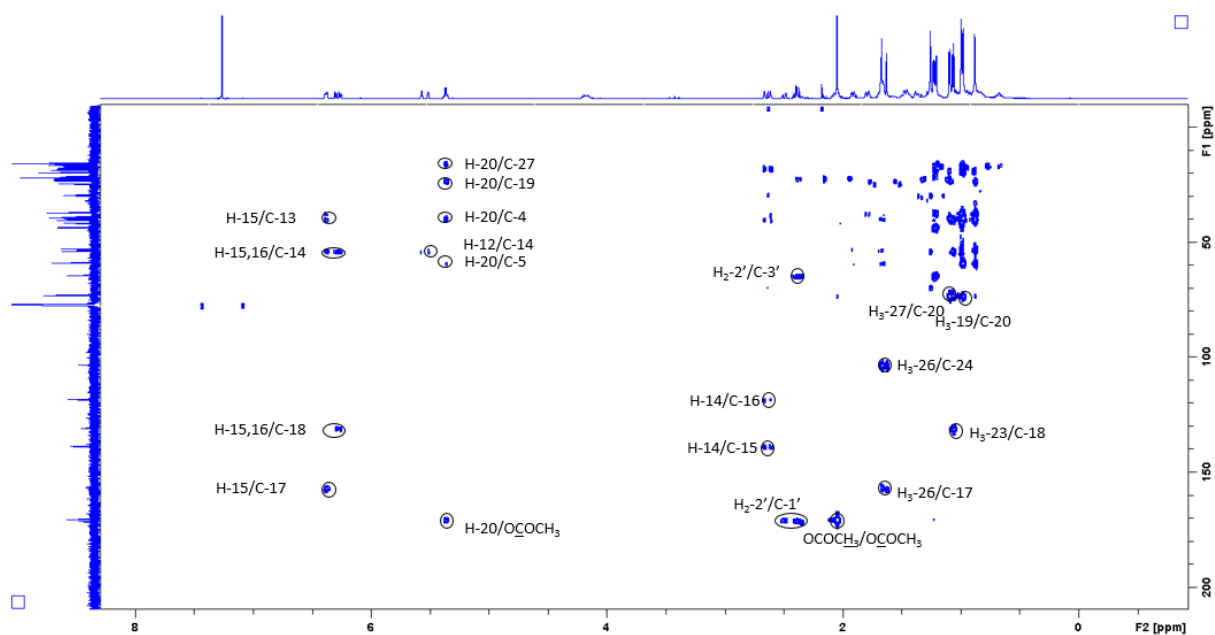

**Figure S-82.** HMBC spectrum of compound **12** (CDCl<sub>3</sub>, 600 MHz).

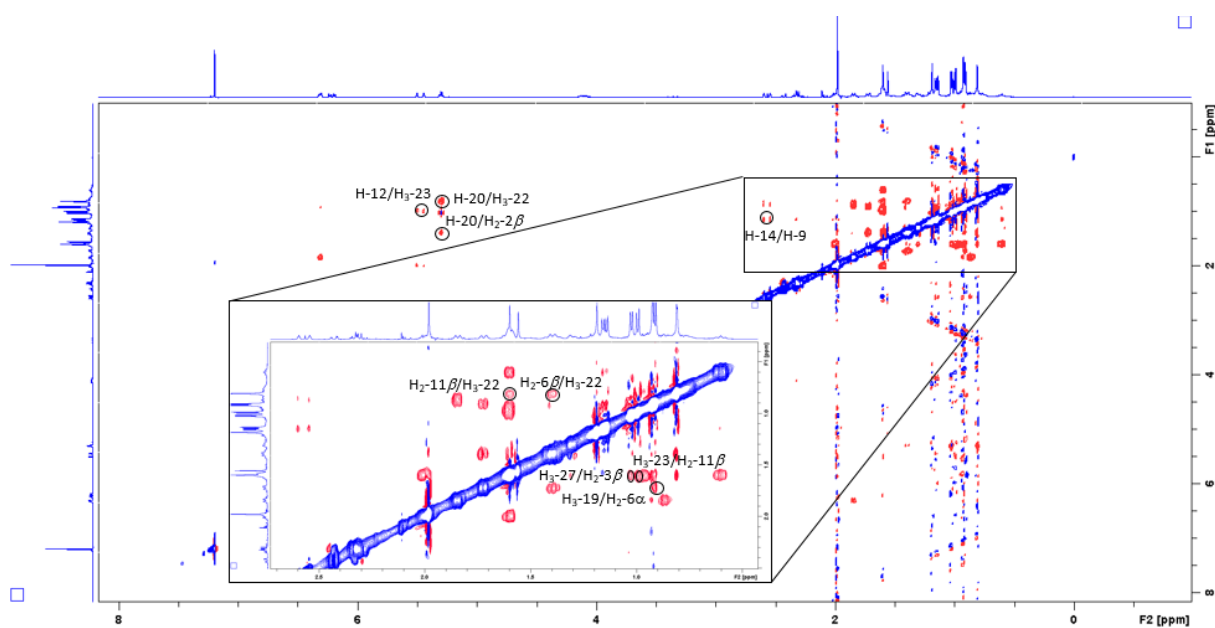

**Figure S-83.** NOESY spectrum of compound **12** (CDCl<sub>3</sub>, 600 MHz).

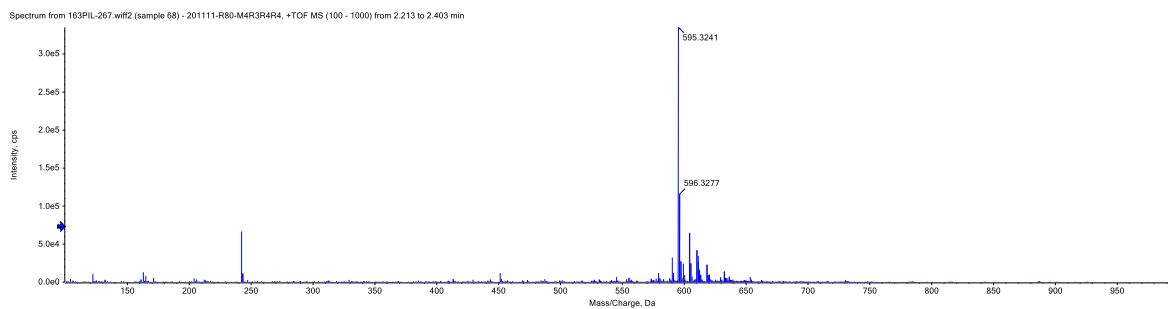

**Figure S-84.** HRMS spectrum of compound **12**.

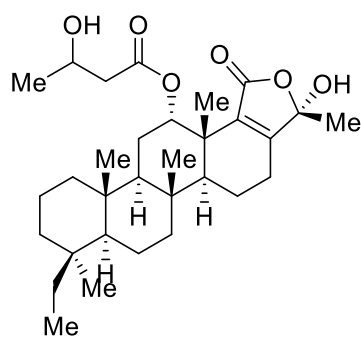

**13**

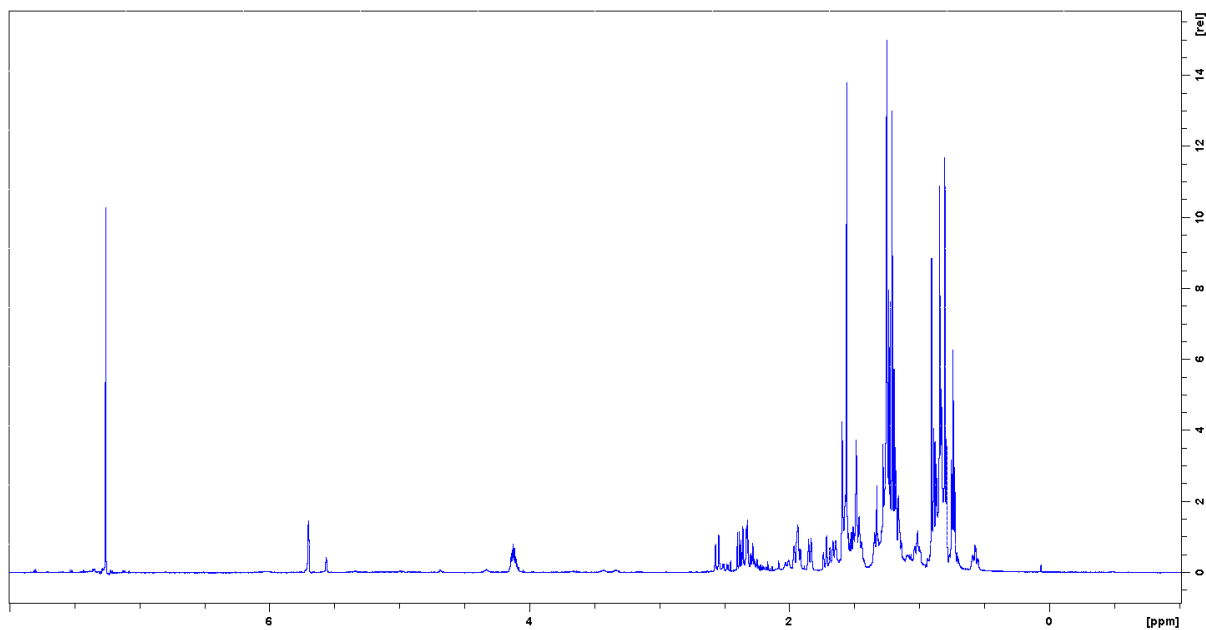

**Figure S-85.**  $^1\text{H}$  NMR spectrum of compound **13** ( $\text{CDCl}_3$ , 600 MHz).

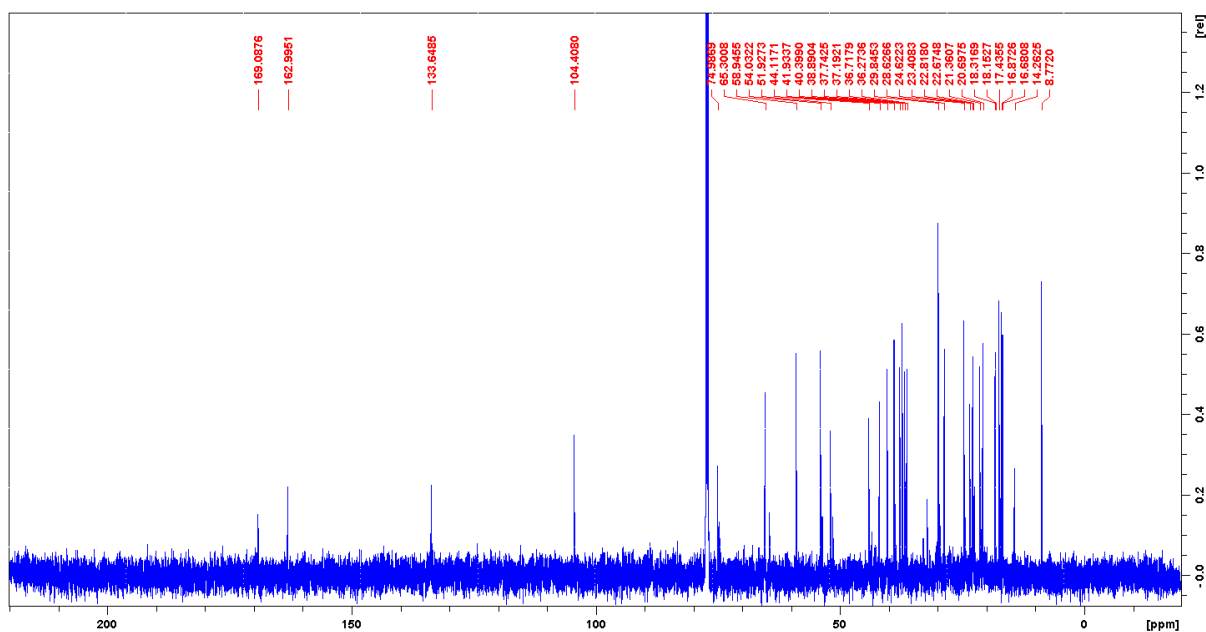

**Figure S-86.**  $^{13}\text{C}$  NMR spectrum of compound **13** ( $\text{CDCl}_3$ , 150 MHz).

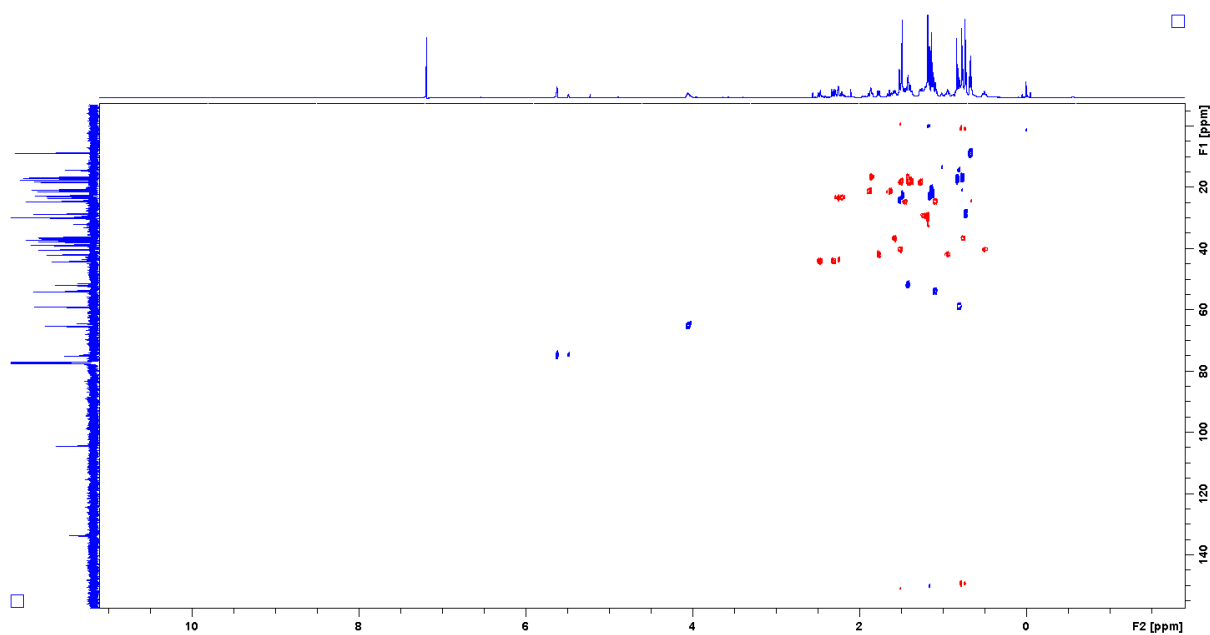

**Figure S-87.** HSQC spectrum of compound **13** (CDCl<sub>3</sub>, 600 MHz).

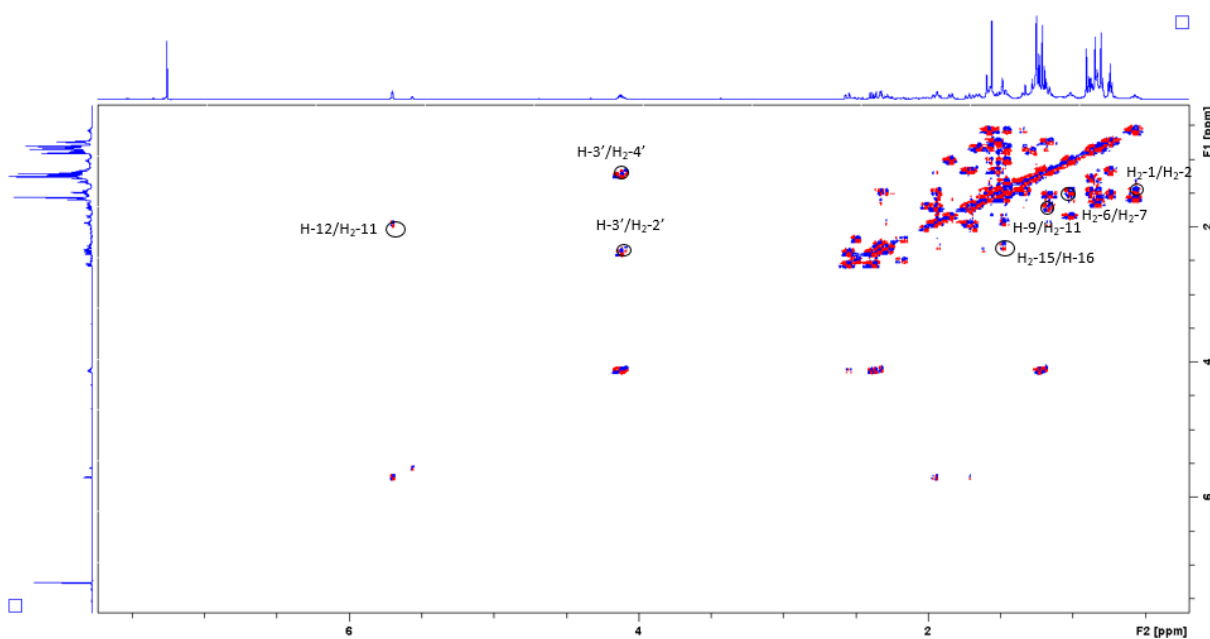

**Figure S-88.** <sup>1</sup>H-<sup>1</sup>H COSY spectrum of compound **13** (CDCl<sub>3</sub>, 600 MHz).

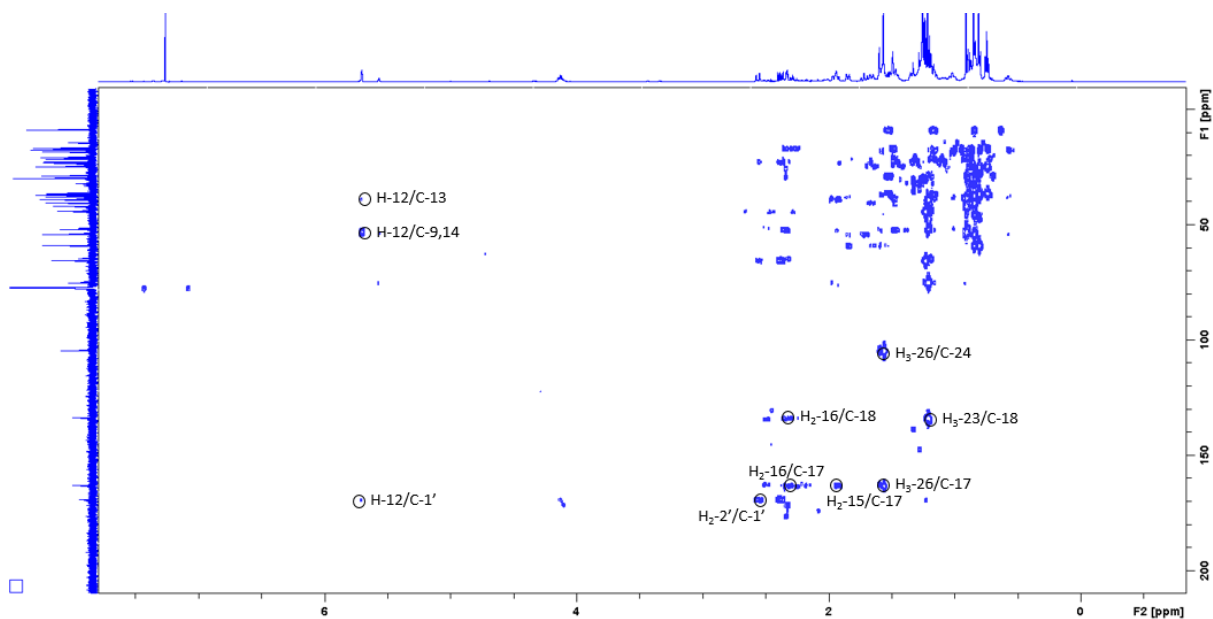

**Figure S-89.** HMBC spectrum of compound **13** (CDCl<sub>3</sub>, 600 MHz).

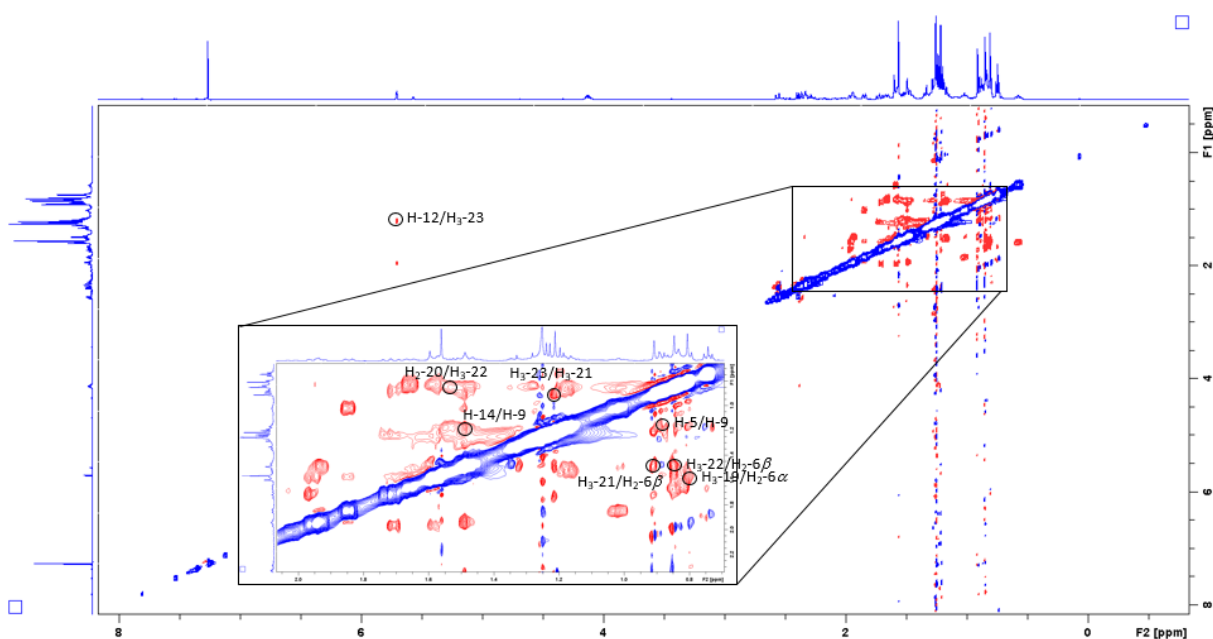

**Figure S-90.** NOESY spectrum of compound **13** (CDCl<sub>3</sub>, 600 MHz).

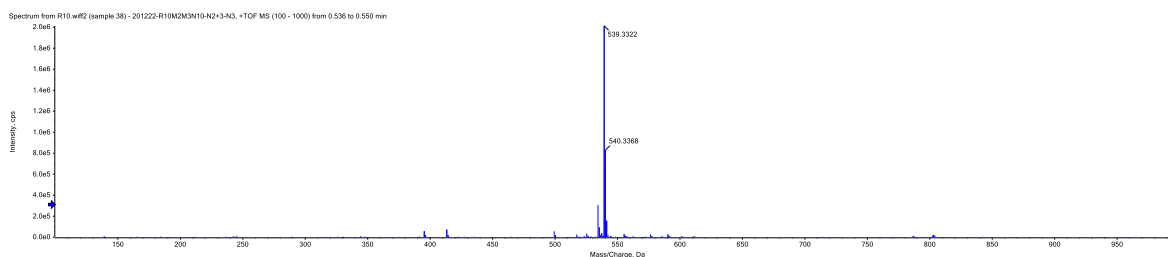

**Figure S-91.** HRMS spectrum of compound **13**.

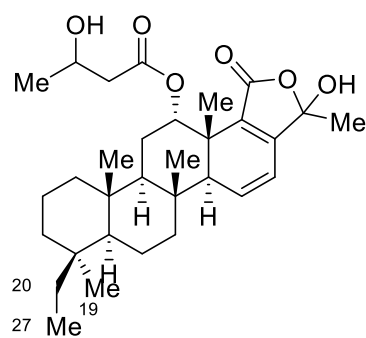

**14**

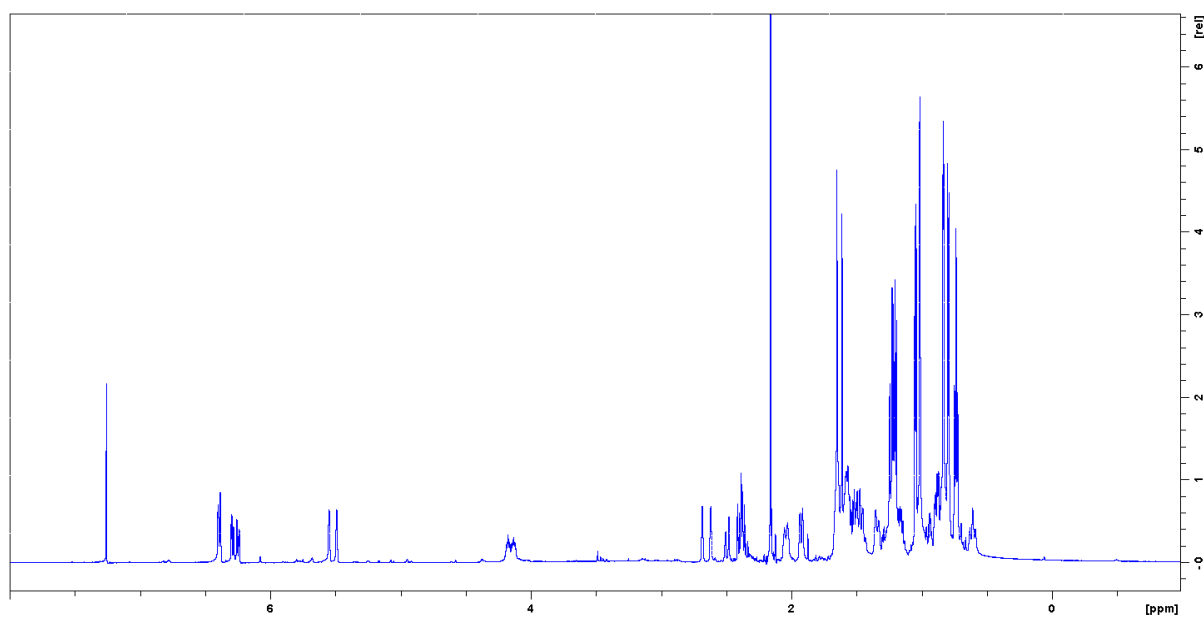

**Figure S-92.**  $^1\text{H}$  NMR spectrum of compound **14** ( $\text{CDCl}_3$ , 600 MHz).

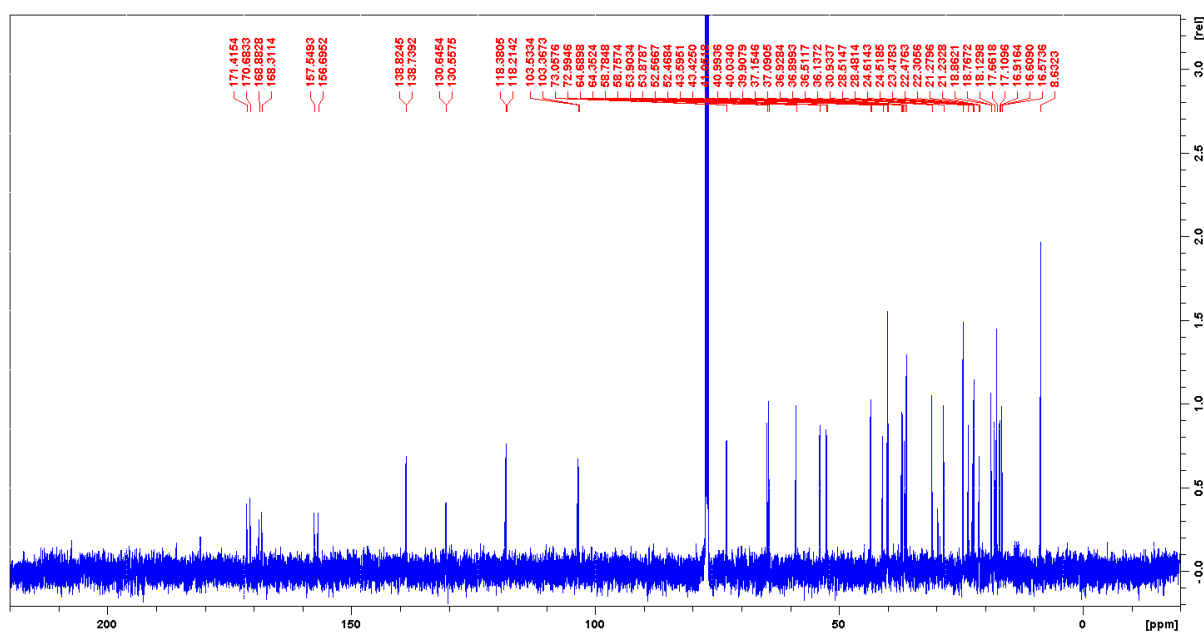

**Figure S-93.**  $^{13}\text{C}$  NMR spectrum of compound **14** ( $\text{CDCl}_3$ , 150 MHz).

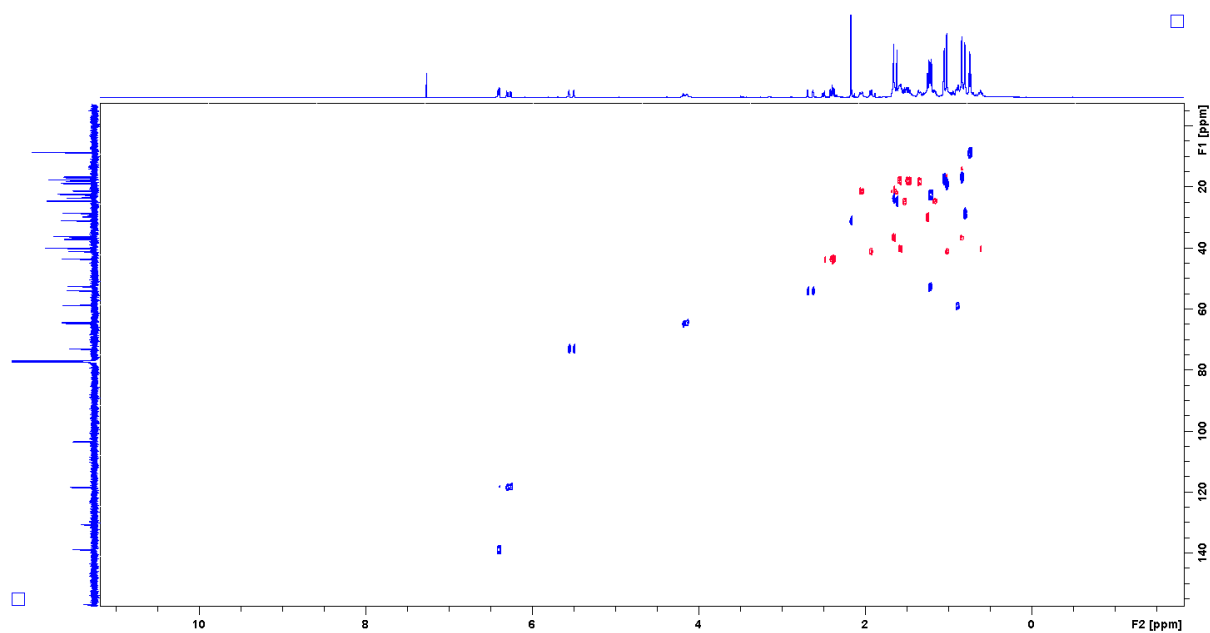

**Figure S-94.** HSQC spectrum of compound **14** (CDCl<sub>3</sub>, 600 MHz).

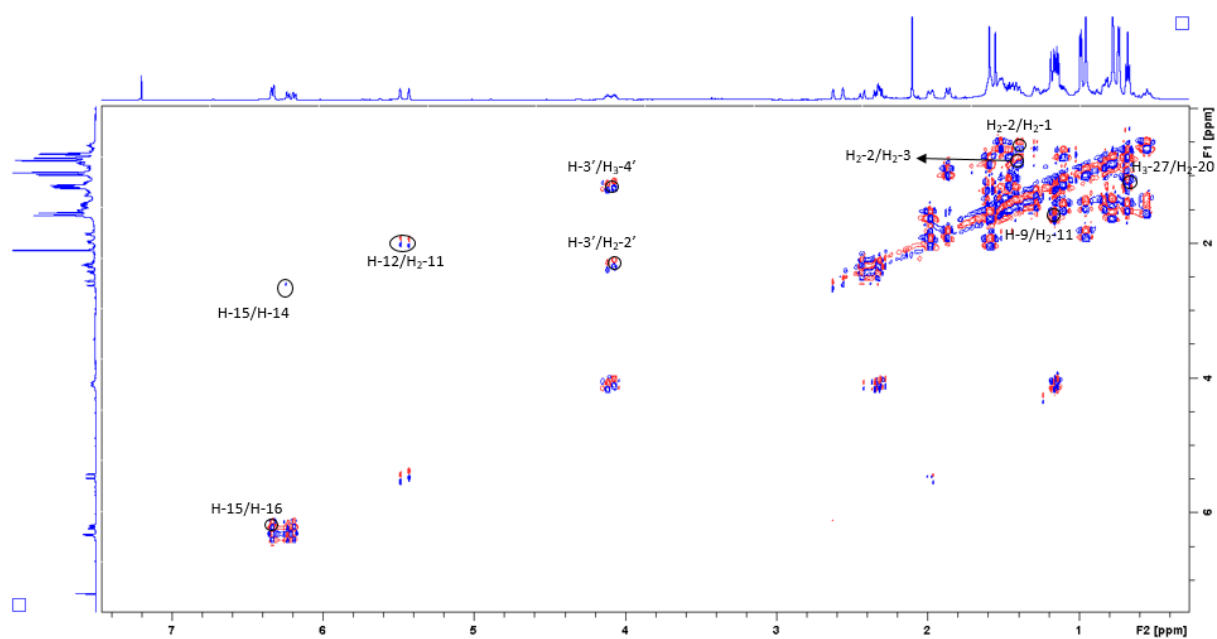

**Figure S-95.** <sup>1</sup>H-<sup>1</sup>H COSY spectrum of compound **14** (CDCl<sub>3</sub>, 600 MHz).

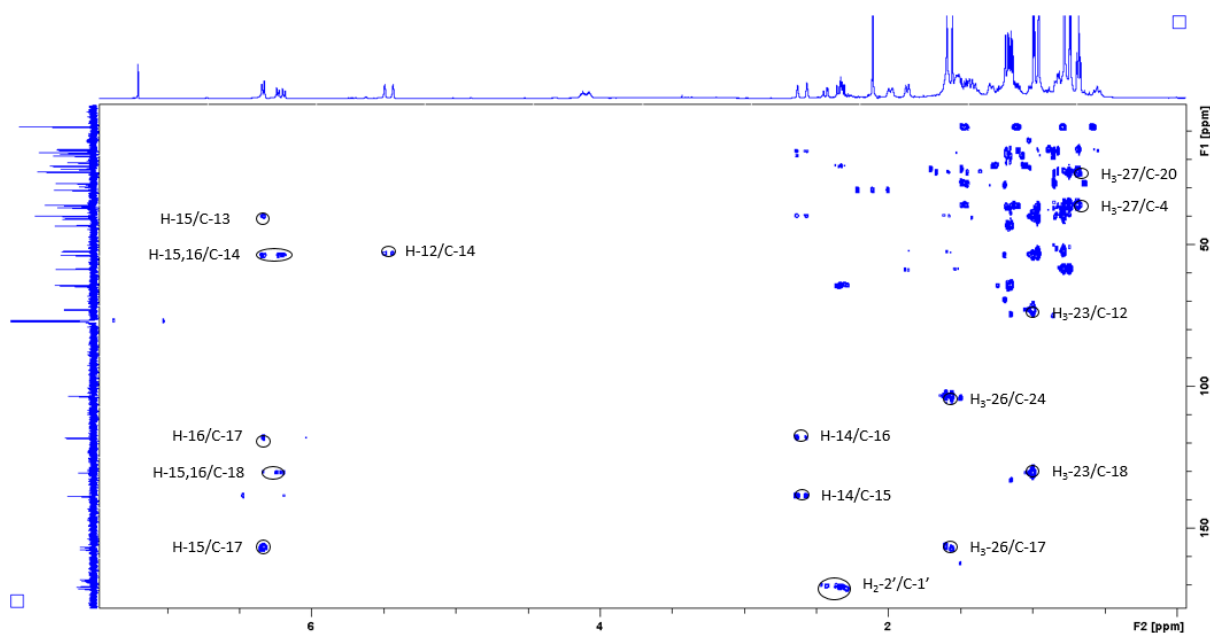

**Figure S-96.** HMBC spectrum of compound **14** (CDCl<sub>3</sub>, 600 MHz).

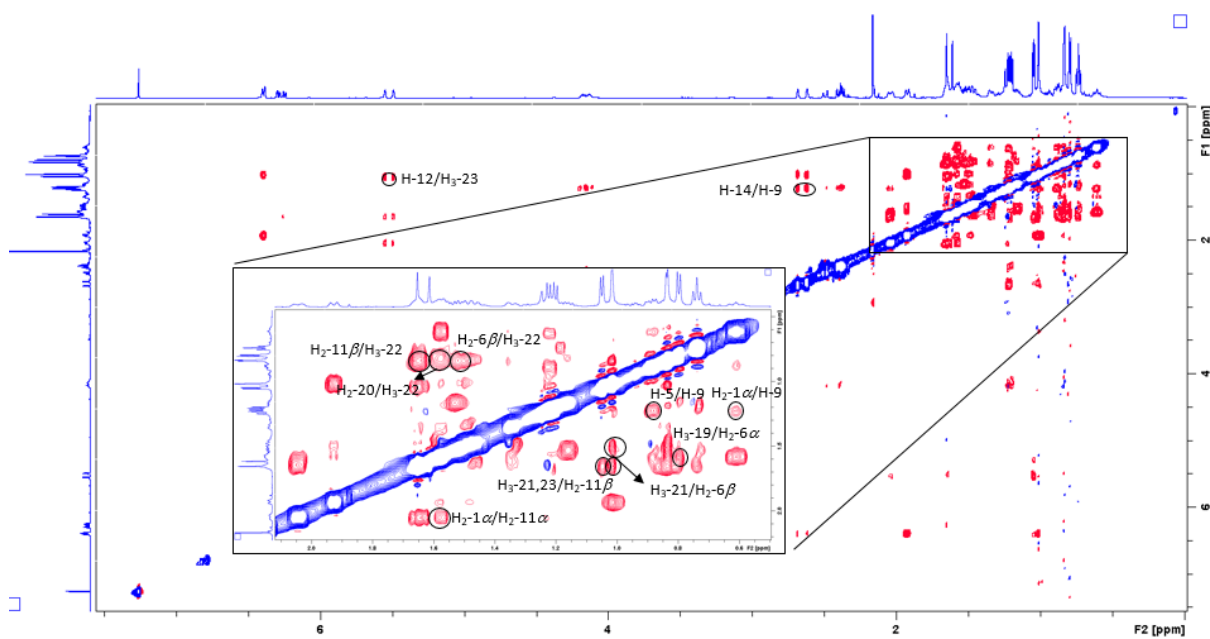

**Figure S-97.** NOESY spectrum of compound **14** (CDCl<sub>3</sub>, 600 MHz).

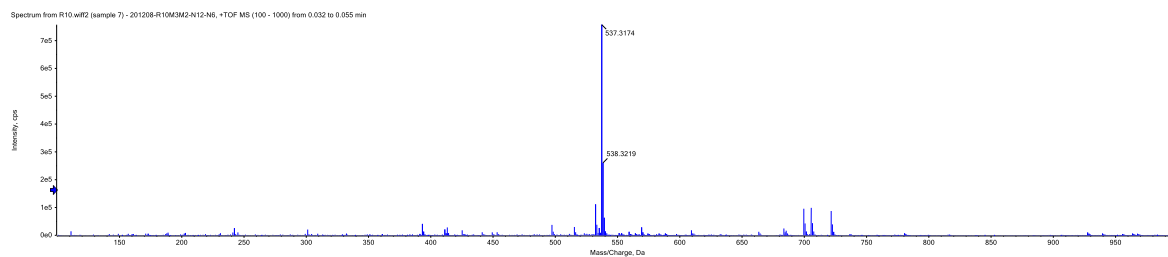

**Figure S-98.** HRMS spectrum of compound **14**.

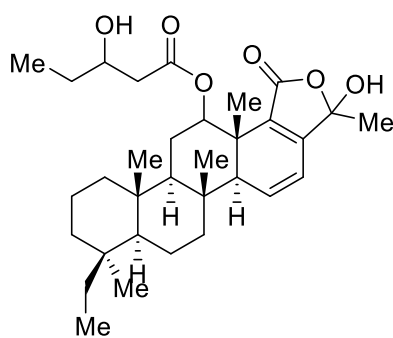

**15**

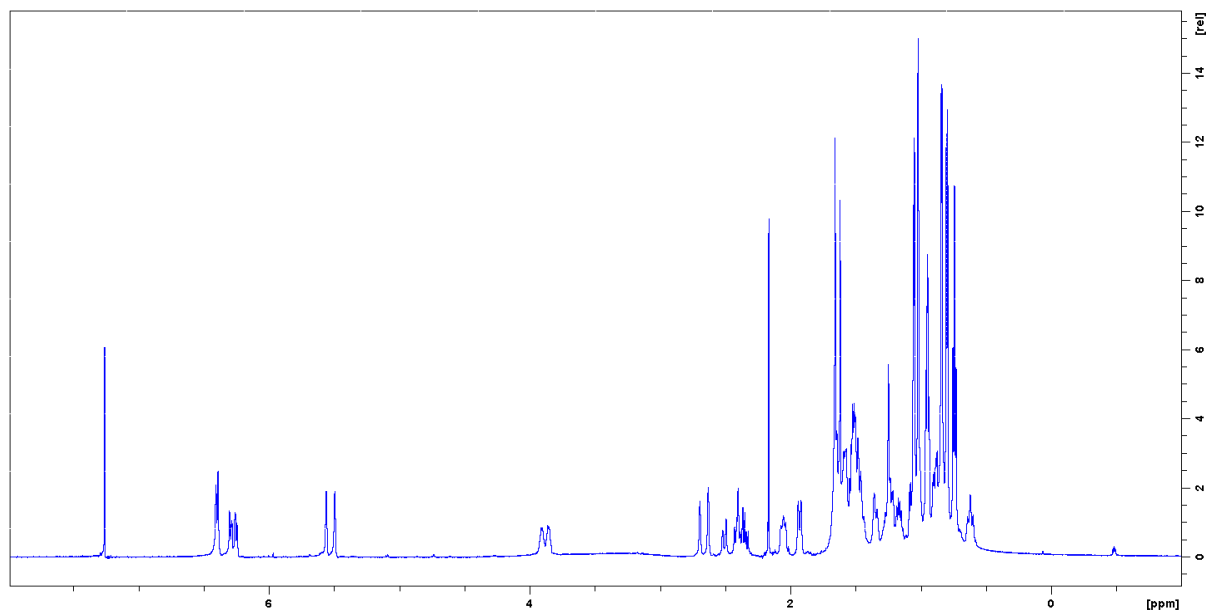

**Figure S-99.** <sup>1</sup>H NMR spectrum of compound **15** (CDCl<sub>3</sub>, 600 MHz).

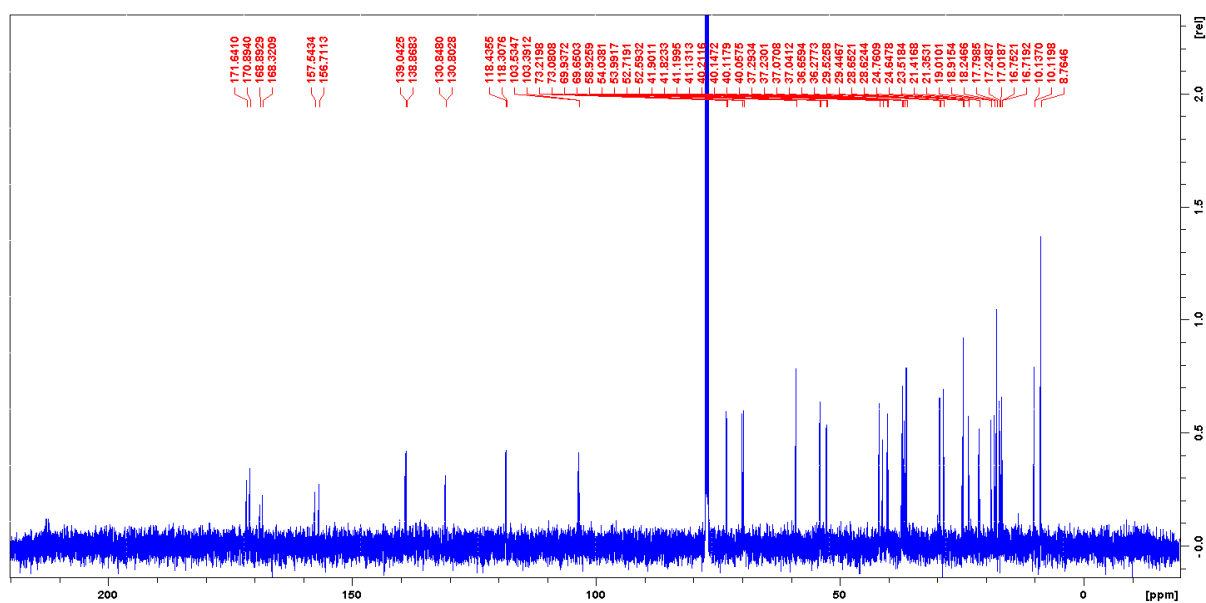

**Figure S-100.** <sup>13</sup>C NMR spectrum of compound **15** (CDCl<sub>3</sub>, 150 MHz).



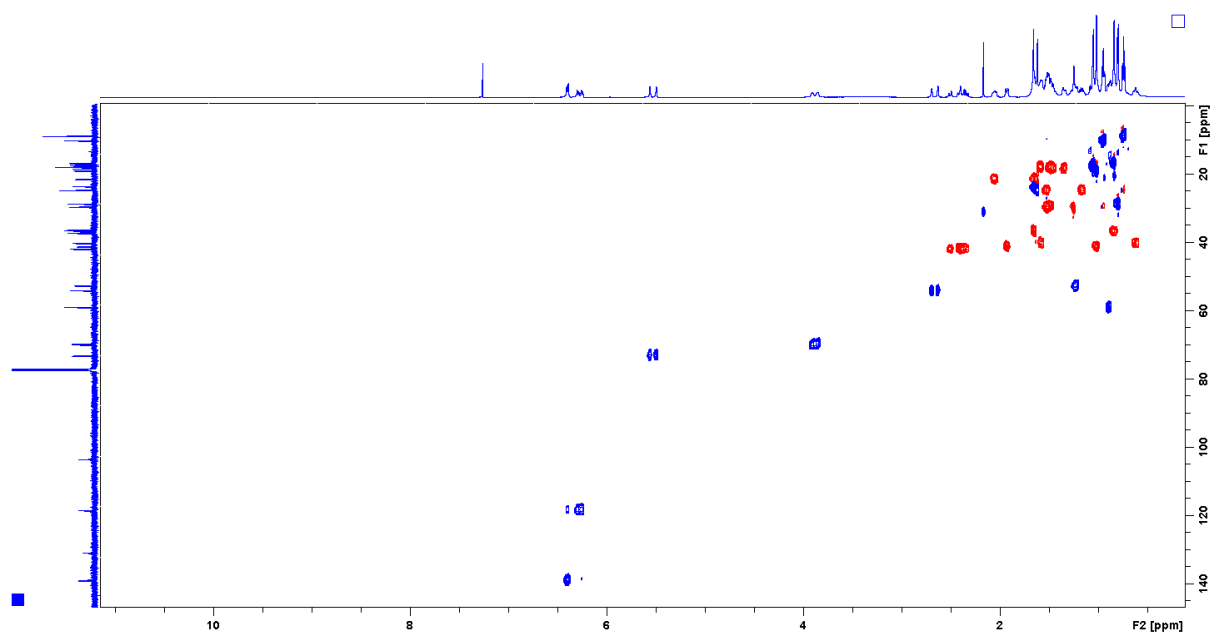

**Figure S-101.** HSQC spectrum of compound **15** (CDCl<sub>3</sub>, 600 MHz).

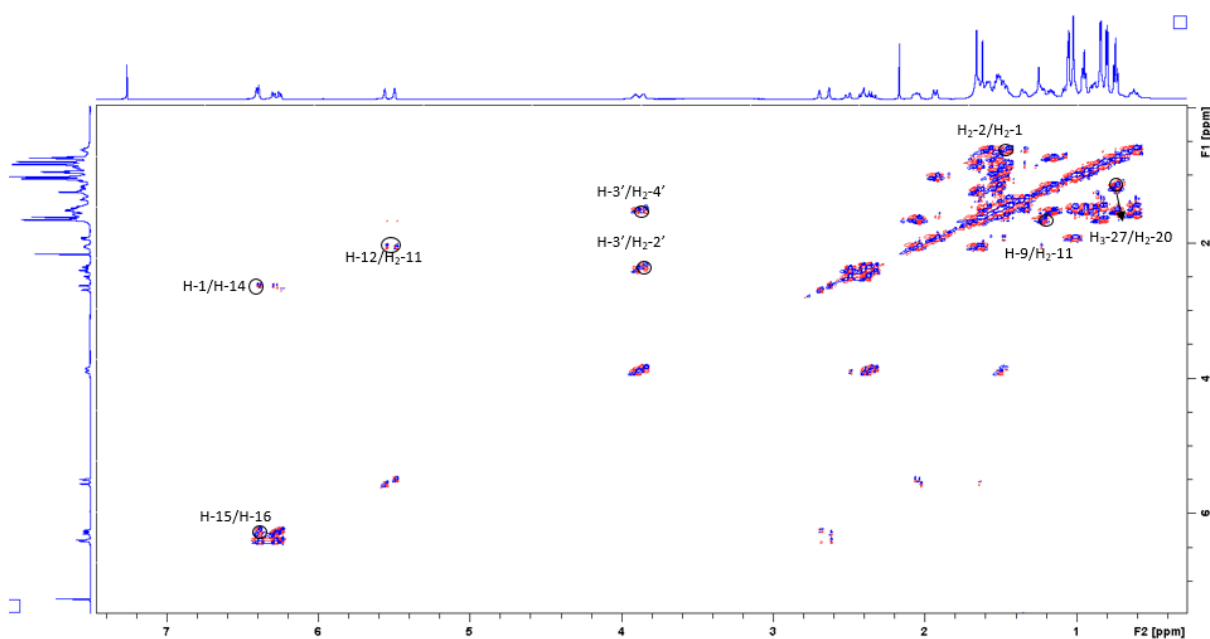

**Figure S-102.** <sup>1</sup>H-<sup>1</sup>H COSY spectrum of compound **15** (CDCl<sub>3</sub>, 600 MHz).

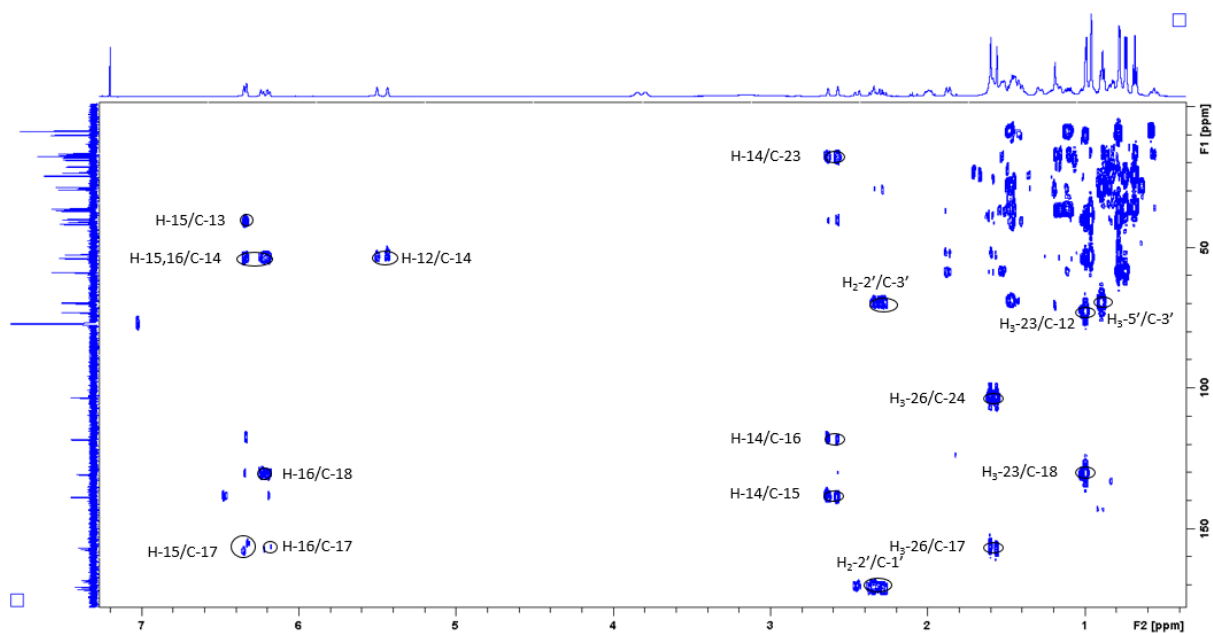

**Figure S-103.** HMBC spectrum of compound **15** ( $\text{CDCl}_3$ , 600 MHz).

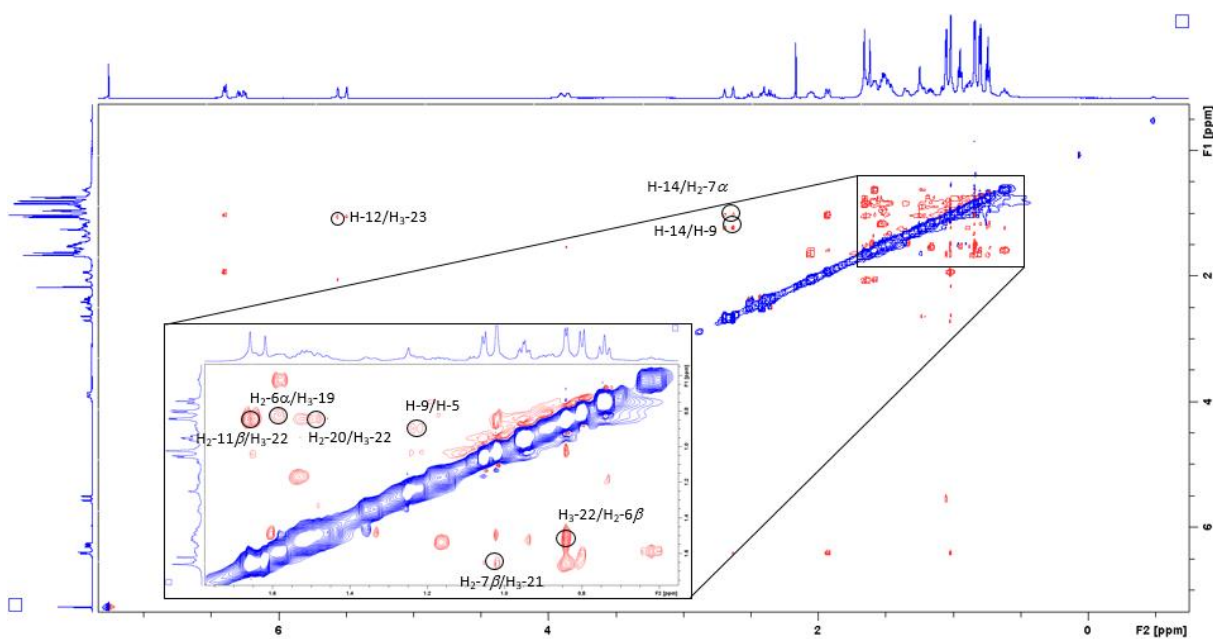

**Figure S-104.** NOESY spectrum of compound **15** ( $\text{CDCl}_3$ , 600 MHz).

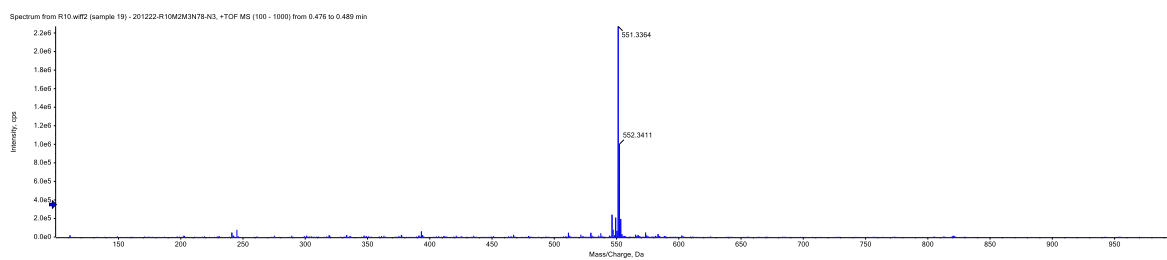

**Figure S-105.** HRMS spectrum of compound **15**.

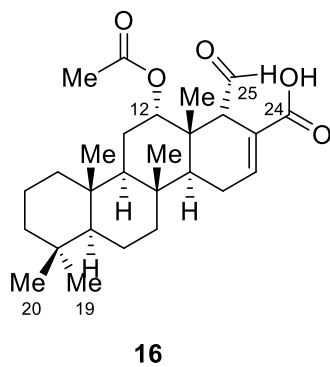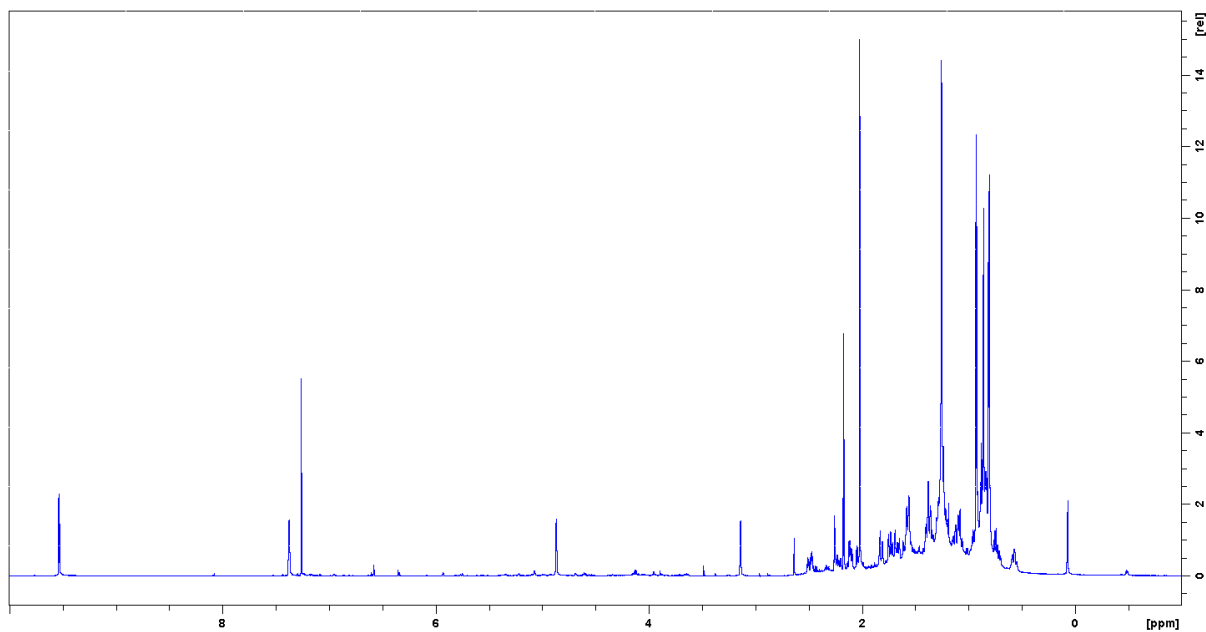

**Figure S-106.**  $^1\text{H}$  NMR spectrum of compound **16** ( $\text{CDCl}_3$ , 600 MHz).

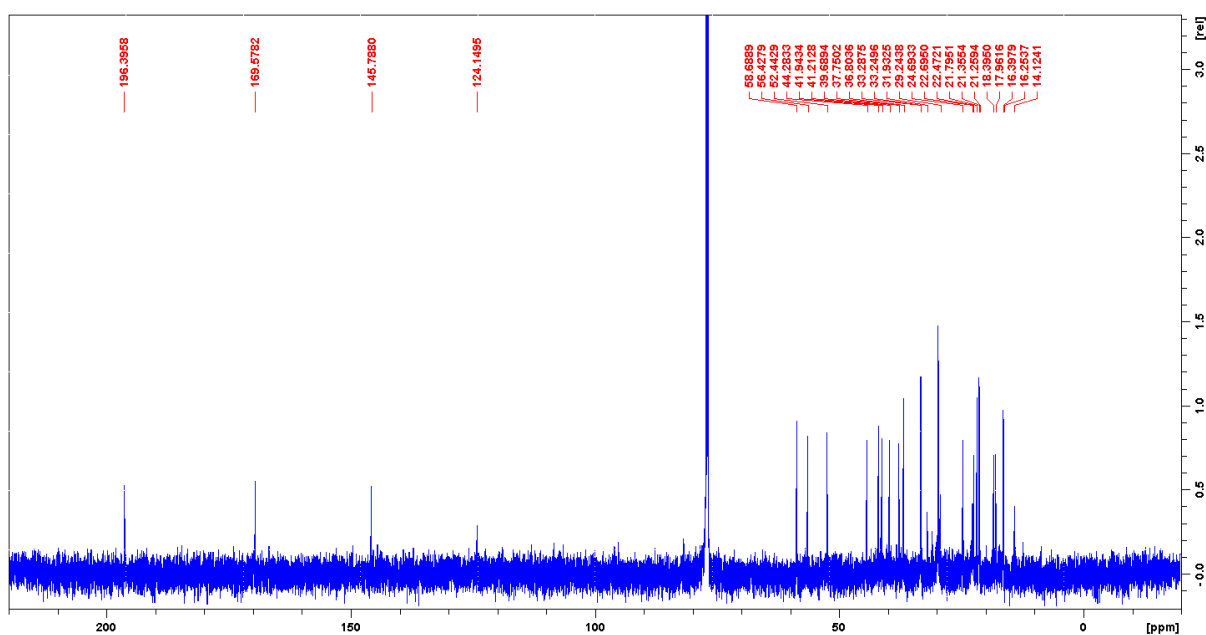

**Figure S-107.**  $^{13}\text{C}$  NMR spectrum of compound **16** ( $\text{CDCl}_3$ , 150 MHz).

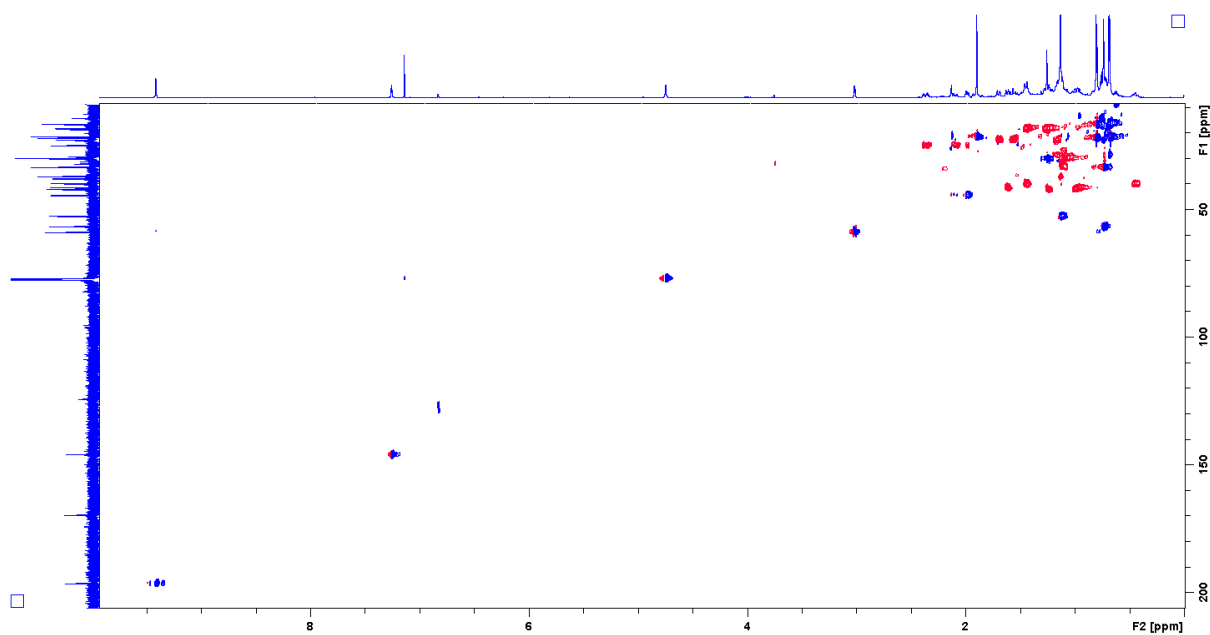

Figure S-108. HSQC spectrum of compound **16** ( $\text{CDCl}_3$ , 600 MHz).

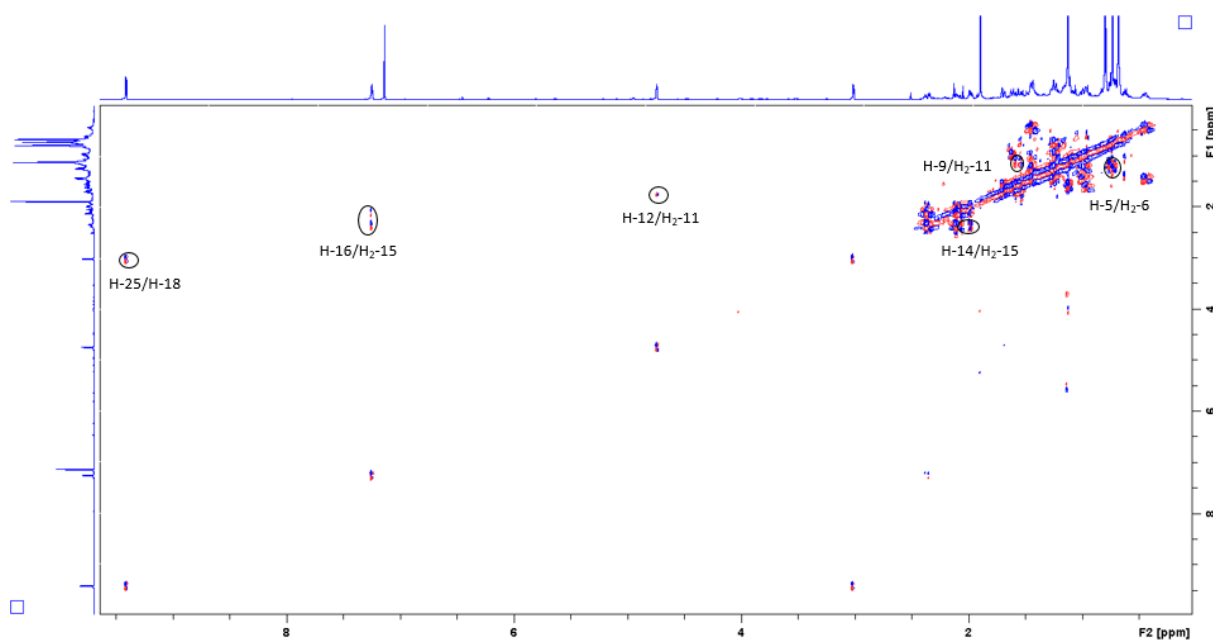

Figure S-109.  $^1\text{H}$ - $^1\text{H}$  COSY spectrum of compound **16** ( $\text{CDCl}_3$ , 600 MHz).

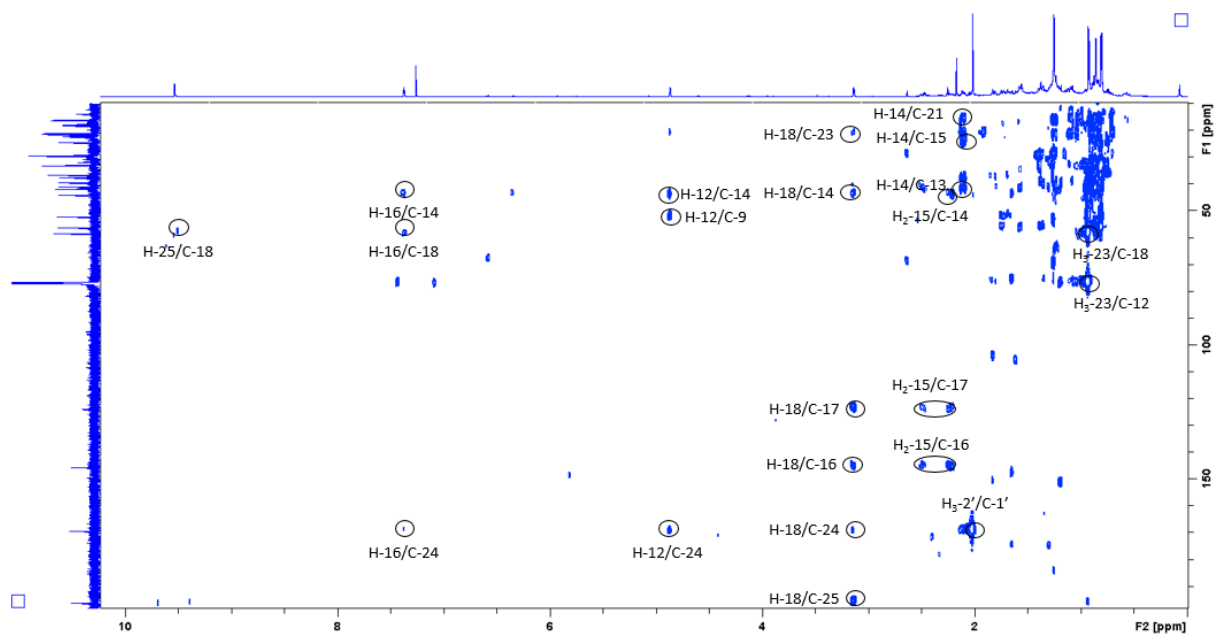

Figure S-110. HMBC spectrum of compound 16 (CDCl<sub>3</sub>, 600 MHz).

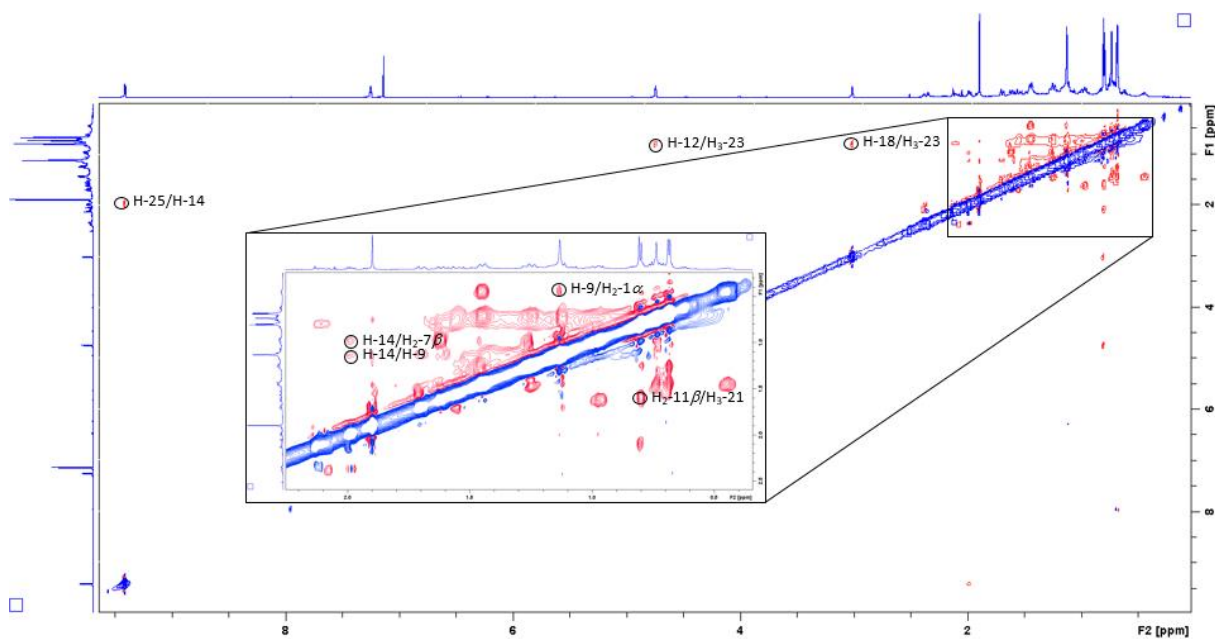

Figure S-111. NOESY spectrum of compound 16 (CDCl<sub>3</sub>, 600 MHz).

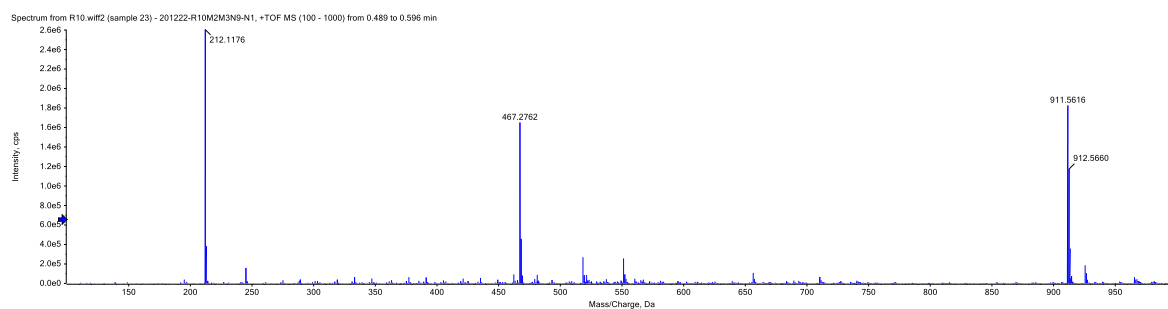

Figure S-112. HRMS spectrum of compound 16.
