# Supplementary material for: Isolation of Scalarane-Type Sesterterpenoids from the Marine Sponge Dysidea sp. and Stereochemical Reassignment of 12-epi-Phyllactone D/E
Source: MDPI journal article supplement (doi:10.3390/md19110627), 2021-11-09
Supplement: s1 [file s1]

Supporting Information

Isolation of Scalarane-type Sesterterpenoids from the  
Marine Sponge *Dysidea* sp. and Stereochemical  
Reassignment of 12-*epi*-phyllactone D/E

*A-Young Shin,<sup>1,2</sup> Arang Son,<sup>3</sup> Changhoon Choi,<sup>3</sup>*

*and Jihoon Lee<sup>\*1,2</sup>*

<sup>1</sup>Korea Institute of Ocean Science and Technology (KIOST), Busan 49111, Republic of Korea

<sup>2</sup>Department of Marine Biotechnology, University of Science and Technology (UST), Daejeon 34113,  
Republic of Korea

<sup>3</sup>Department of Radiation Oncology, Samsung Medical Center, Seoul 06351, Republic of Korea

# Table of contents

|                                                                                                                                                                                                                                                |    |
|------------------------------------------------------------------------------------------------------------------------------------------------------------------------------------------------------------------------------------------------|----|
| I. Experimental procedure .....                                                                                                                                                                                                                | 3  |
| 1. General information .....                                                                                                                                                                                                                   | 3  |
| <b>Figure S1.</b> Structures of known compounds isolated from <i>Dysidea</i> sp. ....                                                                                                                                                          | 3  |
| <b>Table S1.</b> <sup>13</sup> C (150 MHz) and <sup>1</sup> H (600 MHz) NMR data for compound <b>1</b> . ....                                                                                                                                  | 4  |
| <b>Table S2.</b> <sup>13</sup> C (150 MHz) and <sup>1</sup> H (600 MHz) NMR data for compound <b>2</b> . ....                                                                                                                                  | 5  |
| <b>Table S3.</b> <sup>13</sup> C (150 MHz) and <sup>1</sup> H (600 MHz) NMR data for compound <b>3</b> . ....                                                                                                                                  | 6  |
| <b>Table S4.</b> <sup>13</sup> C (150 MHz) and <sup>1</sup> H (600 MHz) NMR data for compound <b>4</b> . ....                                                                                                                                  | 7  |
| <b>Table S5.</b> <sup>13</sup> C (150 MHz) and <sup>1</sup> H (600 MHz) NMR data for compound <b>5</b> . ....                                                                                                                                  | 8  |
| <b>Table S6.</b> <sup>13</sup> C (150 MHz) and <sup>1</sup> H (600 MHz) NMR data for compound <b>6</b> . ....                                                                                                                                  | 9  |
| <b>Table S7.</b> <sup>13</sup> C (150 MHz) and <sup>1</sup> H (600 MHz) NMR data for compound <b>7</b> . ....                                                                                                                                  | 10 |
| <b>Table S8.</b> <sup>13</sup> C (150 MHz) and <sup>1</sup> H (600 MHz) NMR data for compound <b>8</b> . ....                                                                                                                                  | 11 |
| <b>Table S9.</b> <sup>13</sup> C (150 MHz) and <sup>1</sup> H (600 MHz) NMR data for compound <b>9</b> . ....                                                                                                                                  | 12 |
| <b>Table S10.</b> <sup>13</sup> C (150 MHz) and <sup>1</sup> H (600 MHz) NMR data for compound <b>10</b> . ....                                                                                                                                | 13 |
| <b>Table S11.</b> <sup>13</sup> C (150 MHz) and <sup>1</sup> H (600 MHz) NMR data for compound <b>11</b> . ....                                                                                                                                | 14 |
| <b>Table S12.</b> <sup>13</sup> C (150 MHz) and <sup>1</sup> H (600 MHz) NMR data for compound <b>12</b> . ....                                                                                                                                | 15 |
| <b>Table S13.</b> <sup>13</sup> C (150 MHz) and <sup>1</sup> H (600 MHz) NMR data for compound <b>13</b> . ....                                                                                                                                | 16 |
| <b>Table S14.</b> <sup>13</sup> C (150 MHz) and <sup>1</sup> H (600 MHz) NMR data for compound <b>14</b> . ....                                                                                                                                | 17 |
| <b>Table S15.</b> <sup>13</sup> C (150 MHz) and <sup>1</sup> H (600 MHz) NMR data for compound <b>15</b> . ....                                                                                                                                | 18 |
| <b>Table S16.</b> <sup>13</sup> C (150 MHz) and <sup>1</sup> H (600 MHz) NMR data for compound <b>16</b> . ....                                                                                                                                | 19 |
| <b>Figure S2.</b> Key <sup>1</sup> H- <sup>1</sup> H COSY and HMBC correlations of compounds <b>1-16</b> .....                                                                                                                                 | 20 |
| <b>Figure S3.</b> Key NOESY correlations of compounds <b>1-16</b> . ....                                                                                                                                                                       | 21 |
| <b>Table S17.</b> <sup>13</sup> C chemical shifts of phyllactone D/E ( <b>17, 18</b> ), 12- <i>epi</i> -phyllactone D/E ( <b>15</b> ) analyzed by Li et al <sup>1</sup> , Andersen et al <sup>2</sup> , and our experimental data. ....        | 23 |
| <b>Table S18.</b> <sup>1</sup> H chemical shifts of phyllactone D/E ( <b>17, 18</b> ), 12- <i>epi</i> -phyllactone D/E ( <b>15</b> ) analyzed by Li et al <sup>1</sup> , Andersen et al <sup>2</sup> , and our experimental data. ....         | 24 |
| <b>Table S19.</b> <sup>13</sup> C chemical shifts of representative examples of 12 $\alpha$ -epimers ( <b>3, 4, 12, 14, 15</b> ) and 12 $\beta$ -epimers ( <b>17, 18, 20, 21</b> ). ....                                                       | 25 |
| <b>Figure S4.</b> Comparison of $ \Delta c $ values at C-9, 11, 12, 14, 23 for 12 $\alpha$ -epimers ( <b>3, 4, 12, 14, 15</b> ) and 12 $\beta$ -epimers ( <b>17, 18, 20, 21</b> ) relative to those reported by Li et al. ....                 | 26 |
| <b>Figure S5.</b> Comparison of $ \Delta c $ values at C-9, 11, 12, 14, 23 for 12 $\alpha$ -epimers ( <b>3, 4, 12, 14</b> ) and 12 $\beta$ -epimers ( <b>17, 18, 20, 21</b> , Li et al) relative to our experimental data for <b>15</b> . .... | 26 |
| II. Computational methods.....                                                                                                                                                                                                                 | 27 |
| 1. Geometry optimization.....                                                                                                                                                                                                                  | 27 |

# I. Experimental procedure

## 1. General information

Specific optical rotations were obtained on a Rudolph Research Analytical (Autopol III) polarimeter. IR spectra were recorded on a JASCO FT/IR-4100 spectrophotometer. The 1D ( $^1\text{H}$  and  $^{13}\text{C}$ ) and 2D (COSY, HSQC, HMBC, and NOESY) NMR spectra were taken in  $\text{CDCl}_3$  at Bruker 600 MHz spectrometer. High resolution mass-spectra were obtained on a Sciex X500R Q-TOF spectrometer (Framingham, MA, USA). equipped with an ESI source. MPLC was performed using the TELEDYNE ISCO CombiFlash Companion with the TELEDYNE ISCO RediSep Normal-phase Silica Flash Column. HPLC was performed on a PrimeLine Binary pump utilizing Silica columns (YMC-Pack Silica,  $250 \times 10$  mm I.D., or  $250 \times 4.6$  mm I.D.,  $5 \mu\text{m}$ ), the Shodex RI-101, or the UV-M201.

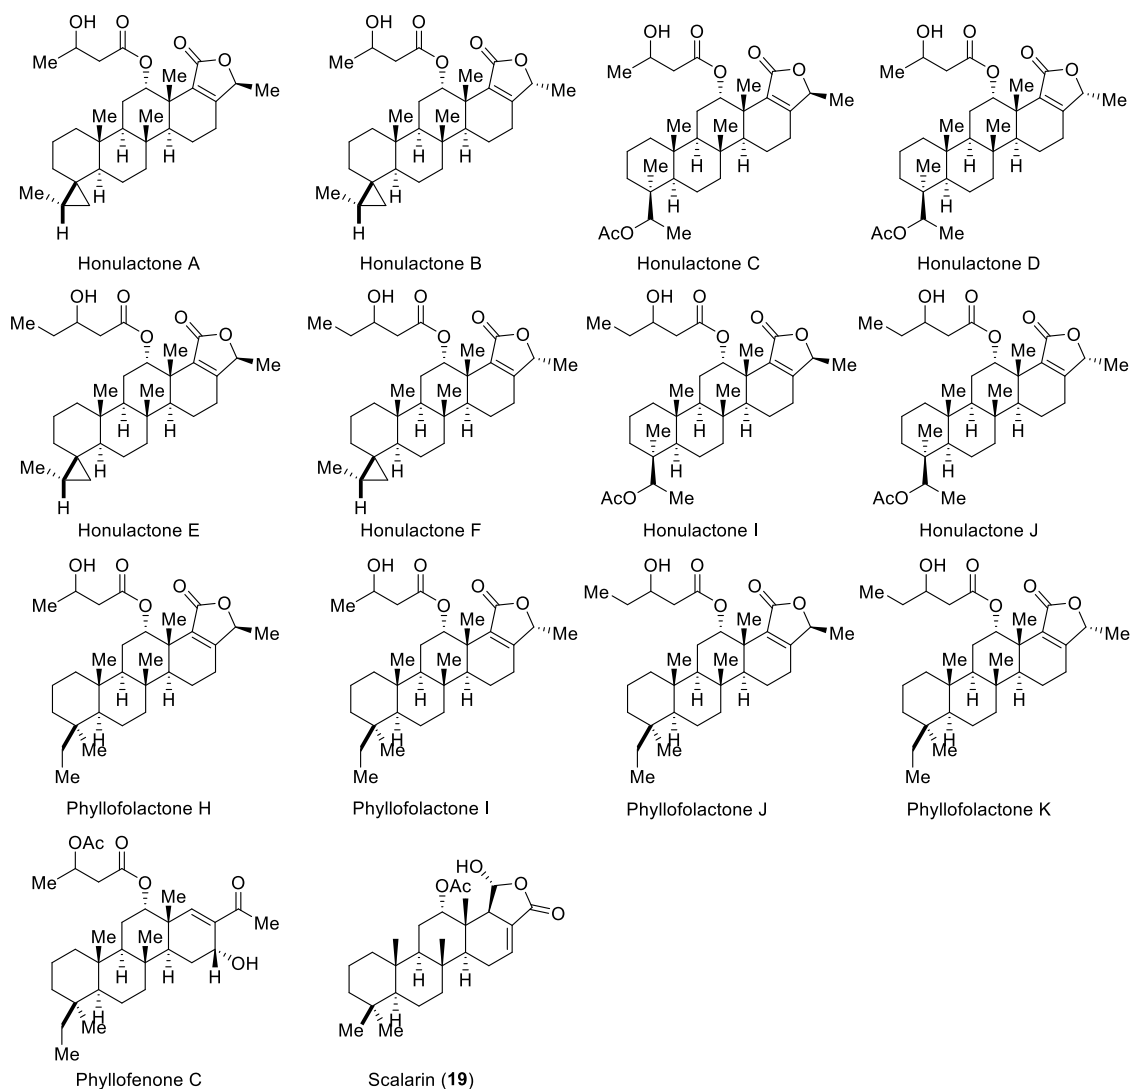

**Figure S1.** Structures of known compounds isolated from *Dysidea* sp.

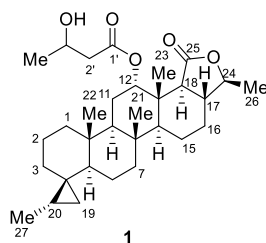

**Table S1.**  $^{13}\text{C}$  (150 MHz) and  $^1\text{H}$  (600 MHz) NMR data for compound **1**.

| Position | $\delta_{\text{C}}$ | $\delta_{\text{H}}$ (J, Hz)                      | $^1\text{H}$ - $^1\text{H}$ COSY | HMBC           | NOESY                                                         |
|----------|---------------------|--------------------------------------------------|----------------------------------|----------------|---------------------------------------------------------------|
| 1        | 39.9                | 1.70, m; 0.72, m                                 | 2                                |                | 9                                                             |
| 2        | 21.2                | 1.44, m; 1.44, m                                 | 1                                |                |                                                               |
| 3        | 33.2                | 1.53, td (12.6, 5.0);<br>1.24, m                 |                                  |                | $3\beta$ (1.24)-27                                            |
| 4        | 22.7                |                                                  |                                  |                |                                                               |
| 5        | 50.3                | 1.39, m                                          | 6                                |                | $7\alpha$ (0.93)                                              |
| 6        | 17.7                | 1.01, m; 1.01, m                                 | 5                                |                |                                                               |
| 7        | 40.4                | 1.69, m; 0.93, m                                 |                                  |                | $7\alpha$ -5, $15\alpha$ (1.76)                               |
| 8        | 37.6                |                                                  |                                  |                |                                                               |
| 9        | 51.4                | 1.19, m                                          | 11                               |                |                                                               |
| 10       | 38.0                |                                                  |                                  |                |                                                               |
| 11       | 21.5                | 2.03, ddd (15.0,<br>3.7, 1.5);<br>1.71, m        | 9, 12                            |                | $11\beta$ (1.71)-21, 22                                       |
| 12       | 74.8                | 5.41, dd (3.0, 2.4)                              | 11                               | 13, 14, 1'     | 23                                                            |
| 13       | 38.7                |                                                  |                                  |                |                                                               |
| 14       | 54.3                | 1.23, m                                          |                                  |                | 18                                                            |
| 15       | 20.1                | 1.76, m; 1.29, m                                 | 16                               |                | $15\beta$ (1.29)-23                                           |
| 16       | 27.7                | 1.95, m; 1.15, m                                 | 15, 17                           |                |                                                               |
| 17       | 44.9                | 1.86, dddd (13.6,<br>11.8, 9.7, 3.7)             | 16, 18, 24                       |                |                                                               |
| 18       | 52.5                | 2.34, d (13.8)                                   | 17                               | 13, 17, 25     | 14, 24                                                        |
| 19       | 13.7                | 0.57, m;<br>-0.49, dd (5.8, 4.3)                 | 20                               | 3, 5, 20, 27   | $19_{\text{cis}}$ (-0.49)-27;<br>$19_{\text{trans}}$ (0.57)-6 |
| 20       | 13.5                | 0.72, m                                          | 19, 27                           |                |                                                               |
| 21       | 16.5                | 0.82, s                                          |                                  | 7, 8, 9, 14    | 23, 27                                                        |
| 22       | 14.1                | 0.77, s                                          |                                  | 1, 5, 9, 10    | $11\beta$ , 27                                                |
| 23       | 17.2                | 1.04, s                                          |                                  | 12, 13, 14, 18 | $12$ , $15\beta$ (1.29),<br>17, 21                            |
| 24       | 80.4                | 4.03, dq (9.6, 6.1)                              | 17, 26                           |                |                                                               |
| 25       | 174.8               |                                                  |                                  |                |                                                               |
| 26       | 18.4                | 1.37, d (6.0)                                    |                                  | 17, 24         |                                                               |
| 27       | 13.3                | 1.07, d (6.3)                                    |                                  |                | $3\beta$ , $19_{\text{cis}}$ , 22                             |
| 1'       | 171.7               |                                                  |                                  |                |                                                               |
| 2'       | 43.3                | 2.49, dd (16.2,<br>3.2);<br>2.42, dd (16.1, 9.0) | 3'                               | 1', 3'         |                                                               |
| 3'       | 64.5                | 4.19, m                                          | 2', 4'                           |                |                                                               |
| 4'       | 22.5                | 1.23, d                                          | 3'                               | 2', 3'         |                                                               |

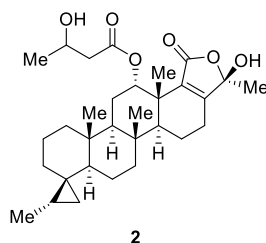

**Table S2.**  $^{13}\text{C}$  (150 MHz) and  $^1\text{H}$  (600 MHz) NMR data for compound **2**.

| Position | $\delta_{\text{C}}$ | $\delta_{\text{H}}$ (J, Hz)                        | $^1\text{H}$ - $^1\text{H}$ COSY | HMBC           | NOESY                                |
|----------|---------------------|----------------------------------------------------|----------------------------------|----------------|--------------------------------------|
| 1        | 40.0                | 1.70, m; 0.69, m                                   | 2                                |                |                                      |
| 2        | 21.2                | 1.49, m; 1.44, m                                   | 1                                | 10             |                                      |
| 3        | 33.2                | 1.53, m; 1.25, m                                   |                                  |                | $19_{\text{cis}}$ (-0.49)            |
| 4        | 22.7                |                                                    |                                  |                |                                      |
| 5        | 50.4                | 1.42, m                                            |                                  |                |                                      |
| 6        | 17.6                | 1.06, m; 1.06, m                                   |                                  |                | $19_{\text{trans}}$ (0.58)           |
| 7        | 40.2                | 1.78, m; 0.99, m                                   |                                  | 14             |                                      |
| 8        | 37.4                |                                                    |                                  |                |                                      |
| 9        | 52.0                | 1.22, m                                            | 11                               |                | 14                                   |
| 10       | 38.0                |                                                    |                                  |                |                                      |
| 11       | 21.5                | 2.05, m; 1.73, m                                   | 9, 12                            |                |                                      |
| 12       | 75.0                | 5.70, dd (3.6, 2.2)                                | 11                               | 14             | 23                                   |
| 13       | 38.9                |                                                    |                                  |                |                                      |
| 14       | 52.0                | 1.49, m                                            |                                  | 16             | 9                                    |
| 15       | 16.6                | 1.92, m; 1.49, m                                   | 16                               |                | $15\alpha$ (1.92)– $16\alpha$ (2.28) |
| 16       | 23.4                | 2.35, m; 2.28, m                                   | 15                               |                | $16\alpha$ – $15\alpha$ , 26         |
| 17       | 162.9               |                                                    |                                  |                |                                      |
| 18       | 133.7               |                                                    |                                  |                |                                      |
| 19       | 13.7                | 0.58, ddd (8.9, 4.4, 2.0);<br>-0.49, dd (5.9, 4.3) | 20                               | 3, 5, 27       | 3, 6, 27                             |
| 20       | 13.5                | 0.69, m                                            | 19, 27                           |                | 22                                   |
| 21       | 17.3                | 0.90, s                                            |                                  | 7, 8, 9, 14    | 22, 23                               |
| 22       | 14.0                | 0.80, s                                            |                                  | 1, 9, 10       | 20, 21, 27                           |
| 23       | 20.7                | 1.22, s                                            |                                  | 12, 13, 14, 18 | 12, 21                               |
| 24       | 104.4               |                                                    |                                  |                |                                      |
| 25       | 168.9               |                                                    |                                  |                |                                      |
| 26       | 22.7                | 1.56, s                                            |                                  | 17, 24         |                                      |
| 27       | 13.3                | 1.09, d (6.3)                                      | 20                               | 4, 20          | 19, 22                               |
| 1'       | 169.1               |                                                    |                                  |                |                                      |
| 2'       | 44.1                | 2.56, dd (16.2, 3.0);<br>2.39, m                   | 3'                               | 1', 3'         |                                      |
| 3'       | 65.3                | 4.12, m                                            | 2', 4'                           | 1'             |                                      |
| 4'       | 22.7                | 1.23, d (6.4)                                      | 3'                               | 2', 3'         |                                      |

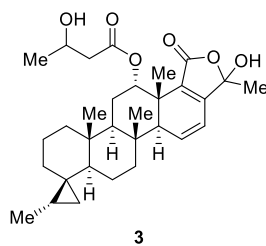

**Table S3.**  $^{13}\text{C}$  (150 MHz) and  $^1\text{H}$  (600 MHz) NMR data for compound **3**.

| Position | $\delta_{\text{C}}$ | $\delta_{\text{H}}$ (J, Hz)                     | $^1\text{H}$ - $^1\text{H}$ COSY | HMBC              | NOESY               |
|----------|---------------------|-------------------------------------------------|----------------------------------|-------------------|---------------------|
| 1        | 39.8                | 1.68, m; 0.72, m                                |                                  |                   |                     |
| 2        | 21.2                | 1.44, m; 1.44, m                                |                                  |                   |                     |
| 3        | 33.1                | 1.53, m; 1.24, m                                |                                  |                   | $3\beta$ (1.53)–27  |
| 4        | 22.8/22.7           |                                                 |                                  |                   |                     |
| 5        | 50.4/50.3           | 1.43, m                                         | 6                                |                   | 9                   |
| 6        | 17.3                | 1.08, m; 1.01, m                                | 5                                |                   |                     |
| 7        | 39.5/39.4           | 1.86, m; 1.00, m                                |                                  | 5                 | $7\alpha$ (1.00)–14 |
| 8        | 36.9                |                                                 |                                  |                   |                     |
| 9        | 50.7/50.6           | 1.26, m                                         | 11                               |                   | 5, 14               |
| 10       | 37.9/37.8           |                                                 |                                  |                   |                     |
| 11       | 21.5                | 2.12, m; 1.66, m                                | 9, 12                            |                   | $11\beta$ (1.67)–23 |
| 12       | 73.2/73.1           | 5.55/5.50, dd (3.0, 2.4)                        | 11                               | 1'                | 23                  |
| 13       | 40.2/40.1           |                                                 |                                  |                   |                     |
| 14       | 54.1/54.0           | 2.69/2.62, t (3.0)                              | 15                               | 8, 13, 15, 16, 18 | $7\alpha$ , 9       |
| 15       | 138.8               | 6.382, dt (10.0, 2.0)/<br>6.379, dt (10.0, 2.0) | 14, 16                           | 17                |                     |
| 16       | 118.6/118.4         | 6.29, dd (24.9, 3.2)/<br>6.25, dd (24.9, 3.2)   | 15                               | 17, 18, 24        |                     |
| 17       | 157.7/156.8         |                                                 |                                  |                   |                     |
| 18       | 130.8/130.7         |                                                 |                                  |                   |                     |
| 19       | 13.7                | 0.59, dd (8.8, 4.4);<br>-0.48, t (5.2)          | 20                               | 3, 4, 5           | 27                  |
| 20       | 13.5                | 0.72, m                                         | 19, 27                           |                   |                     |
| 21       | 18.8/18.7           | 1.01, s                                         |                                  | 7, 8, 14          | 22                  |
| 22       | 13.9                | 0.795/0.792, s                                  |                                  | 1, 5, 10          | 21, 27              |
| 23       | 17.3/17.1           | 1.06, s                                         |                                  | 12, 13, 14, 18    | $11\beta$ , 12      |
| 24       | 103.7/103.5         |                                                 |                                  |                   |                     |
| 25       | 169.0/168.4         |                                                 |                                  |                   |                     |
| 26       | 24.7/23.6           | 1.65/1.62, s                                    |                                  | 17, 24            |                     |
| 27       | 13.3                | 1.09/1.08, d (6.2)                              | 20                               | 4, 20             | $3\beta$ , 19, 22   |
| 1'       | 171.6/170.8         |                                                 |                                  |                   |                     |
| 2'       | 43.7/43.5           | 2.49, dd (16.2, 3.2);<br>2.37, m                | 3'                               | 1', 3'            |                     |
| 3'       | 64.8/64.5           | 4.18/4.14, m                                    | 2', 4'                           |                   |                     |
| 4'       | 22.6/22.4           | 1.22/1.20 d (6.3)                               | 3'                               | 2', 3'            |                     |

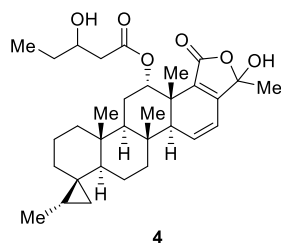

**Table S4.**  $^{13}\text{C}$  (150 MHz) and  $^1\text{H}$  (600 MHz) NMR data for compound **4**.

| Position | $\delta_{\text{C}}$ | $\delta_{\text{H}}$ (J, Hz)                   | $^1\text{H}$ - $^1\text{H}$ COSY | HMBC           | NOESY                       |
|----------|---------------------|-----------------------------------------------|----------------------------------|----------------|-----------------------------|
| 1        | 39.8                | 1.69, m; 0.73, m                              |                                  | 5              |                             |
| 2        | 21.2                | 1.45, m; 1.45, m                              |                                  |                | 20, 27                      |
| 3        | 33.1                | 1.24, m; 1.24, m                              |                                  |                |                             |
| 4        | 22.7                |                                               |                                  |                |                             |
| 5        | 50.4/50.3           | 1.43, m                                       | 6                                |                | 9                           |
| 6        | 17.3                | 1.04, m; 1.04, m                              | 5, 7                             |                |                             |
| 7        | 39.5/39.4           | 1.86, m; 1.00, m                              | 6                                | 5, 9           | $7\alpha$ (1.00)–14         |
| 8        | 36.9                |                                               |                                  |                |                             |
| 9        | 50.7/50.6           | 1.28/1.25, m                                  |                                  |                | 5, 14                       |
| 10       | 37.9                |                                               |                                  |                |                             |
| 11       | 21.5                | 2.13, m; 1.67, m                              | 9, 12                            | 10, 12         | $11\beta$ (1.67)–21, 22, 23 |
| 12       | 73.2/73.1           | 5.56/5.50, dd (3.0, 2.4)                      | 11                               | 14, 1'         | 23                          |
| 13       | 40.2/40.1           |                                               |                                  |                |                             |
| 14       | 54.1/54.0           | 2.69/2.62, t (3.0)                            | 15                               | 15, 16         | $7\alpha$ , 9               |
| 15       | 138.9/138.8         | 6.39, dt (10.0, 2.0)/<br>6.38, dt (10.0, 2.0) | 14, 16                           | 14, 17         |                             |
| 16       | 118.5/118.4         | 6.28, dd (24.8, 3.1)/<br>6.25, dd (24.8, 3.1) |                                  | 14, 17, 18     |                             |
| 17       | 157.6/156.7         |                                               |                                  |                |                             |
| 18       | 130.9/130.8         |                                               |                                  |                |                             |
| 19       | 13.7                | 0.52, dd (8.8, 4.4);<br>-0.54, t (5.1)        | 20                               | 3, 5           | 3                           |
| 20       | 13.5                | 0.70, m                                       | 19, 27                           |                | 2                           |
| 21       | 18.8/18.7           | 1.01, s                                       |                                  | 7, 8, 9, 14    | $11\beta$ , 22              |
| 22       | 13.9                | 0.799/0.792, s                                |                                  | 5              | $11\beta$ , 21, 27          |
| 23       | 17.3/17.1           | 1.008/1.002, s                                |                                  | 12, 13, 14, 18 | $11\beta$ , 12              |
| 24       | 103.6/103.4         |                                               |                                  |                |                             |
| 25       | 169.0/168.4         |                                               |                                  |                |                             |
| 26       | 24.7/23.5           | 1.66/1.63, s                                  |                                  | 17, 24         |                             |
| 27       | 13.5/13.3           | 1.08/1.07, d (6.1)                            | 20                               | 4              | 2, 22                       |
| 1'       | 171.7/170.9         |                                               |                                  |                |                             |
| 2'       | 41.9/41.8           | 2.51, dd (16.0, 3.0);<br>2.35, m              | 3'                               | 1', 3'         |                             |
| 3'       | 69.9/69.6           | 3.90/3.86, m                                  | 2', 4'                           |                |                             |
| 4'       | 29.5/29.4           | 1.50, m                                       | 3', 5'                           | 3'             |                             |
| 5'       | 10.1                | 0.95, t (7.4)                                 | 4'                               | 3'             |                             |

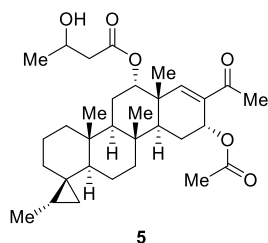

**Table S5.**  $^{13}\text{C}$  (150 MHz) and  $^1\text{H}$  (600 MHz) NMR data for compound **5**.

| Position              | $\delta_{\text{C}}$ | $\delta_{\text{H}}$ (J, Hz)            | $^1\text{H}$ - $^1\text{H}$ COSY | HMBC                                 | NOESY                                                   |
|-----------------------|---------------------|----------------------------------------|----------------------------------|--------------------------------------|---------------------------------------------------------|
| 1                     | 39.5                | 1.67, m; 0.89, m                       |                                  |                                      |                                                         |
| 2                     | 21.3                | 1.46, m; 1.46, m                       |                                  |                                      |                                                         |
| 3                     | 33.2                | 1.53, m; 1.25, m                       |                                  |                                      |                                                         |
| 4                     | 22.7                |                                        |                                  |                                      |                                                         |
| 5                     | 50.3                | 1.47, m                                | 6                                | 10                                   | $7\alpha$ (0.79)                                        |
| 6                     | 17.5                | 1.05, m; 1.05, m                       |                                  |                                      | $19_{\text{trans}}$ (0.59)                              |
| 7                     | 39.9                | 1.67, m; 0.97, m                       |                                  |                                      | $7\alpha$ -5, 9;<br>$7\beta$ (1.67)- $15\alpha$ (1.89)  |
| 8                     | 36.6                |                                        |                                  |                                      |                                                         |
| 9                     | 51.8                | 1.36, dd (13.2, 2.5)                   | 11                               |                                      | $7\alpha$ , 14                                          |
| 10                    | 38.0                |                                        |                                  |                                      |                                                         |
| 11                    | 22.5                | 1.89, m; 1.78, m                       | 9, 12                            | 10, 13                               | $11\beta$ (1.78)-23                                     |
| 12                    | 76.8                | 5.11, dd (3.0, 2.4)                    | 11                               | 9, 14                                | 23                                                      |
| 13                    | 41.4                |                                        |                                  |                                      |                                                         |
| 14                    | 44.4                | 1.76, m                                |                                  |                                      | 9                                                       |
| 15                    | 24.1                | 1.89, m; 1.61, m                       | 16                               | 13, 17                               | $15\alpha$ (1.89)- $7\beta$ ;<br>$15\beta$ (1.61)-21    |
| 16                    | 65.3                | 5.76, dd (4.3, 1.6)                    | 15                               | 14, 17, 18,<br>16-CH <sub>3</sub> CO |                                                         |
| 17                    | 135.1               |                                        |                                  |                                      |                                                         |
| 18                    | 153.2               | 6.72, s                                |                                  | 12, 14, 16, 17, 24                   |                                                         |
| 19                    | 13.7                | 0.59, dd (8.8, 4.4);<br>-0.49, t (5.1) | 20                               | 3, 5, 20                             | $19_{\text{cis}}$ (-0.49)-27;<br>$19_{\text{trans}}$ -6 |
| 20                    | 13.5                | 0.70, m                                | 19, 27                           | 5                                    |                                                         |
| 21                    | 17.1                | 0.84, s                                |                                  | 8, 9                                 | $15\beta$ , 22, 23                                      |
| 22                    | 14.0                | 0.80, s                                |                                  | 1, 5, 10                             | 21, 27                                                  |
| 23                    | 19.9                | 1.06, s                                |                                  | 12, 13, 14, 18                       | $11\beta$ , 12, 21                                      |
| 24                    | 197.7               |                                        |                                  |                                      |                                                         |
| 25                    |                     |                                        |                                  |                                      |                                                         |
| 26                    | 25.9                | 2.22, s                                |                                  | 17, 24                               |                                                         |
| 27                    | 13.3                | 1.08, d (6.3)                          | 20                               | 4, 19                                | $19_{\text{cis}}$ , 22                                  |
| 16-CH <sub>3</sub> CO | 170.2               |                                        |                                  |                                      |                                                         |
| 16-CH <sub>3</sub> CO | 21.3                | 2.02, s                                |                                  | 16-CH <sub>3</sub> CO                |                                                         |
| 1'                    | 172.0               |                                        |                                  |                                      |                                                         |
| 2'                    | 43.9                | 2.53, dd (16.0, 3.4);<br>2.39, m       | 3'                               | 1', 3'                               |                                                         |
| 3'                    | 64.6                | 4.19, m                                | 2', 4'                           | 1'                                   |                                                         |
| 4'                    | 22.9                | 1.25, d                                | 3'                               | 2', 3'                               |                                                         |



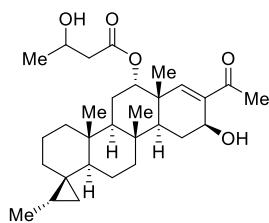

6

**Table S6.**  $^{13}\text{C}$  (150 MHz) and  $^1\text{H}$  (600 MHz) NMR data for compound **6**.

| Position | $\delta_{\text{C}}$ | $\delta_{\text{H}}$ (J, Hz)                      | $^1\text{H}$ - $^1\text{H}$ COSY | HMBC            | NOESY                                                  |
|----------|---------------------|--------------------------------------------------|----------------------------------|-----------------|--------------------------------------------------------|
| 1        | 39.9                | 1.68, m; 0.77, m                                 | 2                                | 3, 5            |                                                        |
| 2        | 21.3                | 1.47, m; 1.47, m                                 | 1                                |                 |                                                        |
| 3        | 33.2                | 1.55, m; 1.26, m                                 |                                  |                 | $3\beta$ (1.26)–<br>$19_{\text{cis}}$ (-0.49)          |
| 4        | 22.7                |                                                  |                                  |                 |                                                        |
| 5        | 50.4                | 1.44, m                                          |                                  | 4, 10, 22       | $7\alpha$ (0.95)                                       |
| 6        | 17.6                | 1.08, m; 1.08, m                                 |                                  | 5, 7            | $19_{\text{trans}}$ (0.61), 20                         |
| 7        | 39.6                | 1.79, m; 0.95, m                                 |                                  |                 | $7\alpha$ –5;<br>$7\beta$ (1.79)– $15\alpha$<br>(2.14) |
| 8        | 37.0                |                                                  |                                  |                 |                                                        |
| 9        | 51.5                | 1.28, d (6.3)                                    |                                  |                 | 14                                                     |
| 10       | 38.0                |                                                  |                                  |                 |                                                        |
| 11       | 22.4                | 1.87, m; 1.78, m                                 | 12                               | 12, 13          | $11\beta$ (1.87)–21                                    |
| 12       | 77.1                | 5.09, dd (3.0, 2.4)                              | 11                               | 1'              | 23                                                     |
| 13       | 41.6                |                                                  |                                  |                 |                                                        |
| 14       | 47.6                | 1.49, m                                          |                                  | 18              | 9                                                      |
| 15       | 25.7                | 2.14, m; 1.48, m                                 | 16                               | 13, 14, 16, 17  | $15\alpha$ – $7\beta$ ;<br>$15\beta$ (1.48)–21         |
| 16       | 68.1                | 4.62, dd (9.6, 5.1)                              | 15                               | 15              |                                                        |
| 17       | 139.1               |                                                  |                                  |                 |                                                        |
| 18       | 152.0               | 6.62, s                                          |                                  | 14, 16, 17, 23  |                                                        |
| 19       | 13.8                | 0.61, dd (8.8, 4.4);<br>-0.47, dd (5.9, 4.4)     | 20                               | 3, 4, 5, 20, 27 | 6, $19_{\text{cis}}$ – $3\beta$ , 27                   |
| 20       | 13.5                | 0.73, m                                          | 19, 27                           |                 | 6                                                      |
| 21       | 17.0                | 0.91, s                                          |                                  | 8, 9, 14        | $11\beta$ , $15\beta$ , 22, 23                         |
| 22       | 14.0                | 0.81, s                                          |                                  | 1, 5            | 21                                                     |
| 23       | 21.3                | 1.21, s                                          |                                  | 12, 18          | 12, 21                                                 |
| 24       | 202.2               |                                                  |                                  |                 |                                                        |
| 25       |                     |                                                  |                                  |                 |                                                        |
| 26       | 25.8                | 2.28, s                                          |                                  | 17, 18, 24      |                                                        |
| 27       | 13.3                | 1.11, d (6.2)                                    | 20                               |                 | $19_{\text{cis}}$                                      |
| 1'       | 172.3               |                                                  |                                  |                 |                                                        |
| 2'       | 43.5                | 2.49, dd (16.2,<br>3.7);<br>2.44, dd (16.1, 8.6) | 3'                               | 1', 3'          |                                                        |
| 3'       | 64.6                | 4.15, m                                          | 2', 4'                           | 1'              |                                                        |
| 4'       | 22.8                | 1.26, d                                          | 3'                               | 2', 3'          |                                                        |

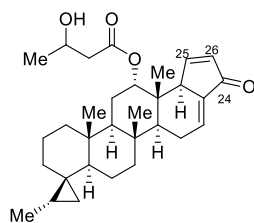

7

**Table S7.**  $^{13}\text{C}$  (150 MHz) and  $^1\text{H}$  (600 MHz) NMR data for compound **7**.

| Position | $\delta_{\text{C}}$ | $\delta_{\text{H}}$ (J, Hz)                      | $^1\text{H}$ - $^1\text{H}$ COSY | HMBC           | NOESY                          |
|----------|---------------------|--------------------------------------------------|----------------------------------|----------------|--------------------------------|
| 1        | 39.8                | 1.70, m; 0.80, m                                 | 2                                |                |                                |
| 2        | 21.1                | 1.47, m; 1.47, m                                 | 1                                |                |                                |
| 3        | 33.1                | 1.56, m; 1.26, m                                 |                                  |                | $3\beta$ (1.25)–27             |
| 4        | 22.6                |                                                  |                                  |                |                                |
| 5        | 50.1                | 1.46, m                                          |                                  |                | 9                              |
| 6        | 17.4                | 1.03, m; 1.03, m                                 |                                  |                |                                |
| 7        | 40.0                | 1.66, m; 1.04, m                                 |                                  | 5              | $7\alpha$ (0.96)–9             |
| 8        | 37.8                |                                                  |                                  |                |                                |
| 9        | 51.2                | 1.39, m                                          | 11                               |                | 5, $7\alpha$ , 14              |
| 10       | 37.6                |                                                  |                                  |                |                                |
| 11       | 22.9                | 1.86, m; 1.77, m                                 | 9, 12                            |                | $11\beta$ (1.78)–21, 23        |
| 12       | 74.7                | 5.20, dd (3.0, 2.8)                              | 11                               | 1'             | 23                             |
| 13       | 38.6                |                                                  |                                  |                |                                |
| 14       | 50.3                | 1.77, m                                          | 15                               |                | 9, 18                          |
| 15       | 24.5                | 2.42, m; 2.11, m                                 | 14, 16                           |                | $15\beta$ (2.11)–21            |
| 16       | 130.4               | 6.64, d (4.3)                                    | 15                               |                |                                |
| 17       | 136.4               |                                                  |                                  |                |                                |
| 18       | 49.3                | 3.35, d (2.6)                                    |                                  | 13, 17, 23, 25 | 14                             |
| 19       | 13.6                | 0.59, m;<br>-0.49, t (5.2)                       | 20                               | 3, 20          | $19_{\text{trans}}$ (0.57)–27  |
| 20       | 13.4                | 0.70, m                                          | 19, 27                           |                | 22                             |
| 21       | 15.8                | 0.89, s                                          |                                  | 7              | $11\beta$ , $15\beta$ , 23     |
| 22       | 14.2                | 0.81, s                                          |                                  | 1, 9           | 20                             |
| 23       | 14.5                | 0.61, s                                          |                                  | 12, 13         | $11\beta$ , 12, 21             |
| 24       | 195.9               |                                                  |                                  |                |                                |
| 25       | 157.5               | 7.38, dd (6.4, 2.0)                              | 18, 26                           | 17, 18, 24     |                                |
| 26       | 137.4               | 6.34, dd (6.1, 2.4)                              | 25                               | 17, 24, 25     |                                |
| 27       | 13.2                | 1.08, d (6.2)                                    | 20                               | 4, 19, 20      | $3\beta$ , $19_{\text{trans}}$ |
| 1'       | 172.1               |                                                  |                                  |                |                                |
| 2'       | 43.3                | 2.57, dd (16.3,<br>3.5);<br>2.50, dd (16.3, 8.8) | 3'                               | 3'             |                                |
| 3'       | 64.5                | 4.23, m                                          | 2', 4'                           |                |                                |
| 4'       | 22.6                | 1.27, d (6.3)                                    | 3'                               | 2'             |                                |

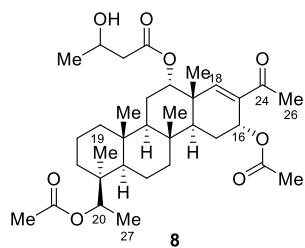

**Table S8.**  $^{13}\text{C}$  (150 MHz) and  $^1\text{H}$  (600 MHz) NMR data for compound **8**.

| Position              | $\delta_{\text{C}}$ | $\delta_{\text{H}}$ (J, Hz)                      | $^1\text{H}$ - $^1\text{H}$ COSY | HMBC                          | NOESY                                       |
|-----------------------|---------------------|--------------------------------------------------|----------------------------------|-------------------------------|---------------------------------------------|
| 1                     | 40.5                | 1.64, m;<br>0.74, td (12.5, 4.0)                 | 2                                | 10                            | 1 $\alpha$ (0.74)–9;<br>1 $\beta$ (1.64)–22 |
| 2                     | 18.0                | 1.47, m; 1.39, m                                 | 1, 3                             |                               | 2 $\beta$ (1.47)–20, 22                     |
| 3                     | 39.1                | 1.67, m; 1.02, m                                 | 2                                |                               | 3 $\beta$ (1.67)–27                         |
| 4                     | 39.4                |                                                  |                                  |                               |                                             |
| 5                     | 58.9                | 1.03, m                                          | 6                                |                               | 9                                           |
| 6                     | 19.9                | 1.75, m; 1.41, m                                 | 5, 7                             |                               |                                             |
| 7                     | 41.8                | 1.70, m; 0.79, m                                 | 6                                |                               |                                             |
| 8                     | 36.9                |                                                  |                                  |                               |                                             |
| 9                     | 54.1                | 1.29, m                                          | 11                               |                               | 1 $\alpha$ , 5, 14                          |
| 10                    | 37.3                |                                                  |                                  |                               |                                             |
| 11                    | 22.4                | 1.83–1.74, m; 2H                                 | 9, 12                            |                               |                                             |
| 12                    | 76.8                | 5.11, dd (3.0, 2.4)                              | 11                               | 9, 14                         | 23                                          |
| 13                    | 41.3                |                                                  |                                  |                               |                                             |
| 14                    | 44.1                | 1.72, m                                          | 15                               |                               | 9                                           |
| 15                    | 24.1                | 1.86, d (14.6);<br>1.60, m                       | 14, 16                           | 13, 16                        |                                             |
| 16                    | 65.2                | 5.74, dd (4.3, 1.6)                              | 15                               | 14, 18, 16-CH <sub>3</sub> CO | 26                                          |
| 17                    | 135.1               |                                                  |                                  |                               |                                             |
| 18                    | 153.2               | 6.70, s                                          |                                  | 12                            |                                             |
| 19                    | 23.3                | 0.99, s                                          |                                  | 5, 20                         |                                             |
| 20                    | 73.2                | 5.35, q (6.3)                                    | 27                               | 20-CH <sub>3</sub> CO         | 2 $\beta$ , 22                              |
| 21                    | 16.9                | 0.82, s                                          |                                  | 8, 9, 14                      |                                             |
| 22                    | 16.6                | 0.87, s                                          |                                  | 1, 5, 9                       | 1 $\beta$ , 2 $\beta$                       |
| 23                    | 19.9                | 1.05, s                                          |                                  | 12, 13, 18                    | 12                                          |
| 24                    | 197.8               |                                                  |                                  |                               |                                             |
| 25                    |                     |                                                  |                                  |                               |                                             |
| 26                    | 25.9                | 2.21, s                                          |                                  | 17, 24                        | 16                                          |
| 27                    | 15.9                | 1.09, d (6.3)                                    | 20                               | 4, 20                         | 3 $\beta$                                   |
| 20-CH <sub>3</sub> CO | 170.6               |                                                  |                                  |                               |                                             |
| 20-CH <sub>3</sub> CO | 22.0                | 2.03, s                                          |                                  | 20, 20-CH <sub>3</sub> CO     |                                             |
| 16-CH <sub>3</sub> CO | 170.2               |                                                  |                                  |                               |                                             |
| 16-CH <sub>3</sub> CO | 21.4                | 2.03, s                                          |                                  | 16                            |                                             |
| 1'                    | 172.0               |                                                  |                                  |                               |                                             |
| 2'                    | 43.8                | 2.52, dd (16.0,<br>3.4);<br>2.46, dd (16.0, 8.9) | 3'                               | 1', 3'                        |                                             |
| 3'                    | 64.5                | 4.18, m                                          | 2', 4'                           |                               |                                             |
| 4'                    | 22.9                | 1.25, d (6.3)                                    | 3'                               | 2', 3'                        |                                             |

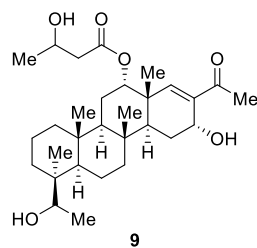

**Table S9.**  $^{13}\text{C}$  (150 MHz) and  $^1\text{H}$  (600 MHz) NMR data for compound **9**.

| Position | $\delta_{\text{C}}$ | $\delta_{\text{H}}$ (J, Hz)                   | $^1\text{H}$ - $^1\text{H}$ COSY | HMBC           | NOESY               |
|----------|---------------------|-----------------------------------------------|----------------------------------|----------------|---------------------|
| 1        | 40.8                | 1.63, m; 0.74, m                              | 2                                |                |                     |
| 2        | 18.0                | 1.46, m; 1.36, m                              | 1, 3                             |                | $2\beta$ (1.46)–20  |
| 3        | 39.5                | 1.60, m; 1.04, m                              | 2                                |                | $3\beta$ (1.60)–27  |
| 4        | 40.6                |                                               |                                  |                |                     |
| 5        | 59.3                | 1.02, m                                       |                                  |                | 9                   |
| 6        | 22.5                | 1.82, m; 1.82, m                              |                                  |                |                     |
| 7        | 41.8                | 1.82, m; 1.01, m                              |                                  |                |                     |
| 8        | 37.1                |                                               |                                  |                |                     |
| 9        | 54.1                | 1.37, m                                       | 11                               | 8, 11          | 5, 14               |
| 10       | 37.4                |                                               |                                  |                |                     |
| 11       | 21.0                | 1.81, m; 1.77, m                              | 9, 12                            |                | $11\beta$ (1.82)–22 |
| 12       | 77.1                | 5.11, dd (3.0, 2.4)                           | 11                               | 9, 14          | 23                  |
| 13       | 41.6                |                                               |                                  |                |                     |
| 14       | 43.7                | 1.86, d (13.2)                                |                                  |                | 9                   |
| 15       | 25.3                | 1.86, m; 1.60, m                              | 16                               |                |                     |
| 16       | 63.3                | 4.55, d (3.8)                                 | 15                               | 14, 17, 18     |                     |
| 17       | 138.4               |                                               |                                  |                |                     |
| 18       | 151.8               | 6.59, s                                       |                                  | 12, 14, 16, 24 |                     |
| 19       | 22.0                | 0.86, s                                       |                                  | 5, 20          |                     |
| 20       | 70.1                | 4.32, q (6.3)                                 | 27                               | 19             | $2\beta$ , 22       |
| 21       | 16.8                | 0.91, s                                       |                                  | 7, 8, 9        |                     |
| 22       | 16.5                | 0.98, s                                       |                                  | 1, 5, 9, 10    | $11\beta$ , 20      |
| 23       | 19.9                | 1.08, s                                       |                                  | 12, 18         | 12                  |
| 24       | 201.5               |                                               |                                  |                |                     |
| 25       |                     |                                               |                                  |                |                     |
| 26       | 25.6                | 2.25, s                                       |                                  | 17, 24         |                     |
| 27       | 19.9                | 1.08, d (6.2)                                 | 20                               | 4, 20          | $3\beta$            |
| 1'       | 172.2               |                                               |                                  |                |                     |
| 2'       | 43.9                | 2.49, dd (16.1, 3.2);<br>2.41, dd (16.0, 9.2) | 3'                               | 1', 3'         |                     |
| 3'       | 64.6                | 4.15, m                                       | 2', 4'                           |                |                     |
| 4'       | 22.9                | 1.22, d (6.3)                                 | 3'                               | 2', 3'         |                     |

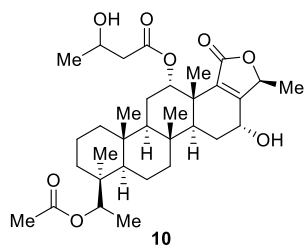

**Table S10.**  $^{13}\text{C}$  (150 MHz) and  $^1\text{H}$  (600 MHz) NMR data for compound **10**.

| Position                  | $\delta_{\text{C}}$ | $\delta_{\text{H}}$ (J, Hz)                      | $^1\text{H}$ - $^1\text{H}$ COSY | HMBC                                | NOESY                                       |
|---------------------------|---------------------|--------------------------------------------------|----------------------------------|-------------------------------------|---------------------------------------------|
| 1                         | 40.5                | 1.66, m; 0.64, m                                 | 2                                | 10                                  | 1 $\alpha$ (0.64)–9;<br>1 $\beta$ (1.66)–22 |
| 2                         | 17.9                | 1.45, m; 1.36, m                                 | 1, 3                             |                                     |                                             |
| 3                         | 39.1                | 1.66, m; 1.00, m                                 | 2                                | 4                                   | 3 $\beta$ (1.66)–27                         |
| 4                         | 39.4                |                                                  |                                  |                                     |                                             |
| 5                         | 59.0                | 0.98, m                                          |                                  |                                     | 9                                           |
| 6                         | 20.1                | 1.76, m; 1.42, m                                 |                                  | 5                                   |                                             |
| 7                         | 42.4                | 1.78, m; 0.94, m                                 |                                  | 8, 9                                |                                             |
| 8                         | 37.2                |                                                  |                                  |                                     |                                             |
| 9                         | 53.9                | 1.20, m                                          |                                  |                                     | 1 $\alpha$ , 5, 14                          |
| 10                        | 37.2                |                                                  |                                  |                                     |                                             |
| 11                        | 21.2                | 2.05, m; 1.71, m                                 | 12                               |                                     | 11 $\beta$ (1.71)–22, 23                    |
| 12                        | 74.4                | 5.61, dd (3.0, 2.4)                              | 11                               | 9                                   | 23                                          |
| 13                        | 39.1                |                                                  |                                  |                                     |                                             |
| 14                        | 45.9                | 1.76, m                                          |                                  |                                     | 9                                           |
| 15                        | 27.8                | 1.91, d (13.8);<br>1.84, td (14.2,<br>13.6, 4.7) | 16                               | 13, 16, 17                          | 15 $\beta$ (1.84)–21, 23                    |
| 16                        | 61.6                | 4.44, dd (4.7, 1.4)                              | 15                               | 14, 17, 18                          | 26                                          |
| 17                        | 162.1               |                                                  |                                  |                                     |                                             |
| 18                        | 135.6               |                                                  |                                  |                                     |                                             |
| 19                        | 23.3                | 0.96, s                                          |                                  | 3, 5                                |                                             |
| 20                        | 73.3                | 5.35, q (6.3)                                    | 27                               | 3, 5, 19, 20-<br>CH <sub>3</sub> CO | 22                                          |
| 21                        | 16.8                | 0.87, s                                          |                                  | 7, 8, 9, 14                         | 15 $\beta$ , 23                             |
| 22                        | 16.6                | 0.87, s                                          |                                  | 1, 5, 9, 10                         | 1 $\beta$ , 11 $\beta$ , 20                 |
| 23                        | 19.8                | 1.13, s                                          |                                  | 12, 14, 18                          | 11 $\beta$ , 12, 15 $\beta$ , 21            |
| 24                        | 77.0                | 5.07, q (6.8)                                    | 26                               | 17, 18, 25                          |                                             |
| 25                        | 170.9               |                                                  |                                  |                                     |                                             |
| 26                        | 18.2                | 1.39, d (6.8)                                    | 24                               | 17                                  | 16                                          |
| 27                        | 16.0                | 1.07, d (6.3)                                    | 20                               | 20                                  | 3 $\beta$                                   |
| 20-<br>CH <sub>3</sub> CO | 170.5               |                                                  |                                  |                                     |                                             |
| 20-<br>CH <sub>3</sub> CO | 22.0                | 2.03, s                                          |                                  | 20-CH <sub>3</sub> CO               |                                             |
| 1'                        | 171.5               |                                                  |                                  |                                     |                                             |
| 2'                        | 43.5                | 2.38, dd (16.0,<br>3.4);<br>2.33, dd (16.0, 8.7) | 3'                               | 1', 3'                              |                                             |
| 3'                        | 64.4                | 4.11, m                                          | 2', 4'                           |                                     |                                             |
| 4'                        | 22.5                | 1.18, d (6.3)                                    | 3'                               | 2'                                  |                                             |

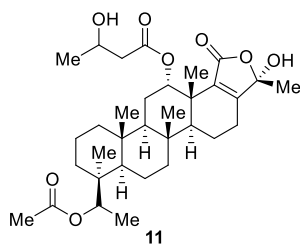

**Table S11.**  $^{13}\text{C}$  (150 MHz) and  $^1\text{H}$  (600 MHz) NMR data for compound **11**.

| Position              | $\delta_{\text{C}}$ | $\delta_{\text{H}}$ (J, Hz)   | $^1\text{H}$ - $^1\text{H}$ COSY | HMBC                         | NOESY               |
|-----------------------|---------------------|-------------------------------|----------------------------------|------------------------------|---------------------|
| 1                     | 40.7                | 1.66, m; 0.62, m              | 2                                |                              |                     |
| 2                     | 18.0                | 1.45, m; 1.36, m              | 1, 3                             |                              |                     |
| 3                     | 39.1                | 1.66, m; 1.02, m              | 2                                |                              | $3\beta$ (1.66)–27  |
| 4                     | 39.4                |                               |                                  |                              |                     |
| 5                     | 59.1                | 0.97, m                       |                                  |                              | 9                   |
| 6                     | 20.1                | 1.77, m; 1.44, m              |                                  |                              |                     |
| 7                     | 42.5                | 1.82, m; 0.93, m              |                                  |                              |                     |
| 8                     | 37.7                |                               |                                  |                              |                     |
| 9                     | 54.4                | 1.16, m                       | 11                               |                              | 5, 14               |
| 10                    | 37.3                |                               |                                  |                              |                     |
| 11                    | 21.4                | 1.96, m; 1.72, m              | 9, 12                            |                              | $11\beta$ (1.72)–22 |
| 12                    | 74.9                | 5.69, dd (3.0, 2.4)           | 11                               | 9                            | 23                  |
| 13                    | 38.8                |                               |                                  |                              |                     |
| 14                    | 51.8                | 1.47, m                       | 15                               |                              | 9                   |
| 15                    | 16.6                | 1.90, m; 1.45, m              | 14, 16                           |                              |                     |
| 16                    | 23.4                | 2.33, m; 2.28, m              | 15                               | 14, 17, 18                   | $16\beta$ (2.33)–26 |
| 17                    | 162.9               |                               |                                  |                              |                     |
| 18                    | 133.6               |                               |                                  |                              |                     |
| 19                    | 23.3                | 0.97, s                       |                                  | 4, 5, 20                     |                     |
| 20                    | 73.2                | 5.36, q (6.3)                 | 27                               | 5, 27, 20-CH <sub>3</sub> CO | 22                  |
| 21                    | 17.1                | 0.87, s                       |                                  | 7, 9, 14                     | 23                  |
| 22                    | 16.6                | 0.87, s                       |                                  | 1, 5, 9                      | $11\beta$ , 20      |
| 23                    | 20.7                | 1.21, s                       |                                  | 12, 13, 14, 18               | 12, 21              |
| 24                    | 104.4               |                               |                                  |                              |                     |
| 25                    | 169.0               |                               |                                  |                              |                     |
| 26                    | 22.7                | 1.56, s                       |                                  | 17, 24                       | $16\beta$           |
| 27                    | 16.0                | 1.08, d (6.3)                 | 20                               | 4, 20                        | $3\beta$            |
| 20-CH <sub>3</sub> CO | 170.5               |                               |                                  |                              |                     |
| 20-CH <sub>3</sub> CO | 22.0                | 2.04, s                       |                                  | 20-CH <sub>3</sub> CO        |                     |
| 1'                    | 169.1               |                               |                                  |                              |                     |
| 2'                    | 44.1                | 2.55, dd (16.1, 3.0); 2.38, m | 3'                               | 1', 3'                       |                     |
| 3'                    | 65.3                | 4.11, m                       | 2', 4'                           |                              |                     |
| 4'                    | 22.8                | 1.23, d (6.3)                 | 3'                               | 2', 3'                       |                     |

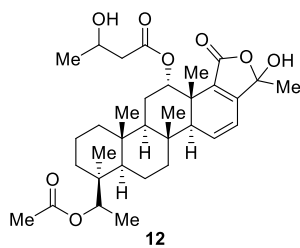

**Table S12.**  $^{13}\text{C}$  (150 MHz) and  $^1\text{H}$  (600 MHz) NMR data for compound **12**.

| Position              | $\delta_{\text{C}}$ | $\delta_{\text{H}}$ (J, Hz)                   | $^1\text{H}$ - $^1\text{H}$ COSY | HMBC                                   | NOESY                                      |
|-----------------------|---------------------|-----------------------------------------------|----------------------------------|----------------------------------------|--------------------------------------------|
| 1                     | 40.5                | 1.67, m; 0.67, m                              | 2                                | 9                                      |                                            |
| 2                     | 18.0                | 1.47, m; 1.38, m                              | 1, 3                             | 10                                     | $2\beta$ (1.38)–20                         |
| 3                     | 39.1                | 1.67, m; 1.03, m                              | 2                                |                                        | $3\beta$ (1.67)–27                         |
| 4                     | 39.4                |                                               |                                  |                                        |                                            |
| 5                     | 59.1                | 0.99, m                                       |                                  |                                        |                                            |
| 6                     | 19.78               | 1.79, m; 1.47, m                              |                                  |                                        | $6\alpha$ (1.79)–19;<br>$6\beta$ (1.47)–22 |
| 7                     | 41.8                | 1.91, m; 0.93, m                              |                                  | 5, 9                                   |                                            |
| 8                     | 37.3/37.2           |                                               |                                  |                                        |                                            |
| 9                     | 53.1/53.0           | 1.22, m                                       | 11                               |                                        | 14                                         |
| 10                    | 37.2                |                                               |                                  |                                        |                                            |
| 11                    | 21.5/21.4           | 2.07, m; 1.66, m                              | 9, 12                            |                                        | $11\beta$ (1.66)–22, 23                    |
| 12                    | 73.2/73.0           | 5.56/5.51, dd (3.0, 1.8)                      | 11                               |                                        | 23                                         |
| 13                    | 40.2/40.0           |                                               |                                  |                                        |                                            |
| 14                    | 54.0/53.9           | 2.66/2.22, t (2.9)                            | 15                               | 15                                     | 9                                          |
| 15                    | 138.9/138.7         | 6.38, m                                       | 14, 16                           | 13, 14, 16, 17, 18                     |                                            |
| 16                    | 118.4               | 6.28, dd (22.5, 3.2)/<br>6.26, dd (22.5, 3.2) | 15                               | 14                                     |                                            |
| 17                    | 157.3               |                                               |                                  |                                        |                                            |
| 18                    | 131.0               |                                               |                                  |                                        |                                            |
| 19                    | 23.4                | 0.98/0.97, s                                  |                                  | 3, 5, 20                               | $6\alpha$                                  |
| 20                    | 73.3                | 5.36, q (6.2)                                 | 27                               | 4, 5, 19, 27,<br>20-CH <sub>3</sub> CO | $2\beta$ , 22                              |
| 21                    | 18.7/18.6           | 0.99, s                                       |                                  | 7, 8, 14                               |                                            |
| 22                    | 16.5                | 0.877/0.873, s                                |                                  | 5, 9, 10                               | $6\beta$ , $11\beta$ , 20                  |
| 23                    | 17.3/17.0           | 1.07/1.06, s                                  |                                  | 12, 13, 14, 18                         | $11\beta$ , 12                             |
| 24                    | 103.32              |                                               |                                  |                                        |                                            |
| 25                    | 171.5               |                                               |                                  |                                        |                                            |
| 26                    | 24.8/23.6           | 1.67/1.63, s                                  |                                  | 17, 24                                 |                                            |
| 27                    | 16.0                | 1.10/1.09, d (6.3)                            | 20                               | 5, 20                                  | $3\beta$                                   |
| 20-CH <sub>3</sub> CO | 170.4               |                                               |                                  |                                        |                                            |
| 20-CH <sub>3</sub> CO | 22.0                | 2.05, s                                       |                                  | 20-CH <sub>3</sub> CO                  |                                            |
| 1'                    | 170.8               |                                               |                                  |                                        |                                            |
| 2'                    | 43.7/43.5           | 2.49, dd (16.9, 2.9)/<br>2.39, m;<br>2.39, m  | 3'                               | 1', 3'                                 |                                            |
| 3'                    | 64.7/64.4           | 4.19/4.16, m                                  | 2', 4'                           |                                        |                                            |
| 4'                    | 22.6/22.5           | 1.23/1.21, d (6.3)                            | 3'                               | 2'                                     |                                            |

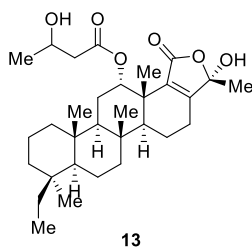

**Table S13.**  $^{13}\text{C}$  (150 MHz) and  $^1\text{H}$  (600 MHz) NMR data for compound **13**.

| Position | $\delta_{\text{C}}$ | $\delta_{\text{H}}$ (J, Hz)      | $^1\text{H}$ - $^1\text{H}$ COSY | HMBC          | NOESY                                      |
|----------|---------------------|----------------------------------|----------------------------------|---------------|--------------------------------------------|
| 1        | 40.4                | 1.51, m; 0.49, m                 | 2                                |               |                                            |
| 2        | 18.3                | 1.40, m; 1.26, m                 | 1                                |               |                                            |
| 3        | 36.7                | 1.58, m; 0.75, m                 |                                  | 5             |                                            |
| 4        | 36.3                |                                  |                                  |               |                                            |
| 5        | 59.0                | 0.80, m                          |                                  |               | 9                                          |
| 6        | 18.2                | 1.51, m; 1.40, m                 | 7                                |               | $6\alpha$ (1.51)–19;<br>$6\beta$ (1.40)–22 |
| 7        | 41.9                | 1.77, m; 0.94, m                 | 6                                |               |                                            |
| 8        | 37.7                |                                  |                                  |               |                                            |
| 9        | 54.0                | 1.10, m                          | 11                               |               | 5, 14                                      |
| 10       | 37.2                |                                  |                                  |               |                                            |
| 11       | 21.4                | 1.88, m; 1.63, m                 | 9, 12                            |               |                                            |
| 12       | 75.0                | 5.62, dd (3.0, 2.4)              | 11                               | 9, 11, 14, 1' | 23                                         |
| 13       | 38.9                |                                  |                                  |               |                                            |
| 14       | 51.9                | 1.42, m                          |                                  |               | 9                                          |
| 15       | 16.7                | 1.86, m; 1.42, m                 | 16                               | 17            |                                            |
| 16       | 23.4                | 2.33, m; 2.12, m                 | 15                               | 17, 18        | $16\beta$ (2.33)–26                        |
| 17       | 163.0               |                                  |                                  |               |                                            |
| 18       | 133.7               |                                  |                                  |               |                                            |
| 19       | 28.6                | 0.73, s                          |                                  | 4, 5, 20      | $6\alpha$                                  |
| 20       | 24.6                | 1.45, m; 1.09, m                 | 27                               |               | 22                                         |
| 21       | 17.4                | 0.83, s                          |                                  | 7, 8, 14      | 22, 23                                     |
| 22       | 16.9                | 0.77, s                          |                                  | 1, 5, 9, 10   | $6\beta$ , 20, 21                          |
| 23       | 20.7                | 1.13, s                          |                                  | 13, 14, 18    | 12, 21                                     |
| 24       | 104.4               |                                  |                                  |               |                                            |
| 25       | 163.0               |                                  |                                  |               |                                            |
| 26       | 22.7                | 1.48, s                          |                                  | 17, 24        | $16\beta$                                  |
| 27       | 8.8                 | 0.67, td (12.9, 4.3)             | 20                               | 4, 20         |                                            |
| 1'       | 169.1               |                                  |                                  |               |                                            |
| 2'       | 44.1                | 2.47, dd (16.1, 3.0);<br>2.31, m | 3'                               | 1'            |                                            |
| 3'       | 65.3                | 4.06, m                          | 2', 4'                           |               |                                            |
| 4'       | 22.8                | 1.16, d (6.4)                    | 3'                               | 2', 3'        |                                            |



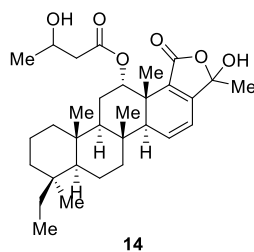

**Table S14.**  $^{13}\text{C}$  (150 MHz) and  $^1\text{H}$  (600 MHz) NMR data for compound **14**.

| Position | $\delta_{\text{C}}$ | $\delta_{\text{H}}$ (J, Hz)                   | $^1\text{H}$ - $^1\text{H}$ COSY | HMBC           | NOESY                                                      |
|----------|---------------------|-----------------------------------------------|----------------------------------|----------------|------------------------------------------------------------|
| 1        | 40.0                | 1.58, m; 0.61, m                              | 2                                |                | $1\alpha$ (0.61)–9;<br>$1\beta$ (1.57)– $11\alpha$ (2.04)  |
| 2        | 18.1                | 1.46, m; 1.35, m                              | 1, 3                             |                |                                                            |
| 3        | 36.5                | 1.65, m; 0.84, m                              | 2                                | 5              |                                                            |
| 4        | 36.2                |                                               |                                  |                |                                                            |
| 5        | 58.8                | 0.89, m                                       |                                  | 19             | 9                                                          |
| 6        | 17.7                | 1.58, m; 1.49, m                              |                                  |                | $6\alpha$ (1.58)–9, 19;<br>$6\beta$ (1.49)–21, 22          |
| 7        | 41.0                | 1.93, m; 1.02, m                              |                                  | 5, 9           |                                                            |
| 8        | 36.9                |                                               |                                  |                |                                                            |
| 9        | 52.6/52.5           | 1.22, m                                       | 11                               |                | $1\alpha$ , 5, 14                                          |
| 10       | 37.2/37.1           |                                               |                                  |                |                                                            |
| 11       | 21.3/21.2           | 2.04, m; 1.63, m                              | 9, 12                            |                | $11\alpha$ – $1\beta$ ;<br>$11\beta$ (1.65)–<br>21, 22, 23 |
| 12       | 73.0                | 5.55/5.49, dd (3.0, 1.8)                      | 11                               | 9, 14          | 23                                                         |
| 13       | 39.9                |                                               |                                  |                |                                                            |
| 14       | 53.9                | 2.68/2.62, t (3.0)                            | 15                               | 15, 16         | 9                                                          |
| 15       | 138.8/138.7         | 6.40, dt (10.0, 2.0)/<br>6.38, dt (10.0, 2.0) | 14, 16                           | 13, 14, 16, 17 |                                                            |
| 16       | 118.4/118.2         | 6.28, dd (25.0, 3.2)/<br>6.27, dd (25.0, 3.2) | 15                               | 14, 18         |                                                            |
| 17       | 157.6/156.7         |                                               |                                  |                |                                                            |
| 18       | 130.7/130.6         |                                               |                                  |                |                                                            |
| 19       | 28.5                | 0.80/0.79, s                                  |                                  | 5              | $6\alpha$                                                  |
| 20       | 24.5                | 1.52, m; 1.16, m                              | 27                               | 4, 19, 27      | 22                                                         |
| 21       | 18.9/18.8           | 1.02, s                                       |                                  | 7, 8, 14       | $6\beta$ , $11\beta$                                       |
| 22       | 16.6                | 0.839/0.834, s                                |                                  | 1, 5, 9, 10    | $6\beta$ , $11\beta$ , 20                                  |
| 23       | 17.1/16.9           | 1.05/1.04, s                                  |                                  | 12, 13, 14, 18 | $11\beta$ , 12                                             |
| 24       | 103.5/103.4         |                                               |                                  |                |                                                            |
| 25       | 168.9/168.3         |                                               |                                  |                |                                                            |
| 26       | 24.6/23.5           | 1.65/1.62, s                                  |                                  | 17, 24         |                                                            |
| 27       | 8.6                 | 0.74, t (7.5)                                 | 20                               | 4, 20          |                                                            |
| 1'       | 171.4/170.7         |                                               |                                  |                |                                                            |
| 2'       | 43.6/43.4           | 2.52, dd (16.0, 3.2);<br>2.36, m              | 3'                               | 1', 3'         |                                                            |
| 3'       | 64.7/64.4           | 4.18/4.13, m                                  | 2', 4'                           |                |                                                            |
| 4'       | 22.5/22.3           | 1.22/1.20 d (6.3)                             | 3'                               | 2', 3'         |                                                            |

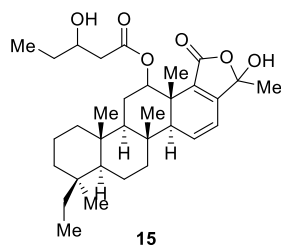

**Table S15.**  $^{13}\text{C}$  (150 MHz) and  $^1\text{H}$  (600 MHz) NMR data for compound **15**.

| Position | $\delta_{\text{C}}$ | $\delta_{\text{H}}$ (J, Hz)                   | $^1\text{H}$ - $^1\text{H}$ COSY | HMBC           | NOESY                                        |
|----------|---------------------|-----------------------------------------------|----------------------------------|----------------|----------------------------------------------|
| 1        | 40.2/40.1           | 1.58, m; 0.62, m                              | 2                                |                |                                              |
| 2        | 18.3                | 1.46, m; 1.35, m                              | 1                                |                |                                              |
| 3        | 36.7                | 1.66, m; 0.84, m                              |                                  |                |                                              |
| 4        | 36.3                |                                               |                                  |                |                                              |
| 5        | 58.9                | 0.89, m                                       |                                  |                | 9                                            |
| 6        | 17.8                | 1.57, m; 1.49, m                              |                                  |                | 6 $\alpha$ (1.57)–19;<br>6 $\beta$ (1.49)–22 |
| 7        | 41.2/41.1           | 1.93, m; 1.02, m                              |                                  | 5, 9           | 7 $\alpha$ (1.02)–14;<br>7 $\beta$ (1.93)–21 |
| 8        | 37.1/37.0           |                                               |                                  |                |                                              |
| 9        | 52.7/52.6           | 1.23, m                                       | 11                               |                | 5, 14                                        |
| 10       | 37.3/37.2           |                                               |                                  |                |                                              |
| 11       | 21.4                | 2.05, m; 1.65, m                              | 9, 12                            |                | 11 $\beta$ (1.59)–22                         |
| 12       | 73.2/73.1           | 5.55/5.49, dd (2.3, 1.8)                      |                                  | 9, 14, 1'      | 23                                           |
| 13       | 40.2/40.1           |                                               |                                  |                |                                              |
| 14       | 54.0                | 2.69/2.63, t (3.0)                            | 15                               | 15, 16         | 7 $\alpha$ , 9                               |
| 15       | 139.0               | 6.41, dt (10.0, 2.0)/<br>6.40, dt (10.0, 2.0) | 14, 16                           | 16, 17         |                                              |
| 16       | 118.4/118.3         | 6.28, dd (24.8, 3.1)/<br>6.27, dd (24.8, 3.1) | 15                               | 14, 15, 17, 18 |                                              |
| 17       | 157.7/156.7         |                                               |                                  |                |                                              |
| 18       | 130.9/130.8         |                                               |                                  |                |                                              |
| 19       | 28.7/28.6           | 0.80, s                                       |                                  | 5, 20          | 6 $\alpha$                                   |
| 20       | 24.7                | 1.53, m; 1.16, m                              | 27                               | 4, 27          | 22                                           |
| 21       | 19.1/18.9           | 1.02, s                                       |                                  | 8, 14          | 7 $\beta$                                    |
| 22       | 16.8/16.7           | 0.84, s                                       |                                  | 1, 5, 9        | 6 $\beta$ , 11 $\beta$ , 20                  |
| 23       | 17.3/17.0           | 1.06/1.05, s                                  |                                  | 12, 13, 14, 18 | 12                                           |
| 24       | 103.5/103.4         |                                               |                                  |                |                                              |
| 25       | 168.9/168.3         |                                               |                                  |                |                                              |
| 26       | 24.8/23.5           | 1.66/1.62, s                                  |                                  | 17, 24         |                                              |
| 27       | 8.8                 | 0.67, t (6.9)                                 | 20                               | 4, 20          |                                              |
| 1'       | 171.6/170.9         |                                               |                                  |                |                                              |
| 2'       | 41.9/41.8           | 2.50, dd (15.9, 2.9)/2.42, m;<br>2.41/2.35, m | 3'                               | 1', 3'         |                                              |
| 3'       | 69.9/69.7           | 3.90/3.85, m                                  | 2', 4'                           |                |                                              |
| 4'       | 29.5/29.5           | 1.51/1.25, m                                  | 3', 5'                           | 3'             |                                              |
| 5'       | 10.1                | 0.95, t (7.0)                                 | 4'                               | 3'             |                                              |

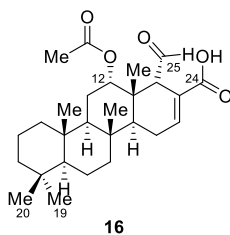

**Table S16.**  $^{13}\text{C}$  (150 MHz) and  $^1\text{H}$  (600 MHz) NMR data for compound **16**.

| Position | $\delta_{\text{C}}$ | $\delta_{\text{H}}$ (J, Hz) | $^1\text{H}$ - $^1\text{H}$ COSY | HMBC               | NOESY                   |
|----------|---------------------|-----------------------------|----------------------------------|--------------------|-------------------------|
| 1        | 39.7                | 1.50, m; 0.50, m            |                                  |                    | 1 $\alpha$ (0.50)–9     |
| 2        | 18.0                | 1.44, m; 1.25, m            |                                  |                    |                         |
| 3        | 42.0                | 1.30, m; 1.04, m            |                                  |                    |                         |
| 4        | 33.3                |                             |                                  |                    |                         |
| 5        | 56.4                | 0.78, m                     | 6                                |                    |                         |
| 6        | 18.4                | 1.44, m; 1.25, m            | 5                                |                    |                         |
| 7        | 41.2                | 1.67, m; 1.02, m            |                                  |                    |                         |
| 8        | 36.8                |                             |                                  |                    |                         |
| 9        | 52.4                | 1.18, m                     |                                  | 12                 | 1 $\alpha$ , 14         |
| 10       | 37.8                |                             |                                  |                    |                         |
| 11       | 22.5                | 1.75, m; 1.62, m            | 12                               |                    | 11 $\beta$ (1.62)–21    |
| 12       | 76.9                | 4.80, dd (3.0, 2.4)         | 11                               | 9, 14, 1'          | 23                      |
| 13       | 41.9                |                             |                                  |                    |                         |
| 14       | 44.3                | 2.04, m                     | 15                               | 15                 | 9, 25                   |
| 15       | 24.7                | 2.42, m; 2.14, m            | 14, 16                           | 14, 16, 17         | 15 $\beta$ (2.14)–21    |
| 16       | 145.8               | 7.30, dd (4.3, 3.3)         | 15                               | 14, 18             |                         |
| 17       | 124.2               |                             |                                  |                    |                         |
| 18       | 58.7                | 3.07, dd (4.5, 1.1)         | 25                               | 14, 16, 17, 24, 25 | 23                      |
| 19       | 33.3                | 0.79, s                     |                                  | 4, 20              |                         |
| 20       | 21.4                | 0.73, s                     |                                  | 3, 4, 5            |                         |
| 21       | 16.4                | 0.85, s                     |                                  | 9, 14              | 11 $\beta$ , 15 $\beta$ |
| 22       | 16.3                | 0.74, s                     |                                  | 1, 9, 10           |                         |
| 23       | 21.8                | 0.86, s                     |                                  | 12, 13, 18         | 12, 18                  |
| 24       | 169.6               |                             |                                  |                    |                         |
| 25       | 196.4               | 9.41, d (4.5)               | 18                               | 18                 | 14                      |
| 1'       | 169.6               |                             |                                  |                    |                         |
| 2'       | 21.3                | 1.95, s                     |                                  | 1'                 |                         |

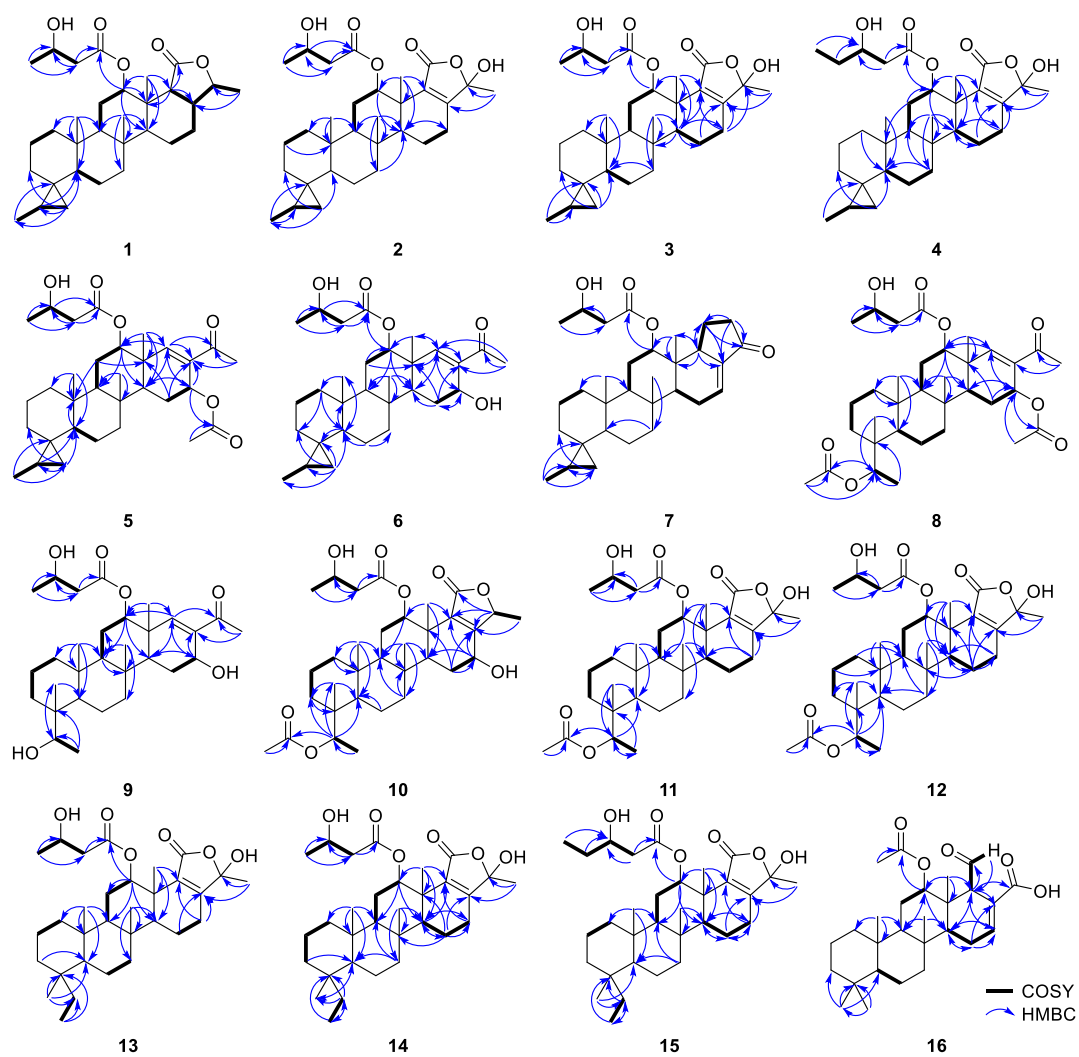

**Figure S2.** Key  $^1\text{H}$ - $^1\text{H}$  COSY and HMBC correlations of compounds **1-16**.

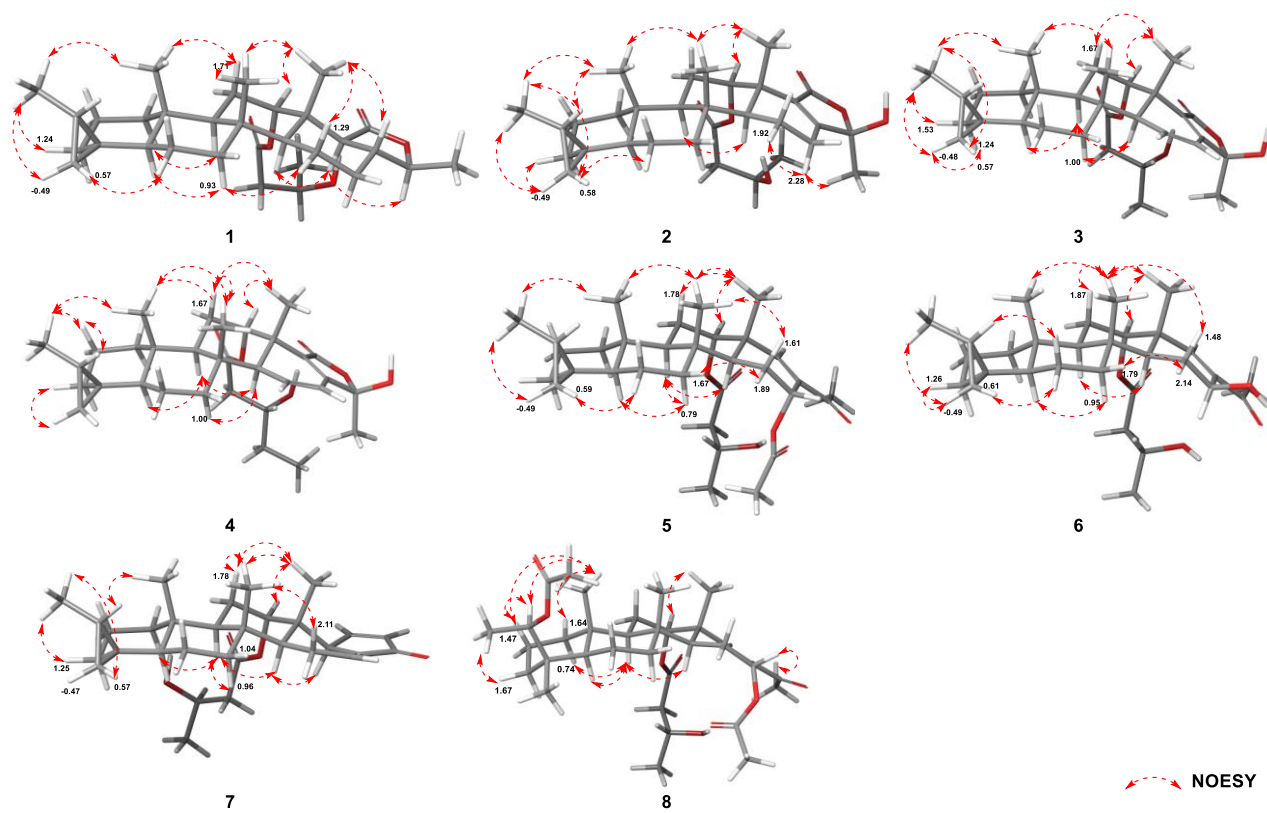

**Figure S3.** Key NOESY correlations of compounds **1-16** (continued).

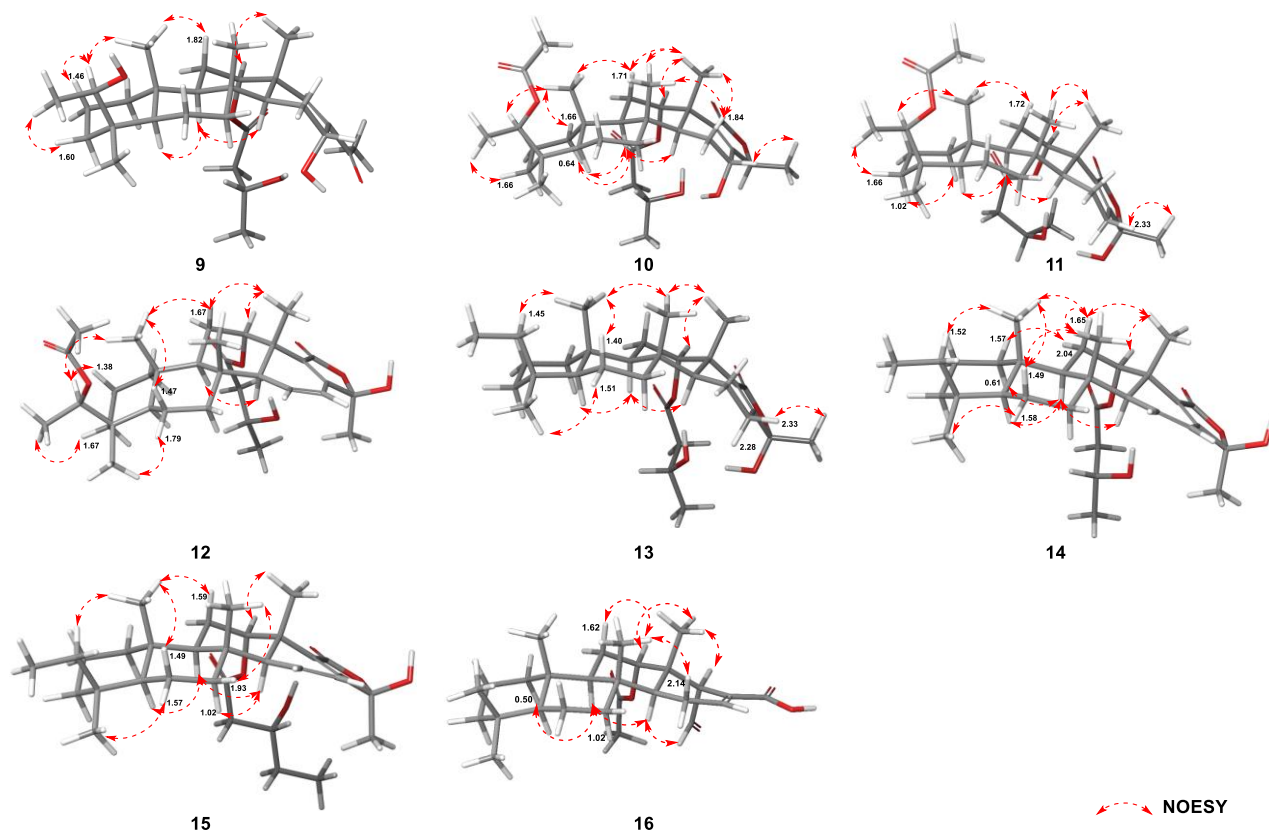

**Figure S3.** Key NOESY correlations of compounds **1-16**.

**Table S17.**  $^{13}\text{C}$  chemical shifts of phyllactone D/E (**17**, **18**), 12-*epi*-phyllactone D/E (**15**) analyzed by Li et al<sup>1</sup>, Andersen et al<sup>2</sup>, and our experimental data.

|          | 12 $\beta$ -epimer          |                             |                       | 12- <i>epi</i> -phyllactone D/E |                  |
|----------|-----------------------------|-----------------------------|-----------------------|---------------------------------|------------------|
| Position | Phyllactone D ( <b>17</b> ) | Phyllactone E ( <b>18</b> ) | Li et al <sup>1</sup> | Andersen et al <sup>2</sup>     | experimental     |
| #C       | $\delta\text{c}$            | $\delta\text{c}$            | $\delta\text{c}$      | $\delta\text{c}$                | $\delta\text{c}$ |
| 1        | 40.1                        | 40.5                        | 40.2                  | 40.0                            | 40.2/40.1        |
| 2        | 17.9                        | 17.9                        | 18.1                  | 18.2                            | 18.3             |
| 3        | 36.8                        | 36.8                        | 36.8                  | 36.6                            | 36.7             |
| 4        | 36.3                        | 36.3                        | 36.1                  | 36.1                            | 36.3             |
| 5        | 58.8                        | 58.8                        | 58.6                  | 58.6                            | 58.9             |
| 6        | 18.3                        | 18.3                        | 17.7                  | 17.8                            | 17.8             |
| 7        | 42.2                        | 41                          | 40                    | 41                              | 41.2/41.1        |
| 8        | 37                          | 37                          | 37.3                  | 37.2                            | 37.1/37.0        |
| 9        | <b>58.5</b>                 | <b>58.5</b>                 | <b>57</b>             | <b>52.5</b>                     | <b>52.7/52.6</b> |
| 10       | 37.6                        | 37.6                        | 36.6                  | 36.8                            | 37.3/37.2        |
| 11       | <b>24.3</b>                 | <b>24.4</b>                 | <b>24.1</b>           | <b>21.3</b>                     | <b>21.4</b>      |
| 12       | <b>75.1</b>                 | <b>75.8</b>                 | <b>75.3</b>           | <b>73.1</b>                     | <b>73.2/73.1</b> |
| 13       | 42.4                        | 41.1                        | 42.2                  | 40                              | 40.2/40.1        |
| 14       | <b>57.2</b>                 | <b>57</b>                   | <b>58.5</b>           | <b>53.9</b>                     | <b>54.0</b>      |
| 15       | 139.6                       | 139.3                       | 139.7                 | 138.8                           | 139.0            |
| 16       | 119.6                       | 119.3                       | 119.4                 | 118.1                           | 118.4/118.3      |
| 17       | 158.6                       | 158.2                       | 158.2                 | 156.4/157.2                     | 157.7/156.7      |
| 18       | 132.1                       | 132.1                       | 132.2                 | 131.1                           | 130.9/130.8      |
| 19       | 28.9                        | 28.7                        | 28.5                  | 28.5                            | 28.7/28.6        |
| 20       | 24.7                        | 24.7                        | 24.5                  | 24.5                            | 24.7             |
| 21       | 16.8                        | 16.8                        | 18.8                  | 16.7                            | 19.1/18.9        |
| 22       | 18.9                        | 18.9                        | 16.6                  | 18.9                            | 16.8/16.7        |
| 23       | <b>12.7</b>                 | <b>12.7</b>                 | <b>12.9</b>           | <b>17</b>                       | <b>17.3/17.0</b> |
| 24       | 103.1                       | 103.1                       | 102.7                 | 103.2                           | 103.5/103.4      |
| 25       | 168.6                       | 167.9                       | 168.2                 | unassigned                      | 168.9/168.3      |
| 26       | 24.1                        | 24.2                        | 24.5                  | 23.4/24.5                       | 24.8/23.5        |
| 27       | 8.8                         | 8.8                         | 8.6                   | 8.64                            | 8.8              |
| 1'       | 173.5                       | 172.9                       | 172.8                 | 171.1/171.3                     | 171.6/170.9      |
| 2'       | 42.5                        | 42.2                        | 42                    | 41.8                            | 41.9/41.8        |
| 3'       | 69.9                        | 69.7                        | 69.7                  | 69.7                            | 69.9/69.7        |
| 4'       | 29.6                        | 29.6                        | 29.6                  | 29.5                            | 29.5/29.5        |
| 5'       | 10                          | 10.1                        | 10                    | 9.9                             | 10.1             |

<sup>1</sup> Lan, W. J.; Li, H. J. *Helv. Chim. Acta* **2007**, *90*, 1218–1222.

<sup>2</sup> Williams, D. E.; Hollander, I.; Feldberg, L.; Frommer, E.; Mallon, R.; Tahir, A.; van Soest, R.; Andersen, R. J. *J. Nat. Prod.* **2009**, *72*, 1106–1109.

**Table S18.** <sup>1</sup>H chemical shifts of phyllactone D/E (**17**, **18**), 12-*epi*-phyllactone D/E (**15**) analyzed by Li et al<sup>1</sup>, Andersen et al<sup>2</sup>, and our experimental data.

|          | 12 $\beta$ -epimer          |                             |                                                     | 12- <i>epi</i> -phyllactone D/E |                          |
|----------|-----------------------------|-----------------------------|-----------------------------------------------------|---------------------------------|--------------------------|
| Position | Phyllactone D ( <b>17</b> ) | Phyllactone E ( <b>18</b> ) | Li et al <sup>1</sup>                               | Andersen et al <sup>2</sup>     | <b>experimental</b>      |
| #H       | $\delta_{\text{H}}$         | $\delta_{\text{H}}$         | $\delta_{\text{H}}$                                 | $\delta_{\text{H}}$             | $\delta_{\text{H}}$      |
| 9        |                             |                             | 1.05-1.08, m                                        | 1.22, nd                        | 1.23, m                  |
| 11       |                             |                             | ax: 1.65-1.71, m;<br>eq: 1.94, ddd (13.5, 3.0, 2.5) | 2.05, nd;<br>1.63, nd           | 2.05, m;<br>1.65, m      |
| 12       | 5.22, dd (11.0, 4.0)        | 4.99, dd (11.0, 4.0)        | 5.19, dd (3.0, 2.5)                                 | 5.56/5.51, bs                   | 5.58/5.51, dd (2.3, 1.8) |
| 14       |                             |                             | 2.19, d (3.5)                                       | 2.67/2.63, bs                   | 2.69/2.63, t (3.0)       |
| 23       | 1.08, s                     | 1.08, s                     | 1.12/1.11, s                                        | 1.08, s                         | 1.06/1.05, s             |

<sup>1</sup> Lan, W. J.; Li, H. J. *Helv. Chim. Acta* **2007**, *90*, 1218–1222.

<sup>2</sup> Williams, D. E.; Hollander, I.; Feldberg, L.; Frommer, E.; Mallon, R.; Tahir, A.; van Soest, R.; Andersen, R. J. *J. Nat. Prod.* **2009**, *72*, 1106–1109.



**Table S19.**  $^{13}\text{C}$  chemical shifts of representative examples of  $12\alpha$ -epimers (**3**, **4**, **12**, **14**, **15**) and  $12\beta$ -epimers (**17**, **18**, **20**<sup>1</sup>, **21**<sup>1</sup>).

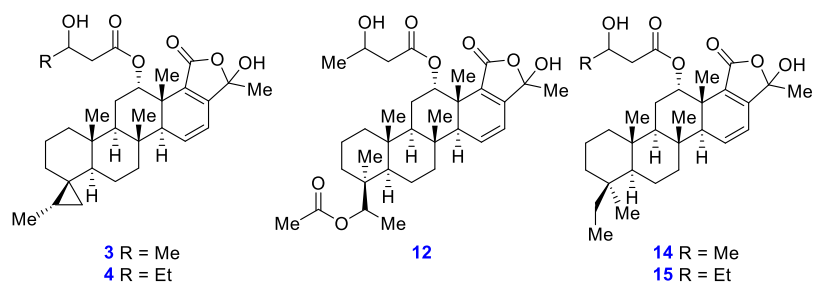

| Position | <b>3</b>  | <b>4</b>  | <b>12</b> | <b>14</b> | <b>15</b> |
|----------|-----------|-----------|-----------|-----------|-----------|
| 9        | 50.7/50.6 | 50.7/50.6 | 53.1/53.0 | 52.6/52.5 | 52.7/52.6 |
| 11       | 21.5      | 21.5      | 21.5/21.4 | 21.3/21.2 | 21.4      |
| 12       | 73.2/73.1 | 73.2/73.1 | 73.2/73.0 | 73.0      | 73.2/73.1 |
| 14       | 54.1/54.0 | 54.1/54.0 | 54.0/53.9 | 53.9      | 54.0      |
| 23       | 17.3/17.1 | 17.3/17.1 | 17.3/17.0 | 17.1/16.9 | 17.3/17.0 |

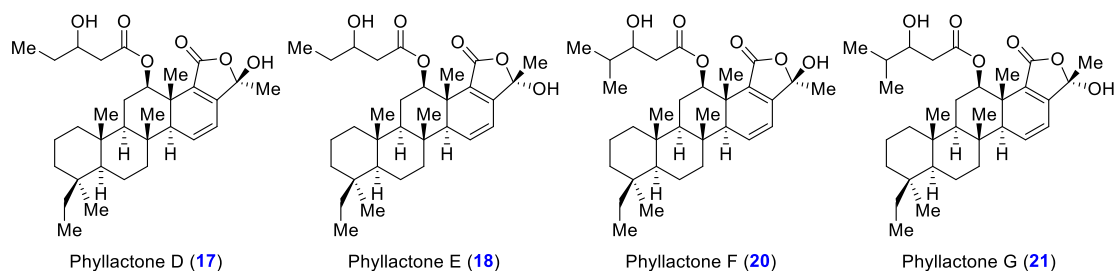

| Position | <b>17</b> | <b>18</b> | <b>20</b> | <b>21</b> |
|----------|-----------|-----------|-----------|-----------|
| 9        | 58.5      | 58.5      | 58.5      | 58.4      |
| 11       | 24.3      | 24.4      | 24.5      | 24.3      |
| 12       | 75.1      | 75.8      | 75.5      | 75.3      |
| 14       | 57.2      | 57.0      | 57.1      | 56.8      |
| 23       | 12.7      | 12.7      | 12.6      | 12.6      |

<sup>1</sup> Fu, X.; Zeng, L.; Su, J.; Pais, M.; Potier, P. *J. Nat. Prod.* **1993**, *56*, 1985–1988.

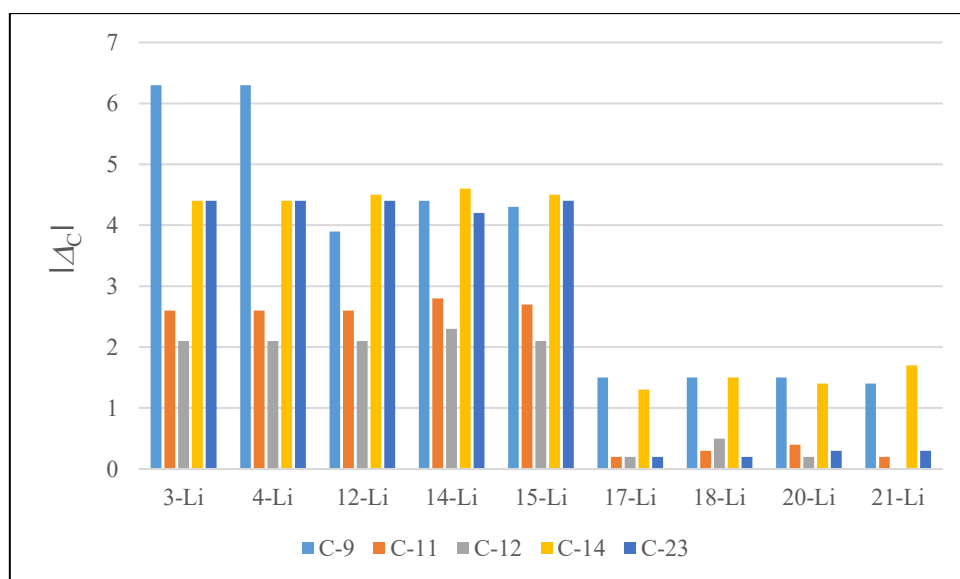

**Figure S4.** Comparison of  $|\Delta_C|$  values at C-9, 11, 12, 14, 23 for  $12\alpha$ -epimers (**3**, **4**, **12**, **14**, **15**) and  $12\beta$ -epimers (**17**, **18**, **20**, **21**) relative to those reported by Li et al.

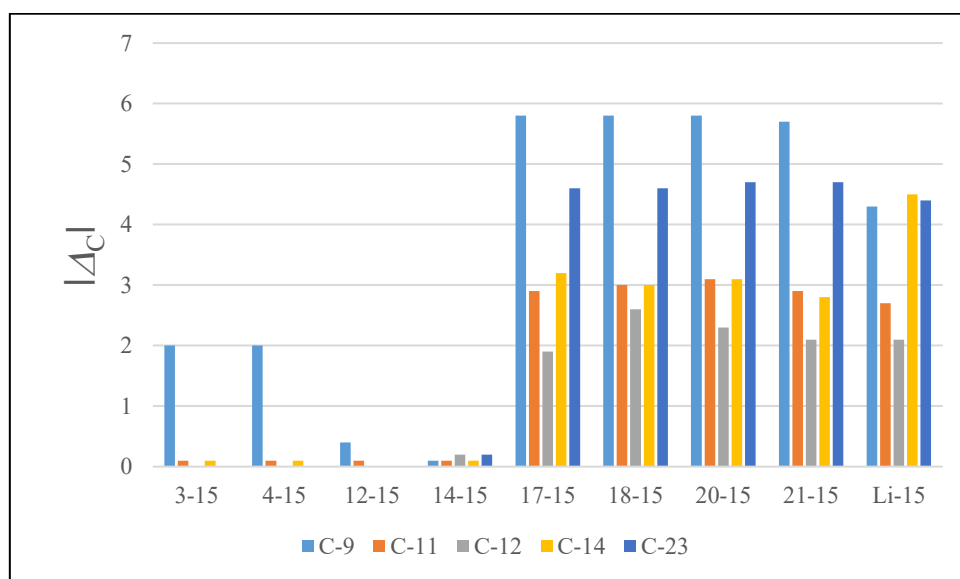

**Figure S5.** Comparison of  $|\Delta_C|$  values at C-9, 11, 12, 14, 23 for  $12\alpha$ -epimers (**3**, **4**, **12**, **14**) and  $12\beta$ -epimers (**17**, **18**, **20**, **21**, Li et al) relative to our experimental data for **15**.

## II. Computational methods

### 1. Geometry optimization

All of the molecular mechanics calculations were performed on Macromodel software (Maestro Materials Science 3.7.013 based on Maestro Core 12.3.013, MMshare Version 4.9.013, Release 2020-1, Platform Windows-x64). All conformational searches were conducted using the Polak-Ribier Conjugate Gradient (PRCG) method, the mixed torsional/low-mode sampling method, and the Optimized Potentials for Liquid Simulation (OPLS3e) force field. Additionally, the searches were carried out in the gas phase with a 21.0 kJ/mol upper energy limit. The maximum number of steps was set as 1000 to find all of the possible conformers.

Quantum mechanical calculations were performed using Jaguar (version 10.7). The conformers within an energy threshold of 5.0 kJ/mol were used as input structures for DFT calculations employing the hybrid-B3LYP and the 6-31G\*\* basis set to output optimized structures. All optimization was performed “fine” grid density and “ultrafine” accuracy level.
